# Supplementary material
Source: publisher site journal article supplement (https://www.dovepress.com/article/577486)

## Summary of Supplementary Data

Supplementary Table S1. Details of the data sources used in this study.

Supplementary Table S2. MAGMA analysis results-Gene list.

Supplementary Table S3. The SMR analysis was employed to analyze the association between eQTLGen's eQTL and vitiligo.

Supplementary Table S4. Primer sequences used for quantitative real-time PCR (qPCR)

Supplementary Figure S1. Sub-clustering and compositional analysis of epidermal antigen-presenting cells (APCs).

**Supplementary Table S1** Details of the data sources used in this study.

| <b>Traits</b> | <b>Data source</b> | <b>Data type</b> | <b>Source</b>                                                                                                                                                                                                         |
|---------------|--------------------|------------------|-----------------------------------------------------------------------------------------------------------------------------------------------------------------------------------------------------------------------|
| Vitiligo      | FinnGen R12        | GWAS             | <a href="https://r12.finngen.fi/">https://r12.finngen.fi/</a>                                                                                                                                                         |
| eqtl          | eQTLGen            | GWAS             | <a href="https://molgenis26.gcc.rug.nl/downloads/eqtngen/cis-eqtl/SMR_formatted/cis-eQTL-SMR_20191212.tar.gz">https://molgenis26.gcc.rug.nl/downloads/eqtngen/cis-eqtl/SMR_formatted/cis-eQTL-SMR_20191212.tar.gz</a> |
| Vitiligo      | GEO-GSE203262      | scRNA-seq        | <a href="https://www.ncbi.nlm.nih.gov/geo/query/acc.cgi?acc=GSE203262">https://www.ncbi.nlm.nih.gov/geo/query/acc.cgi?acc=GSE203262</a>                                                                               |

Supplementary Table S2 MAGMA analysis results-Gene list.

| GENE            | Ensembl ID | GENE     | CHR | START    | STOP     | NSNPS | NPARAM | N      | ZSTAT  | P       |
|-----------------|------------|----------|-----|----------|----------|-------|--------|--------|--------|---------|
| ENSG00000002919 |            | SNX11    | 17  | 46180719 | 46200436 | 23    | 5      | 466064 | 1.6971 | 0.04484 |
| ENSG00000005001 |            | PRSS22   | 16  | 2902728  | 2908171  | 37    | 6      | 466064 | 1.8876 | 0.02954 |
| ENSG00000005448 |            | WDR54    | 2   | 74648805 | 74652882 | 2     | 1      | 466064 | 1.865  | 0.03109 |
| ENSG00000005812 |            | FBXL3    | 13  | 77566740 | 77601330 | 98    | 14     | 466064 | 1.6707 | 0.04739 |
| ENSG00000006047 |            | YBX2     | 17  | 7191571  | 7197934  | 8     | 4      | 466064 | 1.8274 | 0.03382 |
| ENSG00000007038 |            | PRSS21   | 16  | 2867164  | 2876305  | 27    | 7      | 466064 | 1.8252 | 0.03398 |
| ENSG00000007933 |            | FMO3     | 1   | 1.71E+08 | 1.71E+08 | 87    | 12     | 466064 | 1.652  | 0.04927 |
| ENSG00000008226 |            | DLEC1    | 3   | 38080696 | 38165516 | 138   | 22     | 466064 | 2.6736 | 0.00375 |
| ENSG00000008282 |            | SYPL1    | 7   | 1.06E+08 | 1.06E+08 | 70    | 12     | 466064 | 2.9667 | 0.00151 |
| ENSG00000009307 |            | CSDE1    | 1   | 1.15E+08 | 1.15E+08 | 145   | 27     | 466064 | 1.8429 | 0.03267 |
| ENSG00000009413 |            | REV3L    | 6   | 1.12E+08 | 1.12E+08 | 559   | 36     | 466064 | 1.8715 | 0.03064 |
| ENSG00000010292 |            | NCAPD2   | 12  | 6602522  | 6641121  | 60    | 11     | 466064 | 1.7299 | 0.04183 |
| ENSG00000011523 |            | CEP68    | 2   | 65283500 | 65314138 | 73    | 16     | 466064 | 2.1516 | 0.01572 |
| ENSG00000012223 |            | LTF      | 3   | 46477136 | 46526724 | 113   | 13     | 466064 | 2.5241 | 0.0058  |
| ENSG00000013288 |            | MAN2B2   | 4   | 6576902  | 6625089  | 149   | 24     | 466064 | 2.1791 | 0.01466 |
| ENSG00000013364 |            | MVP      | 16  | 29831715 | 29859355 | 25    | 3      | 466064 | 2.0594 | 0.01973 |
| ENSG00000013561 |            | RNF14    | 5   | 1.41E+08 | 1.41E+08 | 68    | 13     | 466064 | 2.3495 | 0.0094  |
| ENSG00000019169 |            | MARCO    | 2   | 1.2E+08  | 1.2E+08  | 114   | 16     | 466064 | 1.8381 | 0.03302 |
| ENSG00000020129 |            | NCDN     | 1   | 36023074 | 36032875 | 18    | 6      | 466064 | 1.7437 | 0.04061 |
| ENSG00000023330 |            | ALAS1    | 3   | 52232102 | 52248343 | 32    | 8      | 466064 | 1.8156 | 0.03472 |
| ENSG00000028277 |            | POU2F2   | 19  | 42590263 | 42700737 | 169   | 9      | 466064 | 1.6472 | 0.04976 |
| ENSG00000029534 |            | ANK1     | 8   | 41510739 | 41754280 | 816   | 50     | 466064 | 1.8896 | 0.0294  |
| ENSG00000031003 |            | FAM13B   | 5   | 1.37E+08 | 1.37E+08 | 313   | 27     | 466064 | 2.8146 | 0.00244 |
| ENSG00000033327 |            | GAB2     | 11  | 77926343 | 78129394 | 724   | 32     | 466064 | 1.9856 | 0.02354 |
| ENSG00000034053 |            | APBA2    | 15  | 29129629 | 29410518 | 912   | 75     | 466064 | 1.8051 | 0.03553 |
| ENSG00000037757 |            | MRI1     | 19  | 13875346 | 13885096 | 16    | 2      | 466064 | 1.801  | 0.03585 |
| ENSG00000044574 |            | HSPA5    | 9   | 1.28E+08 | 1.28E+08 | 14    | 5      | 466064 | 2.2717 | 0.01155 |
| ENSG00000047457 |            | CP       | 3   | 1.49E+08 | 1.49E+08 | 250   | 21     | 466064 | 2.3075 | 0.01051 |
| ENSG00000048405 |            | ZNF800   | 7   | 1.27E+08 | 1.27E+08 | 249   | 25     | 466064 | 1.8178 | 0.03455 |
| ENSG00000049089 |            | COL9A2   | 1   | 40766159 | 40783488 | 49    | 10     | 466064 | 2.4159 | 0.00785 |
| ENSG00000049618 |            | ARID1B   | 6   | 1.57E+08 | 1.58E+08 | 1124  | 82     | 466064 | 1.8423 | 0.03272 |
| ENSG00000052723 |            | SIKE1    | 1   | 1.15E+08 | 1.15E+08 | 35    | 8      | 466064 | 2.1933 | 0.01414 |
| ENSG00000053918 |            | KCNQ1    | 11  | 2465914  | 2870339  | 1180  | 158    | 466064 | 2.6021 | 0.00463 |
| ENSG00000056972 |            | TRAF3IP2 | 6   | 1.12E+08 | 1.12E+08 | 141   | 19     | 466064 | 1.7611 | 0.03911 |
| ENSG00000060642 |            | PIGV     | 1   | 27113963 | 27124889 | 11    | 5      | 466064 | 1.7384 | 0.04108 |
| ENSG00000060709 |            | RIMBP2   | 12  | 1.31E+08 | 1.31E+08 | 1234  | 99     | 466064 | 2.5405 | 0.00554 |
| ENSG00000060971 |            | ACAA1    | 3   | 38144620 | 38178733 | 40    | 11     | 466064 | 2.4493 | 0.00716 |
| ENSG00000061455 |            | PRDM6    | 5   | 1.22E+08 | 1.23E+08 | 239   | 26     | 466064 | 2.4947 | 0.0063  |
| ENSG00000062282 |            | DGAT2    | 11  | 75470557 | 75512579 | 108   | 14     | 466064 | 2.0035 | 0.02256 |
| ENSG00000064225 |            | ST3GAL6  | 3   | 98451080 | 98540045 | 205   | 30     | 466064 | 2.4011 | 0.00817 |
| ENSG00000064300 |            | NGFR     | 17  | 47572655 | 47592379 | 31    | 6      | 466064 | 2.6302 | 0.00427 |
| ENSG00000064787 |            | BCAS1    | 20  | 52553316 | 52687304 | 447   | 22     | 466064 | 2.2367 | 0.01265 |
| ENSG00000065268 |            | WDR18    | 19  | 983174   | 994569   | 68    | 8      | 466064 | 1.8222 | 0.03421 |
| ENSG00000065534 |            | MYLK     | 3   | 1.23E+08 | 1.24E+08 | 672   | 47     | 466064 | 2.4787 | 0.00659 |
| ENSG00000065621 |            | GSTO2    | 10  | 1.06E+08 | 1.06E+08 | 90    | 9      | 466064 | 2.8029 | 0.00253 |
| ENSG00000065911 |            | MTHFD2   | 2   | 74425689 | 74444692 | 18    | 5      | 466064 | 1.8928 | 0.02919 |
| ENSG00000066044 |            | ELAVL1   | 19  | 8023463  | 8070543  | 199   | 32     | 466064 | 2.6638 | 0.00386 |
| ENSG00000067113 |            | PPAP2A   | 5   | 54720682 | 54830878 | 389   | 30     | 466064 | 2.3985 | 0.00823 |
| ENSG00000067798 |            | NAV3     | 12  | 78224685 | 78606790 | 999   | 83     | 466064 | 1.8471 | 0.03237 |
| ENSG00000067955 |            | CBFB     | 16  | 67063019 | 67134961 | 72    | 9      | 466064 | 1.9178 | 0.02757 |
| ENSG00000068001 |            | HYAL2    | 3   | 50355221 | 50360337 | 5     | 3      | 466064 | 1.8765 | 0.03029 |
| ENSG00000068912 |            | ERLEC1   | 2   | 54014181 | 54045956 | 81    | 12     | 466064 | 1.9639 | 0.02477 |
| ENSG00000069424 |            | KCNAB2   | 1   | 6051526  | 6161253  | 349   | 41     | 466064 | 2.1743 | 0.01484 |
| ENSG00000069696 |            | DRD4     | 11  | 637293   | 640706   | 7     | 3      | 466064 | 2.3066 | 0.01054 |
| ENSG00000069812 |            | HES2     | 1   | 6472478  | 6484730  | 19    | 5      | 466064 | 2.1799 | 0.01463 |
| ENSG00000070729 |            | CNGB1    | 16  | 57917503 | 58005020 | 245   | 42     | 466064 | 1.9602 | 0.02499 |
| ENSG00000070770 |            | CSNK2A2  | 16  | 58191811 | 58231824 | 162   | 15     | 466064 | 2.8492 | 0.00219 |
| ENSG00000071242 |            | RPS6KA2  | 6   | 1.67E+08 | 1.67E+08 | 2101  | 85     | 466064 | 1.8813 | 0.02997 |
| ENSG00000071243 |            | ING3     | 7   | 1.21E+08 | 1.21E+08 | 64    | 8      | 466064 | 1.8816 | 0.02994 |
| ENSG00000071539 |            | TRIP13   | 5   | 892758   | 919472   | 63    | 5      | 466064 | 1.6517 | 0.04929 |
| ENSG00000071564 |            | TCF3     | 19  | 1609291  | 1652604  | 95    | 22     | 466064 | 2.197  | 0.01401 |
| ENSG00000072121 |            | ZFYVE26  | 14  | 68194091 | 68283307 | 141   | 13     | 466064 | 1.825  | 0.034   |
| ENSG00000072657 |            | TRHDE    | 12  | 72481046 | 73059422 | 1826  | 58     | 466064 | 1.8993 | 0.02877 |
| ENSG00000072736 |            | NFATC3   | 16  | 68118654 | 68263162 | 222   | 13     | 466064 | 1.9033 | 0.0285  |
| ENSG00000072786 |            | STK10    | 5   | 1.71E+08 | 1.72E+08 | 473   | 65     | 466064 | 2.3037 | 0.01062 |
| ENSG00000073067 |            | CYP2W1   | 7   | 1022835  | 1029276  | 41    | 12     | 466064 | 1.6589 | 0.04857 |
| ENSG00000073578 |            | SDHA     | 5   | 218356   | 256815   | 275   | 5      | 466064 | 2.3399 | 0.00964 |
| ENSG00000075043 |            | KCNQ2    | 20  | 62037542 | 62103993 | 189   | 26     | 466064 | 1.8289 | 0.0337  |
| ENSG00000075303 |            | SLC25A40 | 7   | 87462883 | 87505672 | 124   | 11     | 466064 | 1.856  | 0.03173 |
| ENSG00000076928 |            | ARHGEF1  | 19  | 42387228 | 42434302 | 32    | 8      | 466064 | 2.6224 | 0.00437 |
| ENSG00000076984 |            | MAP2K7   | 19  | 7968728  | 7979363  | 26    | 7      | 466064 | 2.9427 | 0.00163 |

|                 |             |    |          |          |       |     |        |        |          |
|-----------------|-------------|----|----------|----------|-------|-----|--------|--------|----------|
| ENSG00000077157 | PPP1R12B    | 1  | 2.02E+08 | 2.03E+08 | 347   | 19  | 466064 | 1.8348 | 0.03327  |
| ENSG00000077380 | DYNC112     | 2  | 1.73E+08 | 1.73E+08 | 190   | 17  | 466064 | 1.6556 | 0.0489   |
| ENSG00000078328 | RBFOX1      | 16 | 6069095  | 7763340  | 10284 | 455 | 466064 | 2.1759 | 0.01478  |
| ENSG00000078369 | GNB1        | 1  | 1716729  | 1822495  | 229   | 23  | 466064 | 2.2557 | 0.01204  |
| ENSG00000078401 | EDN1        | 6  | 12290596 | 12297427 | 25    | 8   | 466064 | 1.8861 | 0.02964  |
| ENSG00000078795 | PKD2L2      | 5  | 1.37E+08 | 1.37E+08 | 152   | 18  | 466064 | 1.9352 | 0.02648  |
| ENSG00000078967 | UBE2D4      | 7  | 43966037 | 43995735 | 70    | 13  | 466064 | 2.3082 | 0.01049  |
| ENSG00000079101 | CLUL1       | 18 | 596988   | 650334   | 185   | 37  | 466064 | 2.1897 | 0.01427  |
| ENSG00000079689 | SCGN        | 6  | 25652464 | 25702011 | 155   | 24  | 466064 | 2.425  | 0.00765  |
| ENSG00000080200 | CRYBG3      | 3  | 97595819 | 97663810 | 108   | 20  | 466064 | 1.7927 | 0.03651  |
| ENSG00000080293 | SCTR        | 2  | 1.2E+08  | 1.2E+08  | 225   | 16  | 466064 | 2.1526 | 0.01567  |
| ENSG00000080644 | CHRNA3      | 15 | 78885394 | 78913637 | 75    | 5   | 466064 | 1.6979 | 0.04476  |
| ENSG00000081026 | MAGI3       | 1  | 1.14E+08 | 1.14E+08 | 918   | 100 | 466064 | 2.0496 | 0.0202   |
| ENSG00000081853 | PCDHGA2     | 5  | 1.41E+08 | 1.41E+08 | 340   | 15  | 466064 | 1.7946 | 0.03636  |
| ENSG00000082212 | ME2         | 18 | 48405419 | 48474691 | 160   | 21  | 466064 | 1.9844 | 0.0236   |
| ENSG00000082213 | C5orf22     | 5  | 31532373 | 31555165 | 71    | 15  | 466064 | 1.7146 | 0.04321  |
| ENSG00000083168 | KAT6A       | 8  | 41786997 | 41909508 | 264   | 40  | 466064 | 1.8231 | 0.03414  |
| ENSG00000084073 | ZMPSTE24    | 1  | 40723779 | 40759856 | 88    | 11  | 466064 | 2.2361 | 0.01267  |
| ENSG00000085365 | SCAMP1      | 5  | 77656339 | 77776562 | 418   | 22  | 466064 | 2.0504 | 0.02016  |
| ENSG00000086504 | MRPL28      | 16 | 417384   | 420527   | 10    | 3   | 466064 | 2.0985 | 0.01793  |
| ENSG00000086666 | ZFAND6      | 15 | 80351910 | 80430735 | 360   | 30  | 466064 | 2.076  | 0.01895  |
| ENSG00000087116 | ADAMTS2     | 5  | 1.79E+08 | 1.79E+08 | 841   | 60  | 466064 | 2.0306 | 0.02115  |
| ENSG00000087237 | CETP        | 16 | 56995762 | 57017757 | 76    | 20  | 466064 | 1.6913 | 0.04539  |
| ENSG00000088812 | ATRN        | 20 | 3451687  | 3631769  | 458   | 19  | 466064 | 1.9998 | 0.02276  |
| ENSG00000089101 | C20orf26    | 20 | 20033158 | 20341346 | 979   | 59  | 466064 | 2.1739 | 0.01486  |
| ENSG00000089169 | RPH3A       | 12 | 1.13E+08 | 1.13E+08 | 919   | 46  | 466064 | 1.7353 | 0.04135  |
| ENSG00000089486 | CDIP1       | 16 | 4560676  | 4588829  | 53    | 10  | 466064 | 3.2521 | 0.00057  |
| ENSG00000089847 | ANKRD24     | 19 | 4183351  | 4224811  | 185   | 28  | 466064 | 1.7404 | 0.0409   |
| ENSG00000090273 | NUDC        | 1  | 27226729 | 27273353 | 68    | 11  | 466064 | 1.9194 | 0.02747  |
| ENSG00000091164 | TXNL1       | 18 | 54264439 | 54318831 | 175   | 12  | 466064 | 2.5831 | 0.0049   |
| ENSG00000091317 | CMTM6       | 3  | 32522804 | 32544900 | 39    | 10  | 466064 | 1.8442 | 0.03258  |
| ENSG00000091704 | CPA1        | 7  | 1.3E+08  | 1.3E+08  | 24    | 3   | 466064 | 2.6767 | 0.00372  |
| ENSG00000092208 | GEMIN2      | 14 | 39583427 | 39606177 | 60    | 10  | 466064 | 1.7657 | 0.03872  |
| ENSG00000092531 | SNAP23      | 15 | 42783431 | 42837547 | 57    | 14  | 466064 | 1.9566 | 0.0252   |
| ENSG00000095713 | CRTAC1      | 10 | 99624757 | 99790585 | 328   | 18  | 466064 | 1.733  | 0.04155  |
| ENSG00000095794 | CREM        | 10 | 35415719 | 35501886 | 111   | 15  | 466064 | 1.9862 | 0.02351  |
| ENSG00000096384 | HSP90AB1    | 6  | 44214824 | 44221620 | 18    | 5   | 466064 | 2.9422 | 0.00163  |
| ENSG00000097021 | ACOT7       | 1  | 6324329  | 6454451  | 430   | 23  | 466064 | 1.7144 | 0.04323  |
| ENSG00000100129 | EIF3L       | 22 | 38244875 | 38285414 | 122   | 19  | 466064 | 1.7667 | 0.03864  |
| ENSG00000100284 | TOM1        | 22 | 35695268 | 35743985 | 221   | 18  | 466064 | 1.8397 | 0.03291  |
| ENSG00000100320 | RBFOX2      | 22 | 36134783 | 36424473 | 1268  | 89  | 466064 | 2.3397 | 0.00965  |
| ENSG00000100359 | SGSM3       | 22 | 40766595 | 40806293 | 46    | 5   | 466064 | 1.7449 | 0.0405   |
| ENSG00000100362 | PVALB       | 22 | 37196728 | 37215523 | 60    | 11  | 466064 | 1.6942 | 0.04512  |
| ENSG00000100372 | SLC25A17    | 22 | 41165634 | 41215403 | 110   | 9   | 466064 | 1.7034 | 0.04425  |
| ENSG00000100380 | ST13        | 22 | 41220539 | 41253026 | 57    | 9   | 466064 | 2.1262 | 0.01674  |
| ENSG00000100412 | ACO2        | 22 | 41865129 | 41924993 | 120   | 12  | 466064 | 1.822  | 0.03423  |
| ENSG00000100554 | ATP6V1D     | 14 | 67761088 | 67826982 | 167   | 12  | 466064 | 1.7588 | 0.0393   |
| ENSG00000100596 | SPTLC2      | 14 | 77972340 | 78083116 | 355   | 28  | 466064 | 1.8303 | 0.0336   |
| ENSG00000100813 | ACIN1       | 14 | 23527773 | 23564823 | 54    | 16  | 466064 | 1.6828 | 0.04621  |
| ENSG00000101004 | NINL        | 20 | 25433341 | 25566153 | 302   | 18  | 466064 | 1.6745 | 0.04702  |
| ENSG00000101084 | C20orf24    | 20 | 35234137 | 35240960 | 4     | 2   | 466064 | 1.6875 | 0.04576  |
| ENSG00000101132 | PFDN4       | 20 | 52824386 | 52844591 | 38    | 9   | 466064 | 2.3912 | 0.0084   |
| ENSG00000101150 | TPD5L2      | 20 | 62496596 | 62522898 | 52    | 9   | 466064 | 1.8876 | 0.02954  |
| ENSG00000101152 | DNAJC5      | 20 | 62526518 | 62567384 | 123   | 16  | 466064 | 2.2339 | 0.01274  |
| ENSG00000101162 | TUBB1       | 20 | 57594309 | 57601709 | 26    | 6   | 466064 | 2.1133 | 0.01729  |
| ENSG00000102452 | NALCN       | 13 | 1.02E+08 | 1.02E+08 | 979   | 69  | 466064 | 2.1782 | 0.01469  |
| ENSG00000102755 | FLT1        | 13 | 28874489 | 29069265 | 587   | 45  | 466064 | 1.8688 | 0.03083  |
| ENSG00000102871 | TRADD       | 16 | 67188083 | 67194201 | 6     | 2   | 466064 | 1.8552 | 0.03178  |
| ENSG00000102878 | HSF4        | 16 | 67197288 | 67203848 | 12    | 3   | 466064 | 2.1166 | 0.01715  |
| ENSG00000102981 | PAR6A       | 16 | 67694849 | 67696681 | 2     | 1   | 466064 | 2.3032 | 0.01063  |
| ENSG00000102996 | MMP15       | 16 | 58059470 | 58080805 | 74    | 6   | 466064 | 1.957  | 0.02517  |
| ENSG00000103089 | FA2H        | 16 | 74746853 | 74808729 | 218   | 27  | 466064 | 1.6901 | 0.04551  |
| ENSG00000103248 | MTHFSD      | 16 | 86563782 | 86588841 | 95    | 15  | 466064 | 1.6904 | 0.04548  |
| ENSG00000103260 | METRNL      | 16 | 765115   | 769655   | 21    | 5   | 466064 | 1.8618 | 0.03132  |
| ENSG00000103335 | PIEZO1      | 16 | 88781751 | 88851619 | 372   | 28  | 466064 | 1.6499 | 0.04948  |
| ENSG00000103381 | CPPED1      | 16 | 12756919 | 12897874 | 615   | 42  | 466064 | 1.7629 | 0.03896  |
| ENSG00000103415 | HMOX2       | 16 | 4524691  | 4560348  | 92    | 11  | 466064 | 3.7782 | 7.90E-05 |
| ENSG00000103423 | DNAJA3      | 16 | 4475806  | 4506776  | 93    | 8   | 466064 | 3.9444 | 4.00E-05 |
| ENSG00000103426 | CORO7-PAM16 | 16 | 4390252  | 4470495  | 195   | 18  | 466064 | 2.5484 | 0.00541  |
| ENSG00000103449 | SALL1       | 16 | 51169886 | 51185278 | 22    | 7   | 466064 | 2.9896 | 0.0014   |
| ENSG00000103495 | MAZ         | 16 | 29817427 | 29823649 | 10    | 2   | 466064 | 1.9404 | 0.02617  |
| ENSG00000104064 | GABPB1      | 15 | 50569389 | 50647605 | 207   | 17  | 466064 | 1.6553 | 0.04893  |
| ENSG00000104140 | RHOV        | 15 | 41164412 | 41166487 | 8     | 2   | 466064 | 1.689  | 0.04561  |

|                 |          |    |          |          |      |     |        |        |         |
|-----------------|----------|----|----------|----------|------|-----|--------|--------|---------|
| ENSG00000104313 | EYA1     | 8  | 72109668 | 72274467 | 601  | 34  | 466064 | 2.0744 | 0.01902 |
| ENSG00000104450 | SPAG1    | 8  | 1.01E+08 | 1.01E+08 | 240  | 28  | 466064 | 2.038  | 0.02078 |
| ENSG00000104613 | INTS10   | 8  | 19674651 | 19709594 | 182  | 26  | 466064 | 1.9361 | 0.02643 |
| ENSG00000104626 | ERI1     | 8  | 8859657  | 8974256  | 555  | 43  | 466064 | 2.5779 | 0.00497 |
| ENSG00000104731 | KLHDC4   | 16 | 87730091 | 87799598 | 260  | 24  | 466064 | 1.773  | 0.03811 |
| ENSG00000104755 | ADAM2    | 8  | 39601254 | 39695808 | 161  | 20  | 466064 | 2.3887 | 0.00845 |
| ENSG00000104921 | FCER2    | 19 | 7753644  | 7767032  | 48   | 9   | 466064 | 2.0119 | 0.02211 |
| ENSG00000104938 | CLEC4M   | 19 | 7828035  | 7834491  | 16   | 6   | 466064 | 2.5734 | 0.00504 |
| ENSG00000104976 | SNAPC2   | 19 | 7985201  | 7988135  | 4    | 2   | 466064 | 1.7353 | 0.04134 |
| ENSG00000104979 | C19orf53 | 19 | 13884982 | 13889276 | 22   | 3   | 466064 | 1.7129 | 0.04336 |
| ENSG00000105131 | EPHX3    | 19 | 15337730 | 15344246 | 8    | 4   | 466064 | 1.7161 | 0.04307 |
| ENSG00000105278 | ZFR2     | 19 | 3804022  | 3869030  | 221  | 28  | 466064 | 1.7169 | 0.043   |
| ENSG00000105369 | CD79A    | 19 | 42381190 | 42385439 | 11   | 1   | 466064 | 2.7413 | 0.00306 |
| ENSG00000105372 | RPS19    | 19 | 42363988 | 42376994 | 12   | 3   | 466064 | 2.7402 | 0.00307 |
| ENSG00000105404 | RABAC1   | 19 | 42460833 | 42463542 | 1    | 1   | 466064 | 1.8453 | 0.0325  |
| ENSG00000105409 | ATP1A3   | 19 | 42470734 | 42501649 | 23   | 6   | 466064 | 1.9809 | 0.0238  |
| ENSG00000105426 | PTPRS    | 19 | 5158506  | 5340814  | 638  | 82  | 466064 | 1.9969 | 0.02292 |
| ENSG00000105507 | CABP5    | 19 | 48533210 | 48547310 | 50   | 9   | 466064 | 1.7639 | 0.03887 |
| ENSG00000105609 | LILRB5   | 19 | 54754263 | 54761164 | 15   | 6   | 466064 | 3.0513 | 0.00114 |
| ENSG00000105737 | GRIK5    | 19 | 42502473 | 42573650 | 60   | 8   | 466064 | 1.7112 | 0.04353 |
| ENSG00000105784 | RUNDC3B  | 7  | 87256864 | 87461611 | 484  | 36  | 466064 | 1.919  | 0.0275  |
| ENSG00000105793 | GTPBP10  | 7  | 89964537 | 90020769 | 314  | 20  | 466064 | 1.8378 | 0.03305 |
| ENSG00000106066 | CPVL     | 7  | 29034847 | 29235067 | 673  | 78  | 466064 | 2.8523 | 0.00217 |
| ENSG00000106069 | CHN2     | 7  | 29161890 | 29553944 | 1353 | 106 | 466064 | 1.9679 | 0.02454 |
| ENSG00000106100 | NOD1     | 7  | 30464143 | 30518400 | 164  | 24  | 466064 | 1.914  | 0.02781 |
| ENSG00000106436 | MYL10    | 7  | 1.01E+08 | 1.01E+08 | 96   | 3   | 466064 | 2.3042 | 0.01061 |
| ENSG00000106477 | CEP41    | 7  | 1.3E+08  | 1.3E+08  | 92   | 19  | 466064 | 2.2814 | 0.01126 |
| ENSG00000106538 | RARRS2   | 7  | 1.5E+08  | 1.5E+08  | 2    | 1   | 466064 | 1.6911 | 0.04541 |
| ENSG00000106608 | URGCP    | 7  | 43915493 | 43966010 | 143  | 18  | 466064 | 2.3472 | 0.00946 |
| ENSG00000106633 | GCK      | 7  | 44183872 | 44237769 | 153  | 20  | 466064 | 2.0873 | 0.01843 |
| ENSG00000106948 | AKNA     | 9  | 1.17E+08 | 1.17E+08 | 201  | 33  | 466064 | 1.9553 | 0.02527 |
| ENSG00000107185 | RGP1     | 9  | 35749203 | 35758572 | 15   | 5   | 466064 | 1.7474 | 0.04029 |
| ENSG00000107521 | HPS1     | 10 | 1E+08    | 1E+08    | 65   | 10  | 466064 | 1.8056 | 0.03549 |
| ENSG00000107731 | UNC5B    | 10 | 72972327 | 73062621 | 143  | 10  | 466064 | 1.677  | 0.04677 |
| ENSG00000107779 | BMPR1A   | 10 | 88516407 | 88692595 | 305  | 31  | 466064 | 2.4819 | 0.00653 |
| ENSG00000107890 | ANKRD26  | 10 | 27280843 | 27389421 | 455  | 37  | 466064 | 2.2696 | 0.01162 |
| ENSG00000107984 | DKK1     | 10 | 54074056 | 54077802 | 13   | 4   | 466064 | 2.1874 | 0.01436 |
| ENSG00000108094 | CUL2     | 10 | 35297479 | 35379570 | 86   | 12  | 466064 | 1.9129 | 0.02788 |
| ENSG00000108306 | FBXL20   | 17 | 37415384 | 37558776 | 318  | 22  | 466064 | 2.1929 | 0.01416 |
| ENSG00000108352 | RAPGEFL1 | 17 | 38333263 | 38351908 | 38   | 9   | 466064 | 1.658  | 0.04866 |
| ENSG00000108379 | WNT3     | 17 | 44839872 | 44910520 | 200  | 20  | 466064 | 1.8551 | 0.03179 |
| ENSG00000108384 | RAD51C   | 17 | 56769934 | 56811703 | 122  | 12  | 466064 | 2.953  | 0.00157 |
| ENSG00000108511 | HOXB6    | 17 | 46671639 | 46682354 | 2    | 1   | 466064 | 1.875  | 0.0304  |
| ENSG00000108798 | ABI3     | 17 | 47287589 | 47300587 | 42   | 10  | 466064 | 2.2082 | 0.01361 |
| ENSG00000109132 | PHOX2B   | 4  | 41746099 | 41750987 | 7    | 2   | 466064 | 1.7208 | 0.04264 |
| ENSG00000109184 | DCUN1D4  | 4  | 52709166 | 52783003 | 155  | 15  | 466064 | 2.3481 | 0.00944 |
| ENSG00000109189 | USP46    | 4  | 53457138 | 53525502 | 198  | 20  | 466064 | 2.3663 | 0.00898 |
| ENSG00000109220 | CHIC2    | 4  | 54875956 | 54930857 | 119  | 16  | 466064 | 1.6832 | 0.04617 |
| ENSG00000109445 | ZNF330   | 4  | 1.42E+08 | 1.42E+08 | 33   | 6   | 466064 | 1.6478 | 0.04969 |
| ENSG00000109586 | GALNT7   | 4  | 1.74E+08 | 1.74E+08 | 482  | 69  | 466064 | 2.9455 | 0.00161 |
| ENSG00000109680 | TBC1D19  | 4  | 26578059 | 26756973 | 216  | 13  | 466064 | 2.1671 | 0.01511 |
| ENSG00000109787 | KLF3     | 4  | 38665817 | 38702663 | 98   | 22  | 466064 | 1.6546 | 0.04901 |
| ENSG00000110169 | HPX      | 11 | 6452279  | 6463847  | 25   | 8   | 466064 | 1.9502 | 0.02557 |
| ENSG00000110400 | PVRL1    | 11 | 1.19E+08 | 1.2E+08  | 313  | 17  | 466064 | 2.6512 | 0.00401 |
| ENSG00000110422 | HIPK3    | 11 | 33278218 | 33378569 | 213  | 29  | 466064 | 1.9653 | 0.02469 |
| ENSG00000111262 | KCNA1    | 12 | 5019071  | 5040527  | 85   | 16  | 466064 | 1.799  | 0.03601 |
| ENSG00000111321 | LTBR     | 12 | 6484211  | 6500733  | 73   | 5   | 466064 | 1.7146 | 0.04321 |
| ENSG00000111339 | ART4     | 12 | 14978503 | 14996429 | 79   | 10  | 466064 | 1.9907 | 0.02326 |
| ENSG00000111450 | STX2     | 12 | 1.31E+08 | 1.31E+08 | 177  | 23  | 466064 | 1.9769 | 0.02402 |
| ENSG00000111731 | C2CD5    | 12 | 22601517 | 22697480 | 167  | 16  | 466064 | 1.9962 | 0.02296 |
| ENSG00000111860 | CEP85L   | 6  | 1.19E+08 | 1.19E+08 | 779  | 27  | 466064 | 2.1388 | 0.01623 |
| ENSG00000112029 | FBXO5    | 6  | 1.53E+08 | 1.53E+08 | 74   | 8   | 466064 | 2.1415 | 0.01612 |
| ENSG00000112033 | PPARD    | 6  | 35310335 | 35395968 | 173  | 18  | 466064 | 1.7005 | 0.04452 |
| ENSG00000112096 | SOD2     | 6  | 1.6E+08  | 1.6E+08  | 236  | 42  | 466064 | 2.2064 | 0.01368 |
| ENSG00000112200 | ZNF451   | 6  | 56951642 | 57035105 | 155  | 10  | 466064 | 2.1554 | 0.01557 |
| ENSG00000112208 | BAG2     | 6  | 57037124 | 57054631 | 24   | 6   | 466064 | 2.4651 | 0.00685 |
| ENSG00000112210 | RAB23    | 6  | 57053607 | 57087078 | 38   | 8   | 466064 | 2.1441 | 0.01601 |
| ENSG00000112234 | FBXL4    | 6  | 99316420 | 99395849 | 251  | 23  | 466064 | 2.3382 | 0.00969 |
| ENSG00000112294 | ALDH5A1  | 6  | 24495080 | 24537435 | 168  | 23  | 466064 | 1.6941 | 0.04513 |
| ENSG00000112378 | PERP     | 6  | 1.38E+08 | 1.38E+08 | 45   | 11  | 466064 | 1.9864 | 0.0235  |
| ENSG00000112511 | PHF1     | 6  | 33378176 | 33384230 | 14   | 6   | 466064 | 2.3802 | 0.00865 |
| ENSG00000112706 | IMPG1    | 6  | 76630832 | 76782395 | 525  | 41  | 466064 | 1.9041 | 0.02845 |
| ENSG00000112759 | SLC29A1  | 6  | 44187242 | 44201888 | 38   | 11  | 466064 | 1.6454 | 0.04994 |

|                 |            |    |          |          |      |    |        |        |         |
|-----------------|------------|----|----------|----------|------|----|--------|--------|---------|
| ENSG00000112964 | GHR        | 5  | 42423879 | 42721979 | 580  | 32 | 466064 | 1.6672 | 0.04774 |
| ENSG00000112984 | KIF20A     | 5  | 1.38E+08 | 1.38E+08 | 11   | 4  | 466064 | 1.8229 | 0.03416 |
| ENSG00000113161 | HMGCR      | 5  | 74632154 | 74657929 | 88   | 15 | 466064 | 1.9267 | 0.02701 |
| ENSG00000113391 | FAM172A    | 5  | 92953775 | 93447404 | 939  | 56 | 466064 | 2.4479 | 0.00718 |
| ENSG00000113552 | GNPDA1     | 5  | 1.41E+08 | 1.41E+08 | 51   | 9  | 466064 | 2.5203 | 0.00586 |
| ENSG00000113658 | SMAD5      | 5  | 1.35E+08 | 1.36E+08 | 154  | 24 | 466064 | 2.0814 | 0.0187  |
| ENSG00000113966 | ARL6       | 3  | 97483365 | 97519953 | 30   | 11 | 466064 | 2.3049 | 0.01059 |
| ENSG00000114125 | RNF7       | 3  | 1.41E+08 | 1.41E+08 | 25   | 4  | 466064 | 2.5755 | 0.005   |
| ENSG00000114383 | TUSC2      | 3  | 50357458 | 50365682 | 11   | 5  | 466064 | 1.6803 | 0.04645 |
| ENSG00000114439 | BBX        | 3  | 1.07E+08 | 1.08E+08 | 804  | 51 | 466064 | 2.2666 | 0.01171 |
| ENSG00000114450 | GNB4       | 3  | 1.79E+08 | 1.79E+08 | 120  | 18 | 466064 | 2.0852 | 0.01853 |
| ENSG00000114767 | RRP9       | 3  | 51967446 | 51975957 | 4    | 2  | 466064 | 2.3389 | 0.00967 |
| ENSG00000114933 | INO80D     | 2  | 2.07E+08 | 2.07E+08 | 313  | 23 | 466064 | 2.9725 | 0.00148 |
| ENSG00000114982 | KANSL3     | 2  | 97258907 | 97308524 | 2    | 1  | 466064 | 2.4116 | 0.00794 |
| ENSG00000115073 | ACTR1B     | 2  | 98272431 | 98280570 | 44   | 5  | 466064 | 1.9106 | 0.02803 |
| ENSG00000115085 | ZAP70      | 2  | 98330023 | 98356325 | 84   | 15 | 466064 | 2.0224 | 0.02157 |
| ENSG00000115163 | CENPA      | 2  | 26987157 | 27023935 | 43   | 5  | 466064 | 2.7816 | 0.0027  |
| ENSG00000115165 | CYTIP      | 2  | 1.58E+08 | 1.58E+08 | 328  | 26 | 466064 | 1.9431 | 0.026   |
| ENSG00000115239 | GPR75-ASB3 | 2  | 53759810 | 54087170 | 891  | 29 | 466064 | 1.7855 | 0.03709 |
| ENSG00000115274 | INO80B     | 2  | 74682150 | 74688011 | 9    | 2  | 466064 | 2.4702 | 0.00675 |
| ENSG00000115275 | MOGS       | 2  | 74688184 | 74692537 | 10   | 2  | 466064 | 2.4481 | 0.00718 |
| ENSG00000115282 | TTC31      | 2  | 74710200 | 74722013 | 14   | 3  | 466064 | 2.719  | 0.00327 |
| ENSG00000115289 | PCGF1      | 2  | 74732170 | 74735707 | 5    | 2  | 466064 | 2.9306 | 0.00169 |
| ENSG00000115318 | LOXL3      | 2  | 74759541 | 74782817 | 78   | 8  | 466064 | 1.8278 | 0.03379 |
| ENSG00000115325 | DOK1       | 2  | 74776153 | 74784681 | 25   | 5  | 466064 | 1.9587 | 0.02507 |
| ENSG00000115414 | FN1        | 2  | 2.16E+08 | 2.16E+08 | 200  | 21 | 466064 | 1.8207 | 0.03433 |
| ENSG00000115507 | OTX1       | 2  | 63277192 | 63284971 | 16   | 2  | 466064 | 1.7528 | 0.03982 |
| ENSG00000115514 | TXNDC9     | 2  | 99935445 | 99957165 | 48   | 7  | 466064 | 1.9974 | 0.02289 |
| ENSG00000115592 | PRKAG3     | 2  | 2.2E+08  | 2.2E+08  | 27   | 5  | 466064 | 2.0358 | 0.02088 |
| ENSG00000115593 | SMYD1      | 2  | 88367299 | 88412906 | 128  | 17 | 466064 | 2.0353 | 0.02091 |
| ENSG00000115594 | IL1R1      | 2  | 1.03E+08 | 1.03E+08 | 295  | 25 | 466064 | 2.4851 | 0.00648 |
| ENSG00000115598 | IL1RL2     | 2  | 1.03E+08 | 1.03E+08 | 54   | 15 | 466064 | 1.6862 | 0.04588 |
| ENSG00000115685 | PPP1R7     | 2  | 2.42E+08 | 2.42E+08 | 79   | 7  | 466064 | 1.6991 | 0.04465 |
| ENSG00000115738 | ID2        | 2  | 8818975  | 8824583  | 6    | 3  | 466064 | 1.689  | 0.04561 |
| ENSG00000116030 | SUMO1      | 2  | 2.03E+08 | 2.03E+08 | 41   | 10 | 466064 | 2.1995 | 0.01392 |
| ENSG00000116191 | RALGPS2    | 1  | 1.79E+08 | 1.79E+08 | 440  | 29 | 466064 | 1.6689 | 0.04757 |
| ENSG00000116194 | ANGPTL1    | 1  | 1.79E+08 | 1.79E+08 | 50   | 9  | 466064 | 1.7972 | 0.03615 |
| ENSG00000116237 | ICMT       | 1  | 6281253  | 6296032  | 40   | 7  | 466064 | 1.9669 | 0.0246  |
| ENSG00000116299 | KIAA1324   | 1  | 1.1E+08  | 1.1E+08  | 191  | 34 | 466064 | 1.8462 | 0.03244 |
| ENSG00000116688 | MFN2       | 1  | 12040238 | 12073571 | 73   | 14 | 466064 | 1.7217 | 0.04256 |
| ENSG00000116819 | TFAP2E     | 1  | 36038971 | 36060929 | 12   | 4  | 466064 | 2.2084 | 0.01361 |
| ENSG00000117000 | RLF        | 1  | 40627045 | 40706593 | 195  | 23 | 466064 | 2.0362 | 0.02087 |
| ENSG00000117122 | MFAP2      | 1  | 17300997 | 17307330 | 54   | 5  | 466064 | 1.752  | 0.03989 |
| ENSG00000117298 | ECE1       | 1  | 21543740 | 21671997 | 509  | 52 | 466064 | 1.9573 | 0.02515 |
| ENSG00000117505 | DR1        | 1  | 93811445 | 93835055 | 84   | 9  | 466064 | 2.0917 | 0.01823 |
| ENSG00000117616 | C1orf63    | 1  | 25568728 | 25664704 | 94   | 19 | 466064 | 1.6847 | 0.04602 |
| ENSG00000117640 | MTRF1L     | 1  | 26145131 | 26159432 | 36   | 7  | 466064 | 1.7758 | 0.03788 |
| ENSG00000117697 | NSL1       | 1  | 2.13E+08 | 2.13E+08 | 231  | 33 | 466064 | 1.8826 | 0.02988 |
| ENSG00000117859 | OSBPL9     | 1  | 52042851 | 52254889 | 292  | 20 | 466064 | 1.8436 | 0.03262 |
| ENSG00000118402 | ELOVL4     | 6  | 80624529 | 80657297 | 141  | 19 | 466064 | 2.0356 | 0.0209  |
| ENSG00000118473 | SGIP1      | 1  | 66999066 | 67213982 | 694  | 42 | 466064 | 1.7939 | 0.03641 |
| ENSG00000118491 | ZC2HC1B    | 6  | 1.44E+08 | 1.44E+08 | 160  | 19 | 466064 | 2.6676 | 0.00382 |
| ENSG00000118518 | RNF146     | 6  | 1.28E+08 | 1.28E+08 | 57   | 7  | 466064 | 1.8386 | 0.03299 |
| ENSG00000118816 | CCNI       | 4  | 77968311 | 77997158 | 100  | 7  | 466064 | 2.8249 | 0.00236 |
| ENSG00000118894 | FAM86A     | 16 | 5134305  | 5147809  | 110  | 15 | 466064 | 2.2109 | 0.01352 |
| ENSG00000118972 | FGF23      | 12 | 4477393  | 4488894  | 23   | 5  | 466064 | 1.7548 | 0.03965 |
| ENSG00000119139 | TJP2       | 9  | 71736209 | 71870124 | 297  | 18 | 466064 | 1.8256 | 0.03395 |
| ENSG00000119314 | PTBP3      | 9  | 1.15E+08 | 1.15E+08 | 374  | 35 | 466064 | 2.2876 | 0.01108 |
| ENSG00000119321 | FKBP15     | 9  | 1.16E+08 | 1.16E+08 | 226  | 34 | 466064 | 1.8642 | 0.03115 |
| ENSG00000119457 | SLC46A2    | 9  | 1.16E+08 | 1.16E+08 | 39   | 11 | 466064 | 2.1241 | 0.01683 |
| ENSG00000119487 | MAPKAP1    | 9  | 1.28E+08 | 1.28E+08 | 571  | 42 | 466064 | 1.7534 | 0.03977 |
| ENSG00000119535 | CSF3R      | 1  | 36931644 | 36948879 | 51   | 14 | 466064 | 1.8396 | 0.03291 |
| ENSG00000119640 | ACYP1      | 14 | 75519924 | 75536186 | 41   | 8  | 466064 | 1.8271 | 0.03384 |
| ENSG00000119729 | RHOQ       | 2  | 46768945 | 46810260 | 194  | 27 | 466064 | 1.9733 | 0.02423 |
| ENSG00000119771 | KLHL29     | 2  | 23608088 | 23931481 | 1032 | 42 | 466064 | 1.7862 | 0.03704 |
| ENSG00000119778 | ATAD2B     | 2  | 23971534 | 24149984 | 540  | 25 | 466064 | 2.5596 | 0.00524 |
| ENSG00000119943 | PYROXD2    | 10 | 1E+08    | 1E+08    | 70   | 10 | 466064 | 2.0114 | 0.02214 |
| ENSG00000120093 | HOXB3      | 17 | 46626232 | 46682274 | 2    | 1  | 466064 | 1.875  | 0.0304  |
| ENSG00000120235 | IFNA6      | 9  | 21349834 | 21351377 | 5    | 2  | 466064 | 2.1227 | 0.01689 |
| ENSG00000120329 | SLC25A2    | 5  | 1.41E+08 | 1.41E+08 | 2    | 1  | 466064 | 1.7607 | 0.03914 |
| ENSG00000120686 | UFM1       | 13 | 38923986 | 38937140 | 49   | 12 | 466064 | 3.3129 | 0.00046 |
| ENSG00000120708 | TGFB1      | 5  | 1.35E+08 | 1.35E+08 | 47   | 9  | 466064 | 1.8    | 0.03593 |
| ENSG00000120729 | MYOT       | 5  | 1.37E+08 | 1.37E+08 | 62   | 8  | 466064 | 1.9192 | 0.02748 |

|                 |              |    |          |          |      |     |        |        |         |
|-----------------|--------------|----|----------|----------|------|-----|--------|--------|---------|
| ENSG00000120798 | NR2C1        | 12 | 95414005 | 95467479 | 262  | 15  | 466064 | 1.9671 | 0.02458 |
| ENSG00000120889 | TNFRSF10B    | 8  | 22877646 | 22926692 | 184  | 37  | 466064 | 3.3152 | 0.00046 |
| ENSG00000120925 | RNF170       | 8  | 42704780 | 42752433 | 211  | 8   | 466064 | 1.9054 | 0.02837 |
| ENSG00000121067 | SPOP         | 17 | 47676246 | 47755596 | 176  | 29  | 466064 | 3.0644 | 0.00109 |
| ENSG00000121152 | NCAPH        | 2  | 97001525 | 97039583 | 59   | 8   | 466064 | 2.3191 | 0.01019 |
| ENSG00000121388 | RP11-408E5.4 | 13 | 19756173 | 19761496 | 14   | 5   | 466064 | 2.0041 | 0.02253 |
| ENSG00000121797 | CCRL2        | 3  | 46448654 | 46454488 | 19   | 5   | 466064 | 1.876  | 0.03033 |
| ENSG00000121807 | CCR2         | 3  | 46395225 | 46402419 | 18   | 3   | 466064 | 2.325  | 0.01004 |
| ENSG00000121900 | TMEM54       | 1  | 33360195 | 33367039 | 17   | 5   | 466064 | 1.6967 | 0.04487 |
| ENSG00000122223 | CD244        | 1  | 1.61E+08 | 1.61E+08 | 77   | 7   | 466064 | 1.8228 | 0.03416 |
| ENSG00000122304 | PRM2         | 16 | 11369496 | 11370337 | 5    | 2   | 466064 | 2.0346 | 0.02095 |
| ENSG00000122390 | NAA60        | 16 | 3493611  | 3536963  | 96   | 15  | 466064 | 1.7456 | 0.04044 |
| ENSG00000122420 | PTGFR        | 1  | 78769568 | 79005434 | 924  | 37  | 466064 | 2.1568 | 0.01551 |
| ENSG00000122435 | TRMT13       | 1  | 1.01E+08 | 1.01E+08 | 54   | 6   | 466064 | 2.1781 | 0.0147  |
| ENSG00000122565 | CBX3         | 7  | 26240782 | 26252976 | 27   | 9   | 466064 | 1.8961 | 0.02898 |
| ENSG00000122691 | TWIST1       | 7  | 19060614 | 19157295 | 237  | 37  | 466064 | 1.6811 | 0.04637 |
| ENSG00000122729 | ACO1         | 9  | 32384618 | 32454767 | 180  | 29  | 466064 | 2.0435 | 0.0205  |
| ENSG00000123094 | RASSF8       | 12 | 26111962 | 26232825 | 367  | 30  | 466064 | 2.2259 | 0.01301 |
| ENSG00000123104 | ITPR2        | 12 | 26490342 | 26986131 | 1548 | 82  | 466064 | 1.6607 | 0.04839 |
| ENSG00000123405 | NFE2         | 12 | 54685895 | 54694905 | 35   | 8   | 466064 | 1.7958 | 0.03627 |
| ENSG00000123407 | HOXC12       | 12 | 54348618 | 54352740 | 2    | 1   | 466064 | 1.814  | 0.03484 |
| ENSG00000123444 | KBTBD4       | 11 | 47593749 | 47600567 | 9    | 6   | 466064 | 1.7053 | 0.04407 |
| ENSG00000124067 | SLC12A4      | 16 | 67977377 | 68003504 | 33   | 7   | 466064 | 2.2326 | 0.01279 |
| ENSG00000124089 | MC3R         | 20 | 54823788 | 54824871 | 4    | 2   | 466064 | 2.0399 | 0.02068 |
| ENSG00000124092 | CTCF         | 20 | 56071035 | 56100708 | 49   | 6   | 466064 | 1.9313 | 0.02672 |
| ENSG00000124157 | SEMG2        | 20 | 43849941 | 43853099 | 3    | 1   | 466064 | 1.6882 | 0.04569 |
| ENSG00000124253 | PCK1         | 20 | 56136136 | 56141513 | 15   | 5   | 466064 | 1.7491 | 0.04014 |
| ENSG00000124299 | PEPD         | 19 | 33877856 | 34012700 | 367  | 43  | 466064 | 2.0798 | 0.01877 |
| ENSG00000124743 | KLHL31       | 6  | 53512699 | 53530506 | 71   | 11  | 466064 | 2.1208 | 0.01697 |
| ENSG00000124787 | RPP40        | 6  | 4994966  | 5004297  | 48   | 9   | 466064 | 1.9201 | 0.02742 |
| ENSG00000124788 | ATXN1        | 6  | 16299343 | 16761722 | 1460 | 157 | 466064 | 2.1167 | 0.01714 |
| ENSG00000124802 | EEF1E1       | 6  | 8073593  | 8102811  | 85   | 13  | 466064 | 1.6557 | 0.04889 |
| ENSG00000125149 | C16orf70     | 16 | 67143861 | 67182442 | 32   | 10  | 466064 | 1.8853 | 0.0297  |
| ENSG00000125820 | NKX2-2       | 20 | 21491648 | 21494664 | 9    | 4   | 466064 | 2.9915 | 0.00139 |
| ENSG00000125912 | NCLN         | 19 | 3185561  | 3209573  | 97   | 9   | 466064 | 1.6731 | 0.04715 |
| ENSG00000126249 | PDCD2L       | 19 | 34895289 | 34917073 | 45   | 6   | 466064 | 1.7544 | 0.03968 |
| ENSG00000126261 | UBA2         | 19 | 34919257 | 34960853 | 137  | 8   | 466064 | 2.0142 | 0.02199 |
| ENSG00000126603 | GLIS2        | 16 | 4364762  | 4389598  | 63   | 11  | 466064 | 2.4223 | 0.00771 |
| ENSG00000126934 | MAP2K2       | 19 | 4090319  | 4124126  | 89   | 17  | 466064 | 1.7814 | 0.03742 |
| ENSG00000127334 | DYRK2        | 12 | 68042118 | 68059186 | 51   | 13  | 466064 | 2.0469 | 0.02034 |
| ENSG00000127418 | FGFRL1       | 4  | 1003724  | 1020685  | 62   | 14  | 466064 | 1.9054 | 0.02837 |
| ENSG00000127423 | AUNIP        | 1  | 26158414 | 26185903 | 81   | 12  | 466064 | 2.0505 | 0.02016 |
| ENSG00000127527 | EPS15L1      | 19 | 16466050 | 16582896 | 264  | 23  | 466064 | 2.6992 | 0.00348 |
| ENSG00000127528 | KLF2         | 19 | 16435628 | 16438685 | 5    | 3   | 466064 | 1.8999 | 0.02872 |
| ENSG00000127774 | EMC6         | 17 | 3572109  | 3572962  | 8    | 4   | 466064 | 1.842  | 0.03274 |
| ENSG00000128284 | APOL3        | 22 | 36536372 | 36562225 | 84   | 17  | 466064 | 2.4409 | 0.00732 |
| ENSG00000128536 | CDHR3        | 7  | 1.06E+08 | 1.06E+08 | 425  | 49  | 466064 | 2.0102 | 0.02221 |
| ENSG00000128610 | FEZF1        | 7  | 1.22E+08 | 1.22E+08 | 23   | 6   | 466064 | 1.6918 | 0.04534 |
| ENSG00000128881 | TTBK2        | 15 | 43030932 | 43213007 | 177  | 25  | 466064 | 1.8949 | 0.02905 |
| ENSG00000129292 | PHF20L1      | 8  | 1.34E+08 | 1.34E+08 | 336  | 42  | 466064 | 1.7578 | 0.03939 |
| ENSG00000129450 | SIGLEC9      | 19 | 51628165 | 51639908 | 5    | 2   | 466064 | 1.8985 | 0.02881 |
| ENSG00000129465 | RIPK3        | 14 | 24805227 | 24809251 | 14   | 5   | 466064 | 1.9186 | 0.02752 |
| ENSG00000129480 | DTD2         | 14 | 31915242 | 31926716 | 50   | 10  | 466064 | 1.7677 | 0.03855 |
| ENSG00000130508 | PXDN         | 2  | 1635659  | 1748624  | 402  | 47  | 466064 | 1.8151 | 0.03475 |
| ENSG00000130684 | ZNF337       | 20 | 25654851 | 25677477 | 43   | 9   | 466064 | 2.1125 | 0.01732 |
| ENSG00000130695 | CEP85        | 1  | 26560691 | 26605299 | 93   | 17  | 466064 | 1.7922 | 0.03655 |
| ENSG00000131236 | CAP1         | 1  | 40505905 | 40538321 | 106  | 12  | 466064 | 2.1498 | 0.01579 |
| ENSG00000131238 | PPT1         | 1  | 40538379 | 40563375 | 113  | 10  | 466064 | 1.7048 | 0.04411 |
| ENSG00000131370 | SH3BP5       | 3  | 15296360 | 15382875 | 252  | 30  | 466064 | 2.5393 | 0.00555 |
| ENSG00000131504 | DIAPH1       | 5  | 1.41E+08 | 1.41E+08 | 243  | 17  | 466064 | 2.3647 | 0.00902 |
| ENSG00000131591 | C1orf159     | 1  | 1017198  | 1051741  | 96   | 11  | 466064 | 1.8628 | 0.03124 |
| ENSG00000132130 | LHX1         | 17 | 35294084 | 35301917 | 24   | 4   | 466064 | 3.0202 | 0.00126 |
| ENSG00000132321 | IQCA1        | 2  | 2.37E+08 | 2.37E+08 | 509  | 47  | 466064 | 2.4916 | 0.00636 |
| ENSG00000132846 | ZBED3        | 5  | 76367897 | 76383148 | 43   | 7   | 466064 | 1.7055 | 0.04405 |
| ENSG00000133226 | SRRM1        | 1  | 24958207 | 24999758 | 147  | 17  | 466064 | 1.7252 | 0.04224 |
| ENSG00000133488 | SEC14L4      | 22 | 30884900 | 30901698 | 36   | 8   | 466064 | 1.8235 | 0.03411 |
| ENSG00000133706 | LARS         | 5  | 1.45E+08 | 1.46E+08 | 150  | 14  | 466064 | 1.8485 | 0.03226 |
| ENSG00000133789 | SWAP70       | 11 | 9685624  | 9774538  | 313  | 15  | 466064 | 2.2995 | 0.01074 |
| ENSG00000133835 | HSD17B4      | 5  | 1.19E+08 | 1.19E+08 | 398  | 31  | 466064 | 2.5609 | 0.00522 |
| ENSG00000134278 | SPIRE1       | 18 | 12446511 | 12658133 | 602  | 32  | 466064 | 2.5455 | 0.00546 |
| ENSG00000134460 | IL2RA        | 10 | 6052652  | 6104288  | 193  | 35  | 466064 | 1.6834 | 0.04615 |
| ENSG00000135048 | TMEM2        | 9  | 74298282 | 74431606 | 417  | 42  | 466064 | 1.807  | 0.03538 |
| ENSG00000135063 | FAM189A2     | 9  | 71939488 | 72007371 | 133  | 27  | 466064 | 2.35   | 0.00939 |

|                 |           |    |          |          |      |     |        |        |          |
|-----------------|-----------|----|----------|----------|------|-----|--------|--------|----------|
| ENSG00000135144 | DTX1      | 12 | 1.13E+08 | 1.14E+08 | 120  | 29  | 466064 | 1.886  | 0.02965  |
| ENSG00000135299 | ANKRD6    | 6  | 90142889 | 90343553 | 415  | 35  | 466064 | 1.8519 | 0.03202  |
| ENSG00000135636 | DYSF      | 2  | 71680852 | 71913898 | 597  | 57  | 466064 | 1.8607 | 0.0314   |
| ENSG00000135637 | CCDC142   | 2  | 74699113 | 74710535 | 42   | 2   | 466064 | 2.372  | 0.00885  |
| ENSG00000135722 | FBXL8     | 16 | 67193834 | 67198473 | 8    | 3   | 466064 | 1.9646 | 0.02473  |
| ENSG00000135740 | SLC9A5    | 16 | 67271586 | 67306093 | 45   | 10  | 466064 | 1.7381 | 0.0411   |
| ENSG00000135747 | ZNF670    | 1  | 2.47E+08 | 2.47E+08 | 519  | 33  | 466064 | 1.7181 | 0.04289  |
| ENSG00000135899 | SP110     | 2  | 2.31E+08 | 2.31E+08 | 138  | 20  | 466064 | 1.7323 | 0.04161  |
| ENSG00000135940 | COX5B     | 2  | 98262503 | 98264846 | 7    | 3   | 466064 | 2.1041 | 0.01769  |
| ENSG00000135951 | TSGA10    | 2  | 99613724 | 99771427 | 421  | 25  | 466064 | 1.6485 | 0.04962  |
| ENSG00000135976 | ANKRD36   | 2  | 97779233 | 97930258 | 299  | 17  | 466064 | 1.9187 | 0.02751  |
| ENSG00000136059 | VILL      | 3  | 38029550 | 38048679 | 54   | 11  | 466064 | 2.4164 | 0.00784  |
| ENSG00000136141 | LRCH1     | 13 | 47127303 | 47327175 | 563  | 44  | 466064 | 1.7941 | 0.0364   |
| ENSG00000136279 | DBNL      | 7  | 44084239 | 44109055 | 65   | 13  | 466064 | 1.6583 | 0.04863  |
| ENSG00000136425 | CIB2      | 15 | 78396948 | 78423886 | 56   | 14  | 466064 | 2.0357 | 0.02089  |
| ENSG00000136541 | ERMN      | 2  | 1.58E+08 | 1.58E+08 | 18   | 9   | 466064 | 3.5562 | 0.00019  |
| ENSG00000136542 | GALNT5    | 2  | 1.58E+08 | 1.58E+08 | 174  | 19  | 466064 | 3.8604 | 5.66E-05 |
| ENSG00000136574 | GATA4     | 8  | 11534468 | 11617511 | 342  | 25  | 466064 | 1.8748 | 0.03041  |
| ENSG00000136758 | YME1L1    | 10 | 27399383 | 27444195 | 201  | 20  | 466064 | 1.9924 | 0.02317  |
| ENSG00000136867 | SLC31A2   | 9  | 1.16E+08 | 1.16E+08 | 47   | 12  | 466064 | 1.9528 | 0.02542  |
| ENSG00000137103 | TMEM8B    | 9  | 35814448 | 35854844 | 70   | 11  | 466064 | 1.8072 | 0.03536  |
| ENSG00000137124 | ALDH1B1   | 9  | 38392661 | 38398658 | 29   | 10  | 466064 | 2.3024 | 0.01066  |
| ENSG00000137142 | IGFBPL1   | 9  | 38408991 | 38424444 | 63   | 13  | 466064 | 1.9922 | 0.02318  |
| ENSG00000137185 | ZSCAN9    | 6  | 28192664 | 28201260 | 25   | 5   | 466064 | 1.8947 | 0.02907  |
| ENSG00000137310 | TCF19     | 6  | 31126319 | 31134936 | 73   | 12  | 466064 | 1.7291 | 0.0419   |
| ENSG00000137338 | PGBD1     | 6  | 28249314 | 28270326 | 50   | 13  | 466064 | 1.8691 | 0.0308   |
| ENSG00000137343 | ATAT1     | 6  | 30594619 | 30614600 | 74   | 7   | 466064 | 2.225  | 0.01304  |
| ENSG00000137440 | FGFBP1    | 4  | 15937192 | 15940363 | 7    | 2   | 466064 | 1.8532 | 0.03193  |
| ENSG00000137727 | ARHGAP20  | 11 | 1.1E+08  | 1.11E+08 | 385  | 24  | 466064 | 2.0662 | 0.0194   |
| ENSG00000137878 | GCOM1     | 5  | 57884106 | 58006943 | 425  | 26  | 466064 | 1.7482 | 0.04021  |
| ENSG00000138018 | EPT1      | 2  | 26531415 | 26618759 | 248  | 36  | 466064 | 2.3082 | 0.0105   |
| ENSG00000138166 | DUSP5     | 10 | 1.12E+08 | 1.12E+08 | 43   | 6   | 466064 | 2.0666 | 0.01939  |
| ENSG00000138172 | CALHM2    | 10 | 1.05E+08 | 1.05E+08 | 19   | 2   | 466064 | 2.8481 | 0.0022   |
| ENSG00000138185 | ENTPD1    | 10 | 97471536 | 97637023 | 367  | 37  | 466064 | 2.5698 | 0.00509  |
| ENSG00000138443 | ABI2      | 2  | 2.04E+08 | 2.04E+08 | 366  | 41  | 466064 | 2.5113 | 0.00601  |
| ENSG00000138696 | BMPR1B    | 4  | 95679119 | 96079599 | 1461 | 70  | 466064 | 3.1214 | 0.0009   |
| ENSG00000138758 | 11-Sep    | 4  | 77870856 | 77961537 | 219  | 18  | 466064 | 2.4541 | 0.00706  |
| ENSG00000138759 | FRAS1     | 4  | 78978724 | 79465423 | 1119 | 70  | 466064 | 1.8321 | 0.03347  |
| ENSG00000139190 | VAMP1     | 12 | 6571403  | 6580153  | 14   | 4   | 466064 | 1.7    | 0.04457  |
| ENSG00000139209 | SLC38A4   | 12 | 47158546 | 47226191 | 219  | 29  | 466064 | 2.1112 | 0.01738  |
| ENSG00000139233 | LLPH      | 12 | 66516842 | 66524548 | 43   | 7   | 466064 | 2.3144 | 0.01032  |
| ENSG00000139737 | SLAIN1    | 13 | 78272023 | 78338377 | 146  | 13  | 466064 | 1.6653 | 0.04792  |
| ENSG00000139826 | ABHD13    | 13 | 1.09E+08 | 1.09E+08 | 43   | 9   | 466064 | 1.9127 | 0.02789  |
| ENSG00000139874 | SSTR1     | 14 | 38677204 | 38682272 | 33   | 3   | 466064 | 2.6533 | 0.00399  |
| ENSG00000139988 | RDH12     | 14 | 68168603 | 68201169 | 40   | 4   | 466064 | 1.6589 | 0.04857  |
| ENSG00000140105 | WARS      | 14 | 1.01E+08 | 1.01E+08 | 193  | 32  | 466064 | 2.208  | 0.01362  |
| ENSG00000140107 | SLC25A47  | 14 | 1.01E+08 | 1.01E+08 | 10   | 5   | 466064 | 2.4816 | 0.00654  |
| ENSG00000140443 | IGF1R     | 15 | 99192200 | 99507759 | 1082 | 67  | 466064 | 2.1756 | 0.01479  |
| ENSG00000140937 | CDH11     | 16 | 64977656 | 65160015 | 578  | 43  | 466064 | 1.9365 | 0.02641  |
| ENSG00000140939 | NOL3      | 16 | 67204057 | 67209643 | 13   | 3   | 466064 | 1.8162 | 0.03467  |
| ENSG00000140945 | CDH13     | 16 | 82660408 | 83830204 | 6558 | 320 | 466064 | 2.2868 | 0.0111   |
| ENSG00000141096 | DPEP3     | 16 | 68009566 | 68014732 | 9    | 2   | 466064 | 1.65   | 0.04947  |
| ENSG00000141867 | BRD4      | 19 | 15347647 | 15443356 | 142  | 15  | 466064 | 2.5558 | 0.0053   |
| ENSG00000141977 | CIB3      | 19 | 16272179 | 16284336 | 27   | 10  | 466064 | 2.161  | 0.01535  |
| ENSG00000141985 | SH3GL1    | 19 | 4360367  | 4400544  | 99   | 20  | 466064 | 1.805  | 0.03554  |
| ENSG00000142025 | DMRTC2    | 19 | 42348806 | 42356401 | 10   | 2   | 466064 | 2.6107 | 0.00452  |
| ENSG00000142459 | EVI5L     | 19 | 7895119  | 7929862  | 97   | 24  | 466064 | 2.6562 | 0.00395  |
| ENSG00000142515 | KLK3      | 19 | 51358171 | 51364020 | 30   | 4   | 466064 | 1.8058 | 0.03547  |
| ENSG00000142609 | C1orf222  | 1  | 1853396  | 1935276  | 163  | 17  | 466064 | 2.1708 | 0.01497  |
| ENSG00000142751 | GPN2      | 1  | 27202624 | 27216788 | 24   | 8   | 466064 | 1.8984 | 0.02882  |
| ENSG00000142789 | CELA3A    | 1  | 22328149 | 22339032 | 25   | 8   | 466064 | 2.6053 | 0.00459  |
| ENSG00000142798 | HSPG2     | 1  | 22148738 | 22263790 | 523  | 40  | 466064 | 2.4826 | 0.00652  |
| ENSG00000143079 | CTTNBP2NL | 1  | 1.13E+08 | 1.13E+08 | 77   | 13  | 466064 | 2.2272 | 0.01297  |
| ENSG00000143162 | CREG1     | 1  | 1.67E+08 | 1.68E+08 | 80   | 22  | 466064 | 2.0203 | 0.02168  |
| ENSG00000143199 | ADCY10    | 1  | 1.68E+08 | 1.68E+08 | 391  | 52  | 466064 | 1.7635 | 0.03891  |
| ENSG00000143340 | FAM163A   | 1  | 1.8E+08  | 1.8E+08  | 289  | 21  | 466064 | 2.2885 | 0.01105  |
| ENSG00000143365 | RORC      | 1  | 1.52E+08 | 1.52E+08 | 56   | 6   | 466064 | 2.0503 | 0.02017  |
| ENSG00000143753 | DEGS1     | 1  | 2.24E+08 | 2.24E+08 | 25   | 4   | 466064 | 1.7682 | 0.03852  |
| ENSG00000143889 | HNRNPPLL  | 2  | 38789120 | 38830728 | 75   | 6   | 466064 | 1.8032 | 0.03568  |
| ENSG00000143891 | GALM      | 2  | 38893052 | 38968379 | 141  | 23  | 466064 | 1.818  | 0.03453  |
| ENSG00000143942 | CHAC2     | 2  | 53994929 | 54002333 | 16   | 4   | 466064 | 1.9458 | 0.02584  |
| ENSG00000144015 | TRIM43    | 2  | 96257766 | 96265526 | 7    | 4   | 466064 | 1.8795 | 0.03009  |
| ENSG00000144119 | C1QL2     | 2  | 1.2E+08  | 1.2E+08  | 4    | 2   | 466064 | 1.8106 | 0.0351   |

|                 |          |    |          |          |      |     |        |        |         |
|-----------------|----------|----|----------|----------|------|-----|--------|--------|---------|
| ENSG00000144290 | SLC4A10  | 2  | 1.62E+08 | 1.63E+08 | 1041 | 62  | 466064 | 2.3467 | 0.00947 |
| ENSG00000144524 | COPSTB   | 2  | 2.33E+08 | 2.33E+08 | 71   | 17  | 466064 | 1.9138 | 0.02782 |
| ENSG00000144635 | DYNC1LI1 | 3  | 32567463 | 32612366 | 175  | 22  | 466064 | 1.9654 | 0.02469 |
| ENSG00000144677 | CTDSPL   | 3  | 37903451 | 38025960 | 300  | 29  | 466064 | 1.7665 | 0.03866 |
| ENSG00000144736 | SHQ1     | 3  | 72798428 | 72911065 | 186  | 12  | 466064 | 2.9453 | 0.00161 |
| ENSG00000144962 | SPATA16  | 3  | 1.73E+08 | 1.73E+08 | 678  | 52  | 466064 | 1.6936 | 0.04517 |
| ENSG00000145198 | VWA5B2   | 3  | 1.84E+08 | 1.84E+08 | 22   | 6   | 466064 | 1.8466 | 0.0324  |
| ENSG00000145244 | CORIN    | 4  | 47596015 | 47840123 | 597  | 31  | 466064 | 2.2027 | 0.01381 |
| ENSG00000145703 | IQGAP2   | 5  | 75699074 | 76003957 | 957  | 45  | 466064 | 2.3094 | 0.01046 |
| ENSG00000145833 | DDX46    | 5  | 1.34E+08 | 1.34E+08 | 191  | 19  | 466064 | 1.8155 | 0.03473 |
| ENSG00000145979 | TBC1D7   | 6  | 13266774 | 13328815 | 291  | 15  | 466064 | 1.8534 | 0.03191 |
| ENSG00000146083 | RNF44    | 5  | 1.76E+08 | 1.76E+08 | 2    | 1   | 466064 | 2.5246 | 0.00579 |
| ENSG00000146112 | PPP1R18  | 6  | 30644166 | 30655672 | 18   | 7   | 466064 | 2.5962 | 0.00471 |
| ENSG00000146122 | DAAM2    | 6  | 39760142 | 39872648 | 377  | 46  | 466064 | 1.7613 | 0.0391  |
| ENSG00000146221 | TCTE1    | 6  | 44246480 | 44265458 | 53   | 16  | 466064 | 2.3814 | 0.00862 |
| ENSG00000146376 | ARHGAP18 | 6  | 1.3E+08  | 1.3E+08  | 350  | 45  | 466064 | 2.2949 | 0.01087 |
| ENSG00000146535 | GNA12    | 7  | 2767746  | 2883958  | 485  | 25  | 466064 | 1.8008 | 0.03587 |
| ENSG00000146670 | CDCA5    | 11 | 64833772 | 64851636 | 30   | 6   | 466064 | 1.7769 | 0.0378  |
| ENSG00000147324 | MFHAS1   | 8  | 8640864  | 8751155  | 630  | 34  | 466064 | 2.1815 | 0.01457 |
| ENSG00000147548 | WHSC1L1  | 8  | 38127215 | 38239790 | 143  | 17  | 466064 | 1.6855 | 0.04594 |
| ENSG00000147669 | POLR2K   | 8  | 1.01E+08 | 1.01E+08 | 15   | 5   | 466064 | 1.8044 | 0.03558 |
| ENSG00000147677 | EIF3H    | 8  | 1.18E+08 | 1.18E+08 | 302  | 33  | 466064 | 1.7848 | 0.03715 |
| ENSG00000147679 | UTP23    | 8  | 1.18E+08 | 1.18E+08 | 251  | 28  | 466064 | 2.2763 | 0.01141 |
| ENSG00000148057 | IDNK     | 9  | 86237964 | 86259045 | 36   | 5   | 466064 | 1.7701 | 0.03836 |
| ENSG00000148110 | HIATL1   | 9  | 97136833 | 97223324 | 221  | 20  | 466064 | 2.2064 | 0.01368 |
| ENSG00000148154 | UGCG     | 9  | 1.15E+08 | 1.15E+08 | 178  | 23  | 466064 | 1.8257 | 0.03395 |
| ENSG00000148356 | LRSAM1   | 9  | 1.3E+08  | 1.3E+08  | 155  | 34  | 466064 | 2.1143 | 0.01725 |
| ENSG00000148671 | ADIRF    | 10 | 88727949 | 88743691 | 89   | 7   | 466064 | 2.3416 | 0.0096  |
| ENSG00000148798 | INA      | 10 | 1.05E+08 | 1.05E+08 | 24   | 5   | 466064 | 1.8383 | 0.03301 |
| ENSG00000148834 | GSTO1    | 10 | 1.06E+08 | 1.06E+08 | 97   | 19  | 466064 | 2.3573 | 0.00921 |
| ENSG00000148835 | TAF5     | 10 | 1.05E+08 | 1.05E+08 | 97   | 7   | 466064 | 1.8505 | 0.03212 |
| ENSG00000148841 | ITPRIP   | 10 | 1.06E+08 | 1.06E+08 | 47   | 10  | 466064 | 2.8392 | 0.00226 |
| ENSG00000148843 | PDCD11   | 10 | 1.05E+08 | 1.05E+08 | 142  | 14  | 466064 | 2.3908 | 0.00841 |
| ENSG00000149043 | SYT8     | 11 | 1848709  | 1858751  | 55   | 7   | 466064 | 2.096  | 0.01804 |
| ENSG00000149124 | GLYAT    | 11 | 58407899 | 58499447 | 276  | 13  | 466064 | 2.4391 | 0.00736 |
| ENSG00000149488 | TMC2     | 20 | 2517253  | 2622430  | 363  | 29  | 466064 | 1.7666 | 0.03865 |
| ENSG00000149735 | GPHA2    | 11 | 64701943 | 64703360 | 3    | 2   | 466064 | 1.727  | 0.04208 |
| ENSG00000149809 | TM7SF2   | 11 | 64879317 | 64883856 | 5    | 2   | 466064 | 2.0645 | 0.01948 |
| ENSG00000150076 | C10ORF68 | 10 | 32832297 | 33171802 | 1147 | 57  | 466064 | 1.7241 | 0.04234 |
| ENSG00000151065 | DCP1B    | 12 | 2055220  | 2113701  | 170  | 31  | 466064 | 1.7477 | 0.04026 |
| ENSG00000151092 | NGLY1    | 3  | 25760435 | 25831530 | 119  | 13  | 466064 | 1.6611 | 0.04834 |
| ENSG00000151093 | OXSM     | 3  | 25824408 | 25836025 | 25   | 4   | 466064 | 1.7464 | 0.04037 |
| ENSG00000151276 | MAG11    | 3  | 65339200 | 66024509 | 2272 | 152 | 466064 | 1.6582 | 0.04864 |
| ENSG00000151338 | MIPOL1   | 14 | 37667118 | 38021566 | 796  | 50  | 466064 | 1.6681 | 0.04765 |
| ENSG00000151353 | TMEM18   | 2  | 667335   | 677439   | 24   | 4   | 466064 | 2.3756 | 0.00876 |
| ENSG00000151474 | FRMD4A   | 10 | 13685706 | 14504141 | 3375 | 236 | 466064 | 3.2302 | 0.00062 |
| ENSG00000151806 | GUF1     | 4  | 44680444 | 44702943 | 41   | 5   | 466064 | 1.9068 | 0.02828 |
| ENSG00000152192 | POU4F1   | 13 | 79172497 | 79177673 | 14   | 3   | 466064 | 1.7101 | 0.04362 |
| ENSG00000152193 | RNF219   | 13 | 79188426 | 79233314 | 168  | 22  | 466064 | 2.2667 | 0.01117 |
| ENSG00000152213 | ARL11    | 13 | 50202435 | 50208008 | 9    | 3   | 466064 | 2.3256 | 0.01002 |
| ENSG00000152422 | XRCC4    | 5  | 82373317 | 82649606 | 770  | 35  | 466064 | 1.8066 | 0.03541 |
| ENSG00000152583 | SPARCL1  | 4  | 88394487 | 88452213 | 57   | 17  | 466064 | 1.8839 | 0.02979 |
| ENSG00000152749 | GPR180   | 13 | 95254157 | 95286899 | 170  | 26  | 466064 | 1.6651 | 0.04795 |
| ENSG00000152894 | PTPRK    | 6  | 1.28E+08 | 1.29E+08 | 1394 | 57  | 466064 | 1.9062 | 0.02831 |
| ENSG00000153147 | SMARCA5  | 4  | 1.44E+08 | 1.44E+08 | 78   | 12  | 466064 | 1.8797 | 0.03008 |
| ENSG00000153253 | SCN3A    | 2  | 1.66E+08 | 1.66E+08 | 266  | 17  | 466064 | 1.8461 | 0.03244 |
| ENSG00000153406 | NMRAL1   | 16 | 4511681  | 4545764  | 86   | 10  | 466064 | 3.4026 | 0.00033 |
| ENSG00000153815 | CMIP     | 16 | 81478775 | 81745367 | 1154 | 114 | 466064 | 1.7302 | 0.0418  |
| ENSG00000153879 | CEBPG    | 19 | 33864236 | 33873592 | 30   | 6   | 466064 | 1.8557 | 0.03175 |
| ENSG00000153904 | DDAH1    | 1  | 85784164 | 86043933 | 903  | 38  | 466064 | 2.4432 | 0.00728 |
| ENSG00000153944 | MSI2     | 17 | 55333212 | 55762046 | 1211 | 89  | 466064 | 3.0012 | 0.00134 |
| ENSG00000154118 | JPH3     | 16 | 87635441 | 87731762 | 518  | 48  | 466064 | 1.6828 | 0.04621 |
| ENSG00000154328 | NEIL2    | 8  | 11627148 | 11644855 | 87   | 20  | 466064 | 1.655  | 0.04896 |
| ENSG00000154511 | FAM69A   | 1  | 93307724 | 93427057 | 263  | 14  | 466064 | 1.6578 | 0.04868 |
| ENSG00000155052 | CNTNAP5  | 2  | 1.25E+08 | 1.26E+08 | 2368 | 44  | 466064 | 2.3957 | 0.00829 |
| ENSG00000155363 | MOV10    | 1  | 1.13E+08 | 1.13E+08 | 88   | 16  | 466064 | 2.2151 | 0.01338 |
| ENSG00000155530 | LRGUK    | 7  | 1.34E+08 | 1.34E+08 | 327  | 14  | 466064 | 1.7071 | 0.04391 |
| ENSG00000155918 | RAET1L   | 6  | 1.5E+08  | 1.5E+08  | 51   | 6   | 466064 | 1.7426 | 0.0407  |
| ENSG00000155957 | TMBIM4   | 12 | 66517709 | 66563852 | 186  | 22  | 466064 | 2.2392 | 0.01257 |
| ENSG00000156136 | DCK      | 4  | 71858255 | 71896631 | 175  | 15  | 466064 | 1.7774 | 0.03775 |
| ENSG00000156374 | PCGF6    | 10 | 1.05E+08 | 1.05E+08 | 196  | 20  | 466064 | 2.4686 | 0.00678 |
| ENSG00000156384 | SFR1     | 10 | 1.06E+08 | 1.06E+08 | 12   | 2   | 466064 | 2.6789 | 0.00369 |
| ENSG00000156413 | FUT6     | 19 | 5830621  | 5839742  | 36   | 8   | 466064 | 2.5818 | 0.00491 |

|                 |          |    |          |          |      |    |        |        |          |
|-----------------|----------|----|----------|----------|------|----|--------|--------|----------|
| ENSG00000156463 | SH3RF2   | 5  | 1.45E+08 | 1.45E+08 | 281  | 15 | 466064 | 2.5207 | 0.00586  |
| ENSG00000156466 | GDF6     | 8  | 97154562 | 97173020 | 33   | 10 | 466064 | 4.0661 | 2.39E-05 |
| ENSG00000156603 | MED19    | 11 | 57471186 | 57479693 | 5    | 3  | 466064 | 1.7658 | 0.03871  |
| ENSG00000156875 | HIAT1    | 1  | 1.01E+08 | 1.01E+08 | 83   | 13 | 466064 | 1.8643 | 0.03114  |
| ENSG00000156973 | PDE6D    | 2  | 2.33E+08 | 2.33E+08 | 155  | 19 | 466064 | 2.5888 | 0.00482  |
| ENSG00000157014 | TATDN2   | 3  | 10289707 | 10322902 | 93   | 14 | 466064 | 1.6715 | 0.04731  |
| ENSG00000157450 | RNF111   | 15 | 59157374 | 59389618 | 727  | 65 | 466064 | 1.6618 | 0.04828  |
| ENSG00000157593 | SLC35B2  | 6  | 44221833 | 44225291 | 5    | 2  | 466064 | 2.4092 | 0.00799  |
| ENSG00000157823 | AP3S2    | 15 | 90373831 | 90437574 | 204  | 17 | 466064 | 2.6304 | 0.00426  |
| ENSG00000157851 | DPYSL5   | 2  | 27070615 | 27173219 | 163  | 23 | 466064 | 2.1245 | 0.01682  |
| ENSG00000157978 | LDLRAP1  | 1  | 25870071 | 25895377 | 45   | 6  | 466064 | 1.7093 | 0.0437   |
| ENSG00000158246 | FAM46B   | 1  | 27331511 | 27339327 | 19   | 5  | 466064 | 2.024  | 0.02149  |
| ENSG00000158402 | CDC25C   | 5  | 1.38E+08 | 1.38E+08 | 132  | 14 | 466064 | 2.135  | 0.01638  |
| ENSG00000158417 | EIF5B    | 2  | 99953816 | 1E+08    | 115  | 11 | 466064 | 1.8768 | 0.03027  |
| ENSG00000158816 | VWA5B1   | 1  | 20617412 | 20681387 | 230  | 20 | 466064 | 1.7936 | 0.03644  |
| ENSG00000158955 | WNT9B    | 17 | 44910567 | 44964096 | 177  | 29 | 466064 | 2.5935 | 0.00475  |
| ENSG00000159110 | IFNAR2   | 21 | 34602206 | 34637980 | 99   | 17 | 466064 | 2.0537 | 0.02     |
| ENSG00000159239 | C2orf81  | 2  | 74641304 | 74648718 | 4    | 1  | 466064 | 2.1943 | 0.01411  |
| ENSG00000159459 | UBR1     | 15 | 43235095 | 43398311 | 281  | 13 | 466064 | 1.975  | 0.02414  |
| ENSG00000159479 | MED8     | 1  | 43849588 | 43855479 | 15   | 3  | 466064 | 1.9292 | 0.02685  |
| ENSG00000159579 | RSPRY1   | 16 | 57220049 | 57274387 | 118  | 16 | 466064 | 1.7068 | 0.04393  |
| ENSG00000159899 | NPR2     | 9  | 35792151 | 35809729 | 29   | 4  | 466064 | 1.8501 | 0.03215  |
| ENSG00000160058 | BSDC1    | 1  | 32830704 | 32860332 | 47   | 10 | 466064 | 1.8952 | 0.02904  |
| ENSG00000160097 | FINDC5   | 1  | 33327869 | 33338083 | 37   | 8  | 466064 | 1.8811 | 0.02998  |
| ENSG00000160224 | AIRE     | 21 | 45705721 | 45718531 | 23   | 6  | 466064 | 1.6785 | 0.04663  |
| ENSG00000160256 | FAM207A  | 21 | 46359925 | 46396904 | 143  | 21 | 466064 | 2.0955 | 0.01806  |
| ENSG00000160401 | C9orf117 | 9  | 1.3E+08  | 1.3E+08  | 19   | 6  | 466064 | 2.6553 | 0.00396  |
| ENSG00000160404 | TOR2A    | 9  | 1.3E+08  | 1.3E+08  | 6    | 3  | 466064 | 2.1982 | 0.01397  |
| ENSG00000160460 | SPTBN4   | 19 | 40972148 | 41082370 | 418  | 31 | 466064 | 2.3647 | 0.00902  |
| ENSG00000160691 | SHC1     | 1  | 1.55E+08 | 1.55E+08 | 35   | 6  | 466064 | 3.0175 | 0.00127  |
| ENSG00000160712 | IL6R     | 1  | 1.54E+08 | 1.54E+08 | 170  | 25 | 466064 | 1.8684 | 0.03086  |
| ENSG00000161202 | DVL3     | 3  | 1.84E+08 | 1.84E+08 | 61   | 8  | 466064 | 2.2908 | 0.01099  |
| ENSG00000161203 | AP2M1    | 3  | 1.84E+08 | 1.84E+08 | 34   | 8  | 466064 | 1.8297 | 0.03365  |
| ENSG00000161204 | ABCF3    | 3  | 1.84E+08 | 1.84E+08 | 34   | 8  | 466064 | 1.9199 | 0.02744  |
| ENSG00000161277 | THAP8    | 19 | 36525887 | 36545664 | 69   | 10 | 466064 | 1.649  | 0.04958  |
| ENSG00000161328 | LRRC56   | 11 | 537527   | 554916   | 110  | 18 | 466064 | 1.8541 | 0.03186  |
| ENSG00000161509 | GRIN2C   | 17 | 72838162 | 72857627 | 73   | 7  | 466064 | 1.9259 | 0.02706  |
| ENSG00000161533 | ACOX1    | 17 | 73937588 | 73975515 | 97   | 20 | 466064 | 2.1553 | 0.01557  |
| ENSG00000161835 | GRASP    | 12 | 52400724 | 52409673 | 33   | 7  | 466064 | 2.0871 | 0.01844  |
| ENSG00000162078 | ZG16B    | 16 | 2880170  | 2888967  | 34   | 8  | 466064 | 2.8801 | 0.00199  |
| ENSG00000162144 | CYB561A3 | 11 | 61116217 | 61129771 | 26   | 6  | 466064 | 1.6991 | 0.04465  |
| ENSG00000162460 | TMEM82   | 1  | 16068917 | 16074477 | 13   | 4  | 466064 | 2.4952 | 0.00629  |
| ENSG00000162461 | SLC25A34 | 1  | 16062900 | 16067891 | 24   | 3  | 466064 | 1.7319 | 0.04165  |
| ENSG00000162496 | DHRS3    | 1  | 12627939 | 12677737 | 137  | 13 | 466064 | 1.7519 | 0.0399   |
| ENSG00000162526 | TSSK3    | 1  | 32817122 | 32829913 | 17   | 5  | 466064 | 1.6757 | 0.0469   |
| ENSG00000162607 | USP1     | 1  | 62901968 | 62917475 | 20   | 5  | 466064 | 1.7347 | 0.04139  |
| ENSG00000162618 | ELTD1    | 1  | 79355449 | 79472403 | 404  | 16 | 466064 | 2.3659 | 0.00899  |
| ENSG00000162851 | TFB2M    | 1  | 2.47E+08 | 2.47E+08 | 129  | 13 | 466064 | 2.1892 | 0.01429  |
| ENSG00000163064 | EN1      | 2  | 1.2E+08  | 1.2E+08  | 7    | 2  | 466064 | 2.3712 | 0.00887  |
| ENSG00000163126 | ANKRD23  | 2  | 97490263 | 97523671 | 6    | 2  | 466064 | 2.451  | 0.00712  |
| ENSG00000163145 | C1QTNF7  | 4  | 15341442 | 15447790 | 296  | 18 | 466064 | 2.2843 | 0.01118  |
| ENSG00000163281 | GNPDA2   | 4  | 44684217 | 44728612 | 112  | 9  | 466064 | 1.9449 | 0.02589  |
| ENSG00000163285 | GABRG1   | 4  | 46037786 | 46126098 | 280  | 16 | 466064 | 2.519  | 0.00588  |
| ENSG00000163344 | PMVK     | 1  | 1.55E+08 | 1.55E+08 | 20   | 3  | 466064 | 3.0457 | 0.00116  |
| ENSG00000163346 | PBXIP1   | 1  | 1.55E+08 | 1.55E+08 | 17   | 5  | 466064 | 3.0217 | 0.00126  |
| ENSG00000163586 | FABP1    | 2  | 88422510 | 88427635 | 20   | 4  | 466064 | 1.8089 | 0.03523  |
| ENSG00000163605 | PPP4R2   | 3  | 73045936 | 73118350 | 191  | 20 | 466064 | 1.6951 | 0.04503  |
| ENSG00000163754 | GYG1     | 3  | 1.49E+08 | 1.49E+08 | 100  | 16 | 466064 | 2.6486 | 0.00404  |
| ENSG00000163811 | WDR43    | 2  | 29117509 | 29171088 | 140  | 18 | 466064 | 2.7635 | 0.00286  |
| ENSG00000163817 | SLC6A20  | 3  | 45796942 | 45838027 | 68   | 15 | 466064 | 2.1702 | 0.01499  |
| ENSG00000163818 | LZTFL1   | 3  | 45864808 | 45957534 | 235  | 25 | 466064 | 1.7335 | 0.0415   |
| ENSG00000163820 | FYCO1    | 3  | 45959396 | 46037316 | 244  | 18 | 466064 | 2.5609 | 0.00522  |
| ENSG00000163823 | CCR1     | 3  | 46243200 | 46249887 | 15   | 6  | 466064 | 2.5128 | 0.00599  |
| ENSG00000163872 | YEATS2   | 3  | 1.83E+08 | 1.84E+08 | 409  | 33 | 466064 | 1.8979 | 0.02886  |
| ENSG00000163918 | RFC4     | 3  | 1.87E+08 | 1.87E+08 | 42   | 13 | 466064 | 2.3302 | 0.0099   |
| ENSG00000163933 | RFT1     | 3  | 53122499 | 53164478 | 89   | 10 | 466064 | 1.7728 | 0.03813  |
| ENSG00000163961 | RNF168   | 3  | 1.96E+08 | 1.96E+08 | 170  | 24 | 466064 | 1.8133 | 0.03489  |
| ENSG00000164035 | EMCN     | 4  | 1.01E+08 | 1.02E+08 | 1410 | 66 | 466064 | 2.294  | 0.0109   |
| ENSG00000164091 | WDR82    | 3  | 52288437 | 52322036 | 51   | 7  | 466064 | 1.8273 | 0.03383  |
| ENSG00000164134 | NAA15    | 4  | 1.4E+08  | 1.4E+08  | 267  | 29 | 466064 | 1.9277 | 0.02694  |
| ENSG00000164164 | OTUD4    | 4  | 1.46E+08 | 1.46E+08 | 213  | 32 | 466064 | 1.6978 | 0.04477  |
| ENSG00000164176 | EDIL3    | 5  | 83236373 | 83680611 | 1035 | 80 | 466064 | 1.9792 | 0.0239   |
| ENSG00000164241 | C5orf63  | 5  | 1.26E+08 | 1.26E+08 | 64   | 12 | 466064 | 1.929  | 0.02686  |

|                 |          |    |          |          |      |     |        |        |         |
|-----------------|----------|----|----------|----------|------|-----|--------|--------|---------|
| ENSG00000164253 | WDR41    | 5  | 76721795 | 76916436 | 475  | 36  | 466064 | 2.1801 | 0.01463 |
| ENSG00000164366 | CCDC127  | 5  | 196986   | 218330   | 95   | 12  | 466064 | 2.0734 | 0.01907 |
| ENSG00000164708 | PGAM2    | 7  | 44102326 | 44105186 | 8    | 3   | 466064 | 1.9834 | 0.02366 |
| ENSG00000164776 | PHKG1    | 7  | 56148440 | 56160689 | 41   | 8   | 466064 | 1.6613 | 0.04833 |
| ENSG00000165006 | UBAP1    | 9  | 34179003 | 34252521 | 148  | 14  | 466064 | 1.7055 | 0.04405 |
| ENSG00000165046 | LETM2    | 8  | 38243725 | 38267045 | 27   | 6   | 466064 | 1.827  | 0.03385 |
| ENSG00000165071 | TMEM71   | 8  | 1.34E+08 | 1.34E+08 | 272  | 17  | 466064 | 1.8953 | 0.02903 |
| ENSG00000165185 | KIAA1958 | 9  | 1.15E+08 | 1.15E+08 | 599  | 41  | 466064 | 1.9096 | 0.02809 |
| ENSG00000165390 | ANXA8    | 10 | 48255253 | 48279200 | 32   | 6   | 466064 | 1.8491 | 0.03222 |
| ENSG00000165521 | EML5     | 14 | 89078775 | 89259096 | 424  | 69  | 466064 | 1.9729 | 0.02425 |
| ENSG00000165533 | TTC8     | 14 | 89290497 | 89344335 | 173  | 20  | 466064 | 3.0118 | 0.0013  |
| ENSG00000165678 | GHITM    | 10 | 85899196 | 85913001 | 36   | 7   | 466064 | 1.8908 | 0.02933 |
| ENSG00000165730 | STOX1    | 10 | 70587298 | 70655188 | 228  | 21  | 466064 | 1.7589 | 0.03929 |
| ENSG00000165929 | TC2N     | 14 | 92246095 | 92333880 | 280  | 42  | 466064 | 2.936  | 0.00166 |
| ENSG00000166165 | CKB      | 14 | 1.04E+08 | 1.04E+08 | 13   | 5   | 466064 | 1.7883 | 0.03687 |
| ENSG00000166246 | C16orf71 | 16 | 4784273  | 4799397  | 45   | 8   | 466064 | 1.9735 | 0.02422 |
| ENSG00000166257 | SCN3B    | 11 | 1.23E+08 | 1.24E+08 | 88   | 17  | 466064 | 1.7191 | 0.0428  |
| ENSG00000166278 | C2       | 6  | 31865562 | 31913449 | 156  | 30  | 466064 | 2.7985 | 0.00257 |
| ENSG00000166391 | MOGAT2   | 11 | 75428864 | 75444003 | 38   | 10  | 466064 | 2.4997 | 0.00621 |
| ENSG00000167094 | TTC16    | 9  | 1.3E+08  | 1.3E+08  | 52   | 10  | 466064 | 2.7925 | 0.00261 |
| ENSG00000167103 | PIP5KL1  | 9  | 1.31E+08 | 1.31E+08 | 31   | 4   | 466064 | 1.7279 | 0.042   |
| ENSG00000167110 | GOLGA2   | 9  | 1.31E+08 | 1.31E+08 | 59   | 16  | 466064 | 1.8528 | 0.03196 |
| ENSG00000167210 | LOXHD1   | 18 | 44056935 | 44236996 | 417  | 27  | 466064 | 1.7015 | 0.04443 |
| ENSG00000167261 | DPEP2    | 16 | 68021297 | 68034489 | 11   | 3   | 466064 | 1.6858 | 0.04592 |
| ENSG00000167264 | DUS2     | 16 | 68021649 | 68113223 | 133  | 11  | 466064 | 1.7853 | 0.0371  |
| ENSG00000167363 | FN3K     | 17 | 80693451 | 80709073 | 77   | 10  | 466064 | 1.6686 | 0.0476  |
| ENSG00000167371 | PRRT2    | 16 | 29823177 | 29827201 | 3    | 1   | 466064 | 2.1262 | 0.01674 |
| ENSG00000167613 | LAIR1    | 19 | 54865362 | 54882165 | 146  | 12  | 466064 | 2.535  | 0.00562 |
| ENSG00000167637 | ZNF283   | 19 | 44331444 | 44353307 | 68   | 9   | 466064 | 1.9073 | 0.02824 |
| ENSG00000167644 | C19orf33 | 19 | 38794801 | 38795649 | 5    | 1   | 466064 | 2.1118 | 0.01735 |
| ENSG00000167645 | YIF1B    | 19 | 38795753 | 38807913 | 44   | 9   | 466064 | 1.8281 | 0.03377 |
| ENSG00000167711 | SERPINF2 | 17 | 1646130  | 1658562  | 28   | 4   | 466064 | 1.7233 | 0.04242 |
| ENSG00000167858 | TEKT1    | 17 | 6692452  | 6735080  | 152  | 35  | 466064 | 1.8035 | 0.03565 |
| ENSG00000168028 | RPSA     | 3  | 39448180 | 39454033 | 24   | 3   | 466064 | 1.8396 | 0.03292 |
| ENSG00000168140 | VASN     | 16 | 4421849  | 4433529  | 41   | 9   | 466064 | 2.085  | 0.01854 |
| ENSG00000168216 | LMBRD1   | 6  | 70385694 | 70507003 | 239  | 11  | 466064 | 1.807  | 0.03538 |
| ENSG00000168394 | TAP1     | 6  | 32812986 | 32821755 | 76   | 14  | 466064 | 1.8554 | 0.03177 |
| ENSG00000168421 | RHOH     | 4  | 40192673 | 40248587 | 173  | 29  | 466064 | 1.741  | 0.04084 |
| ENSG00000168477 | TNXB     | 6  | 32008931 | 32083111 | 124  | 29  | 466064 | 2.9959 | 0.00137 |
| ENSG00000168564 | CDKN2AIP | 4  | 1.84E+08 | 1.84E+08 | 16   | 3   | 466064 | 2.3742 | 0.00879 |
| ENSG00000168566 | SNRNP48  | 6  | 7590432  | 7612200  | 54   | 8   | 466064 | 2.2621 | 0.01185 |
| ENSG00000168575 | LC20A2   | 8  | 42273993 | 42397069 | 210  | 18  | 466064 | 1.7515 | 0.03993 |
| ENSG00000168615 | ADAM9    | 8  | 38854388 | 38962663 | 268  | 42  | 466064 | 2.4913 | 0.00636 |
| ENSG00000168754 | FAM178B  | 2  | 97541620 | 97684175 | 233  | 10  | 466064 | 2.0246 | 0.02146 |
| ENSG00000168785 | TSPAN5   | 4  | 99391518 | 99579780 | 662  | 52  | 466064 | 1.7549 | 0.03964 |
| ENSG00000168874 | ATOH8    | 2  | 85978467 | 86015189 | 92   | 10  | 466064 | 2.1972 | 0.014   |
| ENSG00000168903 | BTNL3    | 5  | 1.8E+08  | 1.8E+08  | 98   | 15  | 466064 | 2.0613 | 0.01964 |
| ENSG00000169230 | PRELID1  | 5  | 1.77E+08 | 1.77E+08 | 11   | 7   | 466064 | 2.2356 | 0.01269 |
| ENSG00000169429 | IL8      | 4  | 74606223 | 74609433 | 18   | 5   | 466064 | 2.607  | 0.00457 |
| ENSG00000169682 | SPNS1    | 16 | 28985542 | 28995869 | 17   | 5   | 466064 | 1.8496 | 0.03219 |
| ENSG00000170191 | NANP     | 20 | 25593571 | 25604811 | 26   | 5   | 466064 | 1.8448 | 0.03253 |
| ENSG00000170209 | ANKK1    | 11 | 1.13E+08 | 1.13E+08 | 26   | 8   | 466064 | 2.5366 | 0.0056  |
| ENSG00000170315 | UBB      | 17 | 16284112 | 16286059 | 4    | 1   | 466064 | 1.8024 | 0.03574 |
| ENSG00000170322 | NFRKB    | 11 | 1.3E+08  | 1.3E+08  | 123  | 27  | 466064 | 2.1644 | 0.01522 |
| ENSG00000170348 | TMED10   | 14 | 75598173 | 75643334 | 94   | 20  | 466064 | 1.9262 | 0.02704 |
| ENSG00000170684 | ZNF296   | 19 | 45574758 | 45579846 | 14   | 3   | 466064 | 1.6485 | 0.04962 |
| ENSG00000170803 | OR2AG1   | 11 | 6806248  | 6807245  | 3    | 2   | 466064 | 2.4065 | 0.00805 |
| ENSG00000170871 | KIAA0232 | 4  | 6783102  | 6885897  | 151  | 24  | 466064 | 2.054  | 0.01999 |
| ENSG00000170889 | RPS9     | 19 | 54704610 | 54752862 | 153  | 31  | 466064 | 1.6641 | 0.04805 |
| ENSG00000170956 | CEACAM3  | 19 | 42300369 | 42315591 | 10   | 2   | 466064 | 2.1872 | 0.01437 |
| ENSG00000171017 | LRRRC8E  | 19 | 7953390  | 7966901  | 22   | 6   | 466064 | 2.2446 | 0.0124  |
| ENSG00000171103 | TRMT61B  | 2  | 29072687 | 29093167 | 40   | 8   | 466064 | 2.6087 | 0.00454 |
| ENSG00000171119 | NRTN     | 19 | 5823813  | 5828335  | 10   | 5   | 466064 | 1.9857 | 0.02353 |
| ENSG00000171132 | PRKCE    | 2  | 45878484 | 46415129 | 2012 | 177 | 466064 | 2.4145 | 0.00788 |
| ENSG00000171303 | KCNK3    | 2  | 26915619 | 26956288 | 81   | 5   | 466064 | 2.7768 | 0.00274 |
| ENSG00000171345 | KRT19    | 17 | 39679869 | 39684560 | 9    | 2   | 466064 | 2.1426 | 0.01607 |
| ENSG00000171346 | KRT15    | 17 | 39669995 | 39678781 | 41   | 2   | 466064 | 2.1007 | 0.01783 |
| ENSG00000171368 | TPPP     | 5  | 660883   | 693510   | 140  | 20  | 466064 | 2.0359 | 0.02088 |
| ENSG00000171403 | KRT9     | 17 | 39722096 | 39728310 | 4    | 1   | 466064 | 2.7049 | 0.00342 |
| ENSG00000171475 | WIPF2    | 17 | 38375556 | 38440388 | 179  | 28  | 466064 | 1.9793 | 0.02389 |
| ENSG00000171481 | OR1L3    | 9  | 1.25E+08 | 1.25E+08 | 2    | 1   | 466064 | 1.6569 | 0.04877 |
| ENSG00000171763 | SPATA5L1 | 15 | 45694529 | 45713617 | 99   | 8   | 466064 | 1.8659 | 0.03103 |
| ENSG00000171843 | MLLT3    | 9  | 20341663 | 20622542 | 505  | 53  | 466064 | 2.1087 | 0.01749 |

|                 |              |    |          |          |      |     |        |        |          |
|-----------------|--------------|----|----------|----------|------|-----|--------|--------|----------|
| ENSG00000171940 | ZNF217       | 20 | 52183604 | 52226446 | 125  | 18  | 466064 | 3.7623 | 8.42E-05 |
| ENSG00000172081 | MOB3A        | 19 | 2071037  | 2096672  | 64   | 16  | 466064 | 2.1139 | 0.01726  |
| ENSG00000172175 | MALT1        | 18 | 56338618 | 56417371 | 164  | 22  | 466064 | 1.7225 | 0.04249  |
| ENSG00000172215 | CXCR6        | 3  | 45982425 | 45989845 | 19   | 4   | 466064 | 1.6574 | 0.04872  |
| ENSG00000172339 | ALG14        | 1  | 95439963 | 95538501 | 231  | 30  | 466064 | 1.7555 | 0.03959  |
| ENSG00000172379 | ARNT2        | 15 | 80696692 | 80890278 | 586  | 65  | 466064 | 1.9767 | 0.02404  |
| ENSG00000172404 | DNAJB7       | 22 | 41255553 | 41258130 | 9    | 4   | 466064 | 2.306  | 0.01055  |
| ENSG00000172478 | C2orf54      | 2  | 2.42E+08 | 2.42E+08 | 30   | 7   | 466064 | 2.682  | 0.00366  |
| ENSG00000172482 | AGXT         | 2  | 2.42E+08 | 2.42E+08 | 61   | 8   | 466064 | 2.0887 | 0.01837  |
| ENSG00000172530 | BANP         | 16 | 87982850 | 88110924 | 487  | 29  | 466064 | 2.0815 | 0.01869  |
| ENSG00000172673 | THEMIS       | 6  | 1.28E+08 | 1.28E+08 | 395  | 22  | 466064 | 2.5482 | 0.00541  |
| ENSG00000172775 | FAM192A      | 16 | 57186378 | 57220028 | 69   | 11  | 466064 | 2.1619 | 0.01531  |
| ENSG00000172824 | CES4A        | 16 | 67022492 | 67043661 | 25   | 6   | 466064 | 1.7608 | 0.03913  |
| ENSG00000172828 | CES3         | 16 | 66995140 | 67009051 | 16   | 5   | 466064 | 1.7328 | 0.04157  |
| ENSG00000172890 | NADSYN1      | 11 | 71164155 | 71235153 | 206  | 35  | 466064 | 1.8764 | 0.0303   |
| ENSG00000172893 | DHCR7        | 11 | 71139239 | 71163914 | 113  | 11  | 466064 | 2.0433 | 0.02051  |
| ENSG00000172936 | MYD88        | 3  | 38179969 | 38184513 | 5    | 3   | 466064 | 2.1428 | 0.01607  |
| ENSG00000172939 | OXR1         | 3  | 38206580 | 38296979 | 163  | 14  | 466064 | 2.007  | 0.02238  |
| ENSG00000172986 | GXYLT2       | 3  | 72937224 | 73047289 | 379  | 21  | 466064 | 1.9604 | 0.02498  |
| ENSG00000173064 | HECTD4       | 12 | 1.13E+08 | 1.13E+08 | 418  | 37  | 466064 | 2.2091 | 0.01358  |
| ENSG00000173166 | RAPH1        | 2  | 2.04E+08 | 2.04E+08 | 381  | 45  | 466064 | 2.3315 | 0.00986  |
| ENSG00000173261 | PLAC8L1      | 5  | 1.45E+08 | 1.45E+08 | 42   | 6   | 466064 | 3.1211 | 0.0009   |
| ENSG00000173267 | SNCG         | 10 | 88718375 | 88723017 | 15   | 3   | 466064 | 2.3487 | 0.00942  |
| ENSG00000173269 | MMRN2        | 10 | 88695297 | 88729238 | 132  | 10  | 466064 | 2.3144 | 0.01032  |
| ENSG00000173366 | TLR9         | 3  | 52255097 | 52265206 | 17   | 4   | 466064 | 1.8368 | 0.03312  |
| ENSG00000173404 | INSM1        | 20 | 20348765 | 20351590 | 6    | 1   | 466064 | 3.1457 | 0.00083  |
| ENSG00000173567 | GPR113       | 2  | 26531041 | 26569685 | 113  | 15  | 466064 | 1.822  | 0.03423  |
| ENSG00000173578 | XCR1         | 3  | 46058516 | 46069234 | 54   | 8   | 466064 | 2.0051 | 0.02247  |
| ENSG00000173673 | HES3         | 1  | 6304252  | 6305638  | 7    | 3   | 466064 | 2.8304 | 0.00232  |
| ENSG00000173801 | JUP          | 17 | 39775692 | 39943183 | 402  | 13  | 466064 | 1.9391 | 0.02625  |
| ENSG00000173848 | NET1         | 10 | 5454514  | 5500426  | 162  | 21  | 466064 | 1.7054 | 0.04406  |
| ENSG00000173862 | RP11-89N17.1 | 7  | 33765593 | 33768068 | 9    | 3   | 466064 | 2.5051 | 0.00612  |
| ENSG00000173915 | USMG5        | 10 | 1.05E+08 | 1.05E+08 | 35   | 3   | 466064 | 2.2078 | 0.01363  |
| ENSG00000173960 | UBXN2A       | 2  | 24150155 | 24227779 | 238  | 21  | 466064 | 2.1088 | 0.01748  |
| ENSG00000174405 | LIG4         | 13 | 1.09E+08 | 1.09E+08 | 29   | 7   | 466064 | 2.0478 | 0.02029  |
| ENSG00000174501 | ANKRD36C     | 2  | 96514587 | 96657541 | 161  | 23  | 466064 | 1.976  | 0.02408  |
| ENSG00000174695 | TMEM167A     | 5  | 82348665 | 82373682 | 40   | 8   | 466064 | 1.6822 | 0.04626  |
| ENSG00000174697 | LEP          | 7  | 1.28E+08 | 1.28E+08 | 22   | 9   | 466064 | 2.2031 | 0.01379  |
| ENSG00000174915 | PTDSS2       | 11 | 448268   | 491393   | 128  | 15  | 466064 | 1.7401 | 0.04093  |
| ENSG00000174945 | AMZ1         | 7  | 2719156  | 2815134  | 437  | 23  | 466064 | 2.1482 | 0.01585  |
| ENSG00000174990 | CA5A         | 16 | 87921625 | 87970135 | 252  | 29  | 466064 | 1.9007 | 0.02867  |
| ENSG00000175130 | MARCKSL1     | 1  | 32799433 | 32801980 | 6    | 3   | 466064 | 1.8227 | 0.03418  |
| ENSG00000175170 | FAM182B      | 20 | 25744102 | 25848861 | 71   | 15  | 466064 | 1.9671 | 0.02458  |
| ENSG00000175497 | DPP10        | 2  | 1.15E+08 | 1.17E+08 | 3929 | 92  | 466064 | 1.8061 | 0.03545  |
| ENSG00000175518 | UBQLNL       | 11 | 5535623  | 5537935  | 16   | 2   | 466064 | 2.2046 | 0.01374  |
| ENSG00000175806 | MSRA         | 8  | 9911778  | 10286401 | 1543 | 61  | 466064 | 2.0067 | 0.02239  |
| ENSG00000175894 | TSPEAR       | 21 | 45917775 | 46131495 | 856  | 80  | 466064 | 1.9614 | 0.02492  |
| ENSG00000175931 | UBE2O        | 17 | 74385532 | 74449288 | 176  | 22  | 466064 | 2.2247 | 0.01305  |
| ENSG00000176102 | CSTF3        | 11 | 33098734 | 33183917 | 216  | 15  | 466064 | 1.7205 | 0.04267  |
| ENSG00000176299 | OR4M1        | 14 | 20248401 | 20249516 | 5    | 2   | 466064 | 2.1997 | 0.01392  |
| ENSG00000176381 | PRR18        | 6  | 1.67E+08 | 1.67E+08 | 7    | 3   | 466064 | 1.7506 | 0.04001  |
| ENSG00000176435 | CLEC14A      | 14 | 38723308 | 38725574 | 2    | 1   | 466064 | 2.6003 | 0.00466  |
| ENSG00000176635 | HORMAD2      | 22 | 30476163 | 30573064 | 344  | 22  | 466064 | 1.7221 | 0.04253  |
| ENSG00000176769 | TCERG1L      | 10 | 1.33E+08 | 1.33E+08 | 863  | 85  | 466064 | 2.3063 | 0.01055  |
| ENSG00000176909 | MAMSTR       | 19 | 49215999 | 49222978 | 17   | 4   | 466064 | 1.7988 | 0.03602  |
| ENSG00000176912 | C18orf56     | 18 | 641320   | 658340   | 54   | 10  | 466064 | 1.8285 | 0.03374  |
| ENSG00000176920 | FUT2         | 19 | 49199228 | 49209207 | 24   | 8   | 466064 | 1.9904 | 0.02327  |
| ENSG00000176925 | OR51F2       | 11 | 4842551  | 4843686  | 4    | 2   | 466064 | 2.011  | 0.02216  |
| ENSG00000177047 | IFNW1        | 9  | 21140631 | 21142144 | 2    | 1   | 466064 | 2.7626 | 0.00287  |
| ENSG00000177192 | PUS1         | 12 | 1.32E+08 | 1.32E+08 | 115  | 19  | 466064 | 1.8579 | 0.03159  |
| ENSG00000177200 | CHD9         | 16 | 53088945 | 53363062 | 709  | 22  | 466064 | 2.5458 | 0.00545  |
| ENSG00000177294 | FBXO39       | 17 | 6679542  | 6700420  | 77   | 20  | 466064 | 1.7752 | 0.03794  |
| ENSG00000177455 | CD19         | 16 | 28943260 | 28950667 | 10   | 4   | 466064 | 1.6908 | 0.04543  |
| ENSG00000177614 | PGBD5        | 1  | 2.3E+08  | 2.31E+08 | 362  | 43  | 466064 | 2.0151 | 0.02195  |
| ENSG00000177694 | NAALADL2     | 3  | 1.74E+08 | 1.76E+08 | 4641 | 231 | 466064 | 2.1156 | 0.01719  |
| ENSG00000177706 | FAM20C       | 7  | 192969   | 300711   | 587  | 65  | 466064 | 2.5666 | 0.00513  |
| ENSG00000177707 | PVRL3        | 3  | 1.11E+08 | 1.11E+08 | 460  | 25  | 466064 | 2.9158 | 0.00177  |
| ENSG00000177710 | SLC35G5      | 8  | 11188397 | 11189717 | 3    | 1   | 466064 | 2.0616 | 0.01962  |
| ENSG00000177733 | HNRNPA0      | 5  | 1.37E+08 | 1.37E+08 | 20   | 4   | 466064 | 2.3113 | 0.01041  |
| ENSG00000177752 | YIPF7        | 4  | 44624086 | 44680573 | 228  | 16  | 466064 | 1.7368 | 0.04121  |
| ENSG00000177954 | RPS27        | 1  | 1.54E+08 | 1.54E+08 | 1    | 1   | 466064 | 2.1257 | 0.01676  |
| ENSG00000178233 | TMEM151B     | 6  | 44238203 | 44275243 | 107  | 24  | 466064 | 2.1163 | 0.01716  |
| ENSG00000178235 | SLITRK1      | 13 | 84451344 | 84456528 | 29   | 4   | 466064 | 2.2737 | 0.01149  |

|                 |               |    |          |          |      |     |        |        |         |
|-----------------|---------------|----|----------|----------|------|-----|--------|--------|---------|
| ENSG00000178381 | ZFAND2A       | 7  | 1191707  | 1200395  | 16   | 6   | 466064 | 1.7825 | 0.03734 |
| ENSG00000178773 | CPNE7         | 16 | 89642176 | 89663654 | 80   | 14  | 466064 | 1.7027 | 0.04431 |
| ENSG00000178913 | TAF7          | 5  | 1.41E+08 | 1.41E+08 | 1    | 1   | 466064 | 1.7477 | 0.04026 |
| ENSG00000178999 | AURKB         | 17 | 8108056  | 8113918  | 18   | 5   | 466064 | 1.7045 | 0.04415 |
| ENSG00000179044 | EXOC3L1       | 16 | 67218269 | 67224107 | 3    | 1   | 466064 | 1.6557 | 0.04889 |
| ENSG00000179178 | TMEM125       | 1  | 43735665 | 43739673 | 4    | 2   | 466064 | 1.9613 | 0.02492 |
| ENSG00000179344 | HLA-DQB1      | 6  | 32627244 | 32636160 | 396  | 18  | 466064 | 3.5589 | 0.00019 |
| ENSG00000179528 | LBX2          | 2  | 74724644 | 74730443 | 8    | 2   | 466064 | 3.139  | 0.00085 |
| ENSG00000179564 | LSMEM2        | 3  | 50316458 | 50325545 | 9    | 4   | 466064 | 1.7183 | 0.04287 |
| ENSG00000179580 | RNF151        | 16 | 2016824  | 2018976  | 7    | 2   | 466064 | 2.1452 | 0.01597 |
| ENSG00000179902 | C1orf194      | 1  | 1.1E+08  | 1.1E+08  | 28   | 4   | 466064 | 1.888  | 0.02952 |
| ENSG00000180044 | C3orf80       | 3  | 1.6E+08  | 1.6E+08  | 14   | 5   | 466064 | 1.9394 | 0.02622 |
| ENSG00000180354 | MTURN         | 7  | 30174426 | 30202378 | 68   | 11  | 466064 | 1.8135 | 0.03488 |
| ENSG00000180592 | SKIDA1        | 10 | 21802407 | 21814611 | 17   | 7   | 466064 | 1.6528 | 0.04918 |
| ENSG00000180611 | MB21D2        | 3  | 1.93E+08 | 1.93E+08 | 401  | 55  | 466064 | 2.2454 | 0.01237 |
| ENSG00000180979 | LRRC57        | 15 | 42834720 | 42841000 | 4    | 2   | 466064 | 1.8183 | 0.03451 |
| ENSG00000181350 | FAM211A       | 17 | 16344891 | 16395467 | 78   | 13  | 466064 | 2.8676 | 0.00207 |
| ENSG00000181690 | PLAG1         | 8  | 57073463 | 57123883 | 177  | 18  | 466064 | 1.9268 | 0.027   |
| ENSG00000181885 | CLDN7         | 17 | 7163222  | 7167302  | 2    | 1   | 466064 | 1.8306 | 0.03358 |
| ENSG00000182095 | TNRC18        | 7  | 5346421  | 5465045  | 420  | 65  | 466064 | 1.8772 | 0.03025 |
| ENSG00000182168 | UNC5C         | 4  | 96083655 | 96470357 | 822  | 30  | 466064 | 2.0002 | 0.02274 |
| ENSG00000182230 | FAM153B       | 5  | 1.75E+08 | 1.76E+08 | 226  | 21  | 466064 | 1.7151 | 0.04317 |
| ENSG00000182319 | SGK223        | 8  | 8175258  | 8244008  | 66   | 8   | 466064 | 2.6001 | 0.00466 |
| ENSG00000182552 | RWDD4         | 4  | 1.85E+08 | 1.85E+08 | 64   | 8   | 466064 | 1.8509 | 0.03209 |
| ENSG00000182568 | SATB1         | 3  | 18386879 | 18487080 | 221  | 38  | 466064 | 2.0038 | 0.02254 |
| ENSG00000182575 | NXPH3         | 17 | 47653220 | 47661189 | 10   | 3   | 466064 | 2.4061 | 0.00806 |
| ENSG00000182611 | HIST1H2AJ     | 6  | 27782112 | 27782607 | 2    | 1   | 466064 | 2.0876 | 0.01842 |
| ENSG00000182621 | PLCB1         | 20 | 8112824  | 8949003  | 2653 | 172 | 466064 | 1.8247 | 0.03403 |
| ENSG00000182768 | NGRN          | 15 | 90808891 | 90816463 | 42   | 11  | 466064 | 2.9556 | 0.00156 |
| ENSG00000182771 | GRID1         | 10 | 87359312 | 88126250 | 1683 | 112 | 466064 | 1.6816 | 0.04633 |
| ENSG00000182866 | LCK           | 1  | 32716840 | 32751766 | 72   | 9   | 466064 | 1.8391 | 0.03295 |
| ENSG00000182909 | LENG9         | 19 | 54972981 | 54974894 | 8    | 3   | 466064 | 1.8607 | 0.0314  |
| ENSG00000182938 | OTOP3         | 17 | 72931814 | 72946087 | 20   | 4   | 466064 | 1.818  | 0.03453 |
| ENSG00000183077 | AFMID         | 17 | 76183398 | 76203782 | 43   | 10  | 466064 | 1.9961 | 0.02296 |
| ENSG00000183090 | FREM3         | 4  | 1.44E+08 | 1.45E+08 | 234  | 21  | 466064 | 1.9761 | 0.02407 |
| ENSG00000183103 | LYPD4         | 19 | 42341148 | 42348760 | 10   | 2   | 466064 | 2.5592 | 0.00525 |
| ENSG00000183128 | CALHM3        | 10 | 1.05E+08 | 1.05E+08 | 11   | 4   | 466064 | 2.6511 | 0.00401 |
| ENSG00000183230 | CTNNA3        | 10 | 67672276 | 69455927 | 5277 | 152 | 466064 | 2.2036 | 0.01378 |
| ENSG00000183248 | CTD-3193O13.9 | 19 | 7933605  | 7939326  | 30   | 5   | 466064 | 2.5363 | 0.0056  |
| ENSG00000183255 | PTTG1IP       | 21 | 46269500 | 46293752 | 120  | 9   | 466064 | 1.9799 | 0.02386 |
| ENSG00000183549 | ACSM5         | 16 | 20420856 | 20452658 | 165  | 13  | 466064 | 2.0232 | 0.02153 |
| ENSG00000183617 | MRPL54        | 19 | 3762662  | 3768573  | 22   | 6   | 466064 | 1.6831 | 0.04617 |
| ENSG00000183625 | CCR3          | 3  | 46205096 | 46308197 | 321  | 17  | 466064 | 2.6909 | 0.00356 |
| ENSG00000183643 | C15orf32      | 15 | 93014884 | 93044347 | 137  | 37  | 466064 | 1.6552 | 0.04894 |
| ENSG00000183695 | MRGPRX2       | 11 | 19076002 | 19082228 | 21   | 4   | 466064 | 1.71   | 0.04363 |
| ENSG00000183751 | TBL3          | 16 | 2022038  | 2032934  | 30   | 6   | 466064 | 1.6528 | 0.04919 |
| ENSG00000183780 | SLC35F3       | 1  | 2.34E+08 | 2.34E+08 | 1442 | 123 | 466064 | 2.5579 | 0.00527 |
| ENSG00000183889 | NPIPA7        | 16 | 16411301 | 16444447 | 1    | 1   | 466064 | 1.8151 | 0.03475 |
| ENSG00000184156 | KCNQ3         | 8  | 1.33E+08 | 1.33E+08 | 1336 | 132 | 466064 | 1.7518 | 0.03991 |
| ENSG00000184345 | IQCF2         | 3  | 51895645 | 51897440 | 4    | 1   | 466064 | 2.2319 | 0.01281 |
| ENSG00000184348 | HIST1H2AK     | 6  | 27805658 | 27806117 | 4    | 2   | 466064 | 2.1238 | 0.01684 |
| ENSG00000184575 | XPOT          | 12 | 64798130 | 64844907 | 64   | 13  | 466064 | 1.7097 | 0.04366 |
| ENSG00000184613 | NELL2         | 12 | 44902058 | 45315631 | 859  | 39  | 466064 | 2.2859 | 0.01113 |
| ENSG00000184647 | PRSS55        | 8  | 10383056 | 10411676 | 123  | 15  | 466064 | 2.2885 | 0.01106 |
| ENSG00000184661 | CDCA2         | 8  | 25316513 | 25365436 | 108  | 15  | 466064 | 1.6927 | 0.04525 |
| ENSG00000184786 | TCTE3         | 6  | 1.7E+08  | 1.7E+08  | 66   | 8   | 466064 | 1.8936 | 0.02914 |
| ENSG00000184787 | UBE2G2        | 21 | 46188955 | 46221934 | 102  | 16  | 466064 | 2.1037 | 0.0177  |
| ENSG00000184814 | PRR23B        | 3  | 1.39E+08 | 1.39E+08 | 3    | 1   | 466064 | 1.8113 | 0.03505 |
| ENSG00000184863 | RBM33         | 7  | 1.55E+08 | 1.56E+08 | 516  | 87  | 466064 | 1.6822 | 0.04627 |
| ENSG00000184903 | IMMP2L        | 7  | 1.1E+08  | 1.11E+08 | 2163 | 99  | 466064 | 1.812  | 0.03499 |
| ENSG00000184939 | ZFP90         | 16 | 68563993 | 68609975 | 96   | 11  | 466064 | 1.9268 | 0.027   |
| ENSG00000185056 | C5orf47       | 5  | 1.73E+08 | 1.73E+08 | 109  | 15  | 466064 | 1.6608 | 0.04838 |
| ENSG00000185085 | INTS5         | 11 | 62414320 | 62420774 | 23   | 7   | 466064 | 1.6846 | 0.04603 |
| ENSG00000185100 | ADSSL1        | 14 | 1.05E+08 | 1.05E+08 | 53   | 7   | 466064 | 1.678  | 0.04667 |
| ENSG00000185215 | TNFAIP2       | 14 | 1.04E+08 | 1.04E+08 | 41   | 8   | 466064 | 1.7552 | 0.03961 |
| ENSG00000185420 | SMYD3         | 1  | 2.46E+08 | 2.47E+08 | 3255 | 97  | 466064 | 2.2503 | 0.01222 |
| ENSG00000185453 | C19orf68      | 19 | 48673949 | 48700877 | 65   | 9   | 466064 | 1.9359 | 0.02644 |
| ENSG00000185627 | PSMD13        | 11 | 236546   | 252983   | 100  | 14  | 466064 | 1.7154 | 0.04314 |
| ENSG00000185823 | NPAP1         | 15 | 24920541 | 24928593 | 37   | 15  | 466064 | 1.8494 | 0.0322  |
| ENSG00000185885 | IFITM1        | 11 | 313506   | 315272   | 2    | 1   | 466064 | 1.8549 | 0.0318  |
| ENSG00000185928 | PAGR1         | 16 | 29827285 | 29841948 | 18   | 2   | 466064 | 1.9737 | 0.02421 |
| ENSG00000185933 | CALHM1        | 10 | 1.05E+08 | 1.05E+08 | 7    | 3   | 466064 | 2.259  | 0.01194 |
| ENSG00000186073 | C15orf41      | 15 | 36871812 | 37102449 | 470  | 78  | 466064 | 1.7473 | 0.0403  |

|                 |              |    |          |          |      |    |        |        |          |
|-----------------|--------------|----|----------|----------|------|----|--------|--------|----------|
| ENSG00000186150 | UBL4B        | 1  | 1.11E+08 | 1.11E+08 | 3    | 1  | 466064 | 1.7891 | 0.0368   |
| ENSG00000186212 | SOWAHB       | 4  | 77816082 | 77819002 | 6    | 2  | 466064 | 1.6944 | 0.04509  |
| ENSG00000186260 | MKL2         | 16 | 14165178 | 14360630 | 466  | 38 | 466064 | 2.4868 | 0.00644  |
| ENSG00000186407 | CD300E       | 17 | 72606026 | 72619897 | 43   | 11 | 466064 | 2.9731 | 0.00147  |
| ENSG00000186431 | FCAR         | 19 | 55385704 | 55401838 | 95   | 18 | 466064 | 2.6246 | 0.00434  |
| ENSG00000186479 | RGS7BP       | 5  | 63802084 | 63908139 | 165  | 22 | 466064 | 2.813  | 0.00245  |
| ENSG00000186517 | ARHGAP30     | 1  | 1.61E+08 | 1.61E+08 | 60   | 14 | 466064 | 1.6637 | 0.04809  |
| ENSG00000186638 | KIF24        | 9  | 34252379 | 34329198 | 156  | 15 | 466064 | 1.8854 | 0.02969  |
| ENSG00000186654 | PRR5         | 22 | 45064593 | 45133561 | 223  | 34 | 466064 | 2.1447 | 0.01599  |
| ENSG00000186803 | IFNA10       | 9  | 21206180 | 21207142 | 8    | 2  | 466064 | 1.7561 | 0.03953  |
| ENSG00000187024 | PTRH1        | 9  | 1.3E+08  | 1.3E+08  | 82   | 16 | 466064 | 2.2707 | 0.01158  |
| ENSG00000187049 | TMEM216      | 11 | 61159159 | 61166335 | 10   | 3  | 466064 | 1.7153 | 0.04315  |
| ENSG00000187091 | PLCD1        | 3  | 38048987 | 38071253 | 60   | 6  | 466064 | 2.0501 | 0.02018  |
| ENSG00000187510 | PLEKHG7      | 12 | 93115281 | 93166231 | 101  | 20 | 466064 | 1.7468 | 0.04034  |
| ENSG00000187600 | TMEM247      | 2  | 46656329 | 46711564 | 226  | 26 | 466064 | 1.9606 | 0.02496  |
| ENSG00000187730 | GABRD        | 1  | 1950780  | 1962192  | 42   | 8  | 466064 | 2.3868 | 0.0085   |
| ENSG00000187766 | KRTAP10-8    | 21 | 46031996 | 46032871 | 1    | 1  | 466064 | 1.883  | 0.02985  |
| ENSG00000187801 | ZFP69B       | 1  | 40915774 | 40929390 | 71   | 12 | 466064 | 1.668  | 0.04766  |
| ENSG00000187871 | GFRAL        | 6  | 55192267 | 55267291 | 242  | 18 | 466064 | 1.8501 | 0.03215  |
| ENSG00000188076 | SCGB1C1      | 11 | 193080   | 194573   | 2    | 1  | 466064 | 1.7182 | 0.04288  |
| ENSG00000188242 | CTD-2228K2.5 | 5  | 466239   | 473213   | 26   | 6  | 466064 | 2.0001 | 0.02274  |
| ENSG00000188676 | IDO2         | 8  | 39792133 | 39873910 | 201  | 18 | 466064 | 2.225  | 0.01304  |
| ENSG00000188687 | SLC4A5       | 2  | 74443369 | 74570541 | 110  | 14 | 466064 | 2.1754 | 0.0148   |
| ENSG00000188906 | LRRK2        | 12 | 40590546 | 40763087 | 516  | 41 | 466064 | 2.3705 | 0.00888  |
| ENSG00000188909 | BSX          | 11 | 1.23E+08 | 1.23E+08 | 6    | 3  | 466064 | 2.1166 | 0.01715  |
| ENSG00000188993 | LRRRC66      | 4  | 52859868 | 52883786 | 74   | 10 | 466064 | 2.6071 | 0.00457  |
| ENSG00000189253 | TRIM64B      | 11 | 89602450 | 89609185 | 17   | 2  | 466064 | 1.942  | 0.02607  |
| ENSG00000189350 | FAM179A      | 2  | 29179477 | 29284239 | 351  | 42 | 466064 | 1.6521 | 0.04925  |
| ENSG00000189366 | ALG1L        | 3  | 1.26E+08 | 1.26E+08 | 26   | 5  | 466064 | 1.7698 | 0.03838  |
| ENSG00000189433 | GJB4         | 1  | 35225342 | 35229325 | 5    | 2  | 466064 | 2.3706 | 0.00888  |
| ENSG00000196126 | HLA-DRB1     | 6  | 32546546 | 32557625 | 18   | 6  | 466064 | 2.3566 | 0.00922  |
| ENSG00000196341 | OR8D1        | 11 | 1.24E+08 | 1.24E+08 | 3    | 1  | 466064 | 1.9768 | 0.02403  |
| ENSG00000196374 | HIST1H2BM    | 6  | 27782822 | 27783267 | 1    | 1  | 466064 | 2.0887 | 0.01837  |
| ENSG00000196549 | MME          | 3  | 1.55E+08 | 1.55E+08 | 415  | 23 | 466064 | 1.6559 | 0.04888  |
| ENSG00000196622 | RIMBP3       | 22 | 20456003 | 20461786 | 9    | 3  | 466064 | 3.2454 | 0.00059  |
| ENSG00000196693 | ZNF33B       | 10 | 43084555 | 43133992 | 167  | 22 | 466064 | 2.5844 | 0.00488  |
| ENSG00000196735 | HLA-DQA1     | 6  | 32595956 | 32614839 | 813  | 15 | 466064 | 3.8772 | 5.28E-05 |
| ENSG00000196843 | ARID5A       | 2  | 97202480 | 97218375 | 31   | 5  | 466064 | 2.2382 | 0.0126   |
| ENSG00000196866 | HIST1H2AD    | 6  | 26199079 | 26199471 | 3    | 1  | 466064 | 2.2951 | 0.01086  |
| ENSG00000197125 | OR8B8        | 11 | 1.24E+08 | 1.24E+08 | 4    | 2  | 466064 | 2.0033 | 0.02257  |
| ENSG00000197157 | SND1         | 7  | 1.27E+08 | 1.28E+08 | 1099 | 41 | 466064 | 2.862  | 0.0021   |
| ENSG00000197283 | SYNGAP1      | 6  | 33387847 | 33421466 | 78   | 16 | 466064 | 2.2133 | 0.01344  |
| ENSG00000197381 | ADARB1       | 21 | 46493768 | 46646478 | 687  | 40 | 466064 | 2.5801 | 0.00494  |
| ENSG00000197472 | ZNF695       | 1  | 2.47E+08 | 2.47E+08 | 215  | 22 | 466064 | 2.3275 | 0.00997  |
| ENSG00000197555 | SIPA1L1      | 14 | 71787166 | 72207946 | 1527 | 85 | 466064 | 2.06   | 0.0197   |
| ENSG00000197601 | FAR1         | 11 | 13690217 | 13753893 | 143  | 28 | 466064 | 1.7144 | 0.04323  |
| ENSG00000197608 | ZNF841       | 19 | 52567719 | 52599018 | 217  | 27 | 466064 | 2.0875 | 0.01842  |
| ENSG00000197714 | ZNF460       | 19 | 57791419 | 57804937 | 43   | 9  | 466064 | 1.7615 | 0.03908  |
| ENSG00000197748 | WDR96        | 10 | 1.06E+08 | 1.06E+08 | 316  | 20 | 466064 | 2.5976 | 0.00469  |
| ENSG00000197846 | HIST1H2BF    | 6  | 26199748 | 26200942 | 7    | 3  | 466064 | 1.6719 | 0.04727  |
| ENSG00000197914 | HIST1H4K     | 6  | 27798952 | 27799305 | 1    | 1  | 466064 | 2.9936 | 0.00138  |
| ENSG00000197919 | IFNA1        | 9  | 21440440 | 21441315 | 2    | 1  | 466064 | 1.8367 | 0.03312  |
| ENSG00000197935 | ZNF311       | 6  | 28962562 | 28973093 | 23   | 6  | 466064 | 2.2762 | 0.01142  |
| ENSG00000198033 | TUBA3C       | 13 | 19747910 | 19755992 | 20   | 5  | 466064 | 2.0893 | 0.01834  |
| ENSG00000198035 | AGAP9        | 10 | 48189612 | 48237508 | 97   | 9  | 466064 | 1.6966 | 0.04489  |
| ENSG00000198053 | SIRPA        | 20 | 1875154  | 1920543  | 208  | 25 | 466064 | 2.4265 | 0.00762  |
| ENSG00000198185 | ZNF334       | 20 | 45129701 | 45142198 | 25   | 4  | 466064 | 1.8517 | 0.03204  |
| ENSG00000198203 | SULT1C2      | 2  | 1.09E+08 | 1.09E+08 | 53   | 8  | 466064 | 1.6953 | 0.04501  |
| ENSG00000198211 | TUBB3        | 16 | 89985573 | 90002500 | 79   | 15 | 466064 | 2.6943 | 0.00353  |
| ENSG00000198225 | FKBP1C       | 6  | 63921351 | 63922929 | 4    | 2  | 466064 | 2.0412 | 0.02062  |
| ENSG00000198246 | SLC29A3      | 10 | 73079015 | 73123142 | 83   | 3  | 466064 | 1.7423 | 0.04073  |
| ENSG00000198276 | UCKL1        | 20 | 62571186 | 62587769 | 122  | 9  | 466064 | 2.1767 | 0.01475  |
| ENSG00000198502 | HLA-DRB5     | 6  | 32485120 | 32498064 | 16   | 5  | 466064 | 2.9654 | 0.00151  |
| ENSG00000198518 | HIST1H4E     | 6  | 26204858 | 26206266 | 13   | 4  | 466064 | 1.9313 | 0.02672  |
| ENSG00000198563 | DDX39B       | 6  | 31497996 | 31510225 | 139  | 17 | 466064 | 3.1062 | 0.00095  |
| ENSG00000198657 | OR8B4        | 11 | 1.24E+08 | 1.24E+08 | 1    | 1  | 466064 | 2.3009 | 0.0107   |
| ENSG00000198704 | GPX6         | 6  | 28471073 | 28495992 | 46   | 12 | 466064 | 2.7372 | 0.0031   |
| ENSG00000198739 | LRRTM3       | 10 | 68685764 | 68859588 | 423  | 21 | 466064 | 2.94   | 0.00164  |
| ENSG00000198740 | ZNF652       | 17 | 47366568 | 47439835 | 216  | 15 | 466064 | 1.6906 | 0.04546  |
| ENSG00000198799 | LRIG2        | 1  | 1.14E+08 | 1.14E+08 | 109  | 14 | 466064 | 1.9485 | 0.02568  |
| ENSG00000198805 | PNP          | 14 | 20937113 | 20945253 | 10   | 6  | 466064 | 2.0496 | 0.0202   |
| ENSG00000198821 | CD247        | 1  | 1.67E+08 | 1.67E+08 | 281  | 39 | 466064 | 2.0172 | 0.02184  |
| ENSG00000198830 | HMG2         | 1  | 26798941 | 26802463 | 1    | 1  | 466064 | 2.5459 | 0.00545  |

|                 |           |    |          |          |     |    |        |        |          |
|-----------------|-----------|----|----------|----------|-----|----|--------|--------|----------|
| ENSG00000198865 | CCDC152   | 5  | 42756903 | 42802462 | 119 | 12 | 466064 | 2.5231 | 0.00582  |
| ENSG00000198885 | ITPRIPL1  | 2  | 96991069 | 96994091 | 4   | 1  | 466064 | 2.1212 | 0.01695  |
| ENSG00000198890 | PRMT6     | 1  | 1.08E+08 | 1.08E+08 | 8   | 3  | 466064 | 1.6914 | 0.04538  |
| ENSG00000198954 | KIAA1279  | 10 | 70748487 | 70776738 | 159 | 24 | 466064 | 1.8466 | 0.0324   |
| ENSG00000203710 | CR1       | 1  | 2.08E+08 | 2.08E+08 | 422 | 28 | 466064 | 1.9019 | 0.02859  |
| ENSG00000203722 | RAET1G    | 6  | 1.5E+08  | 1.5E+08  | 36  | 7  | 466064 | 1.9878 | 0.02341  |
| ENSG00000203734 | ECT2L     | 6  | 1.39E+08 | 1.39E+08 | 329 | 19 | 466064 | 1.8489 | 0.03224  |
| ENSG00000203832 | NBPF20    | 1  | 1.48E+08 | 1.48E+08 | 180 | 22 | 466064 | 1.87   | 0.03075  |
| ENSG00000203907 | OOEP      | 6  | 74078278 | 74104856 | 139 | 9  | 466064 | 1.6943 | 0.04511  |
| ENSG00000204179 | PTPN20A   | 10 | 46549955 | 46641045 | 27  | 10 | 466064 | 2.6202 | 0.00439  |
| ENSG00000204209 | DAXX      | 6  | 33286335 | 33297046 | 17  | 6  | 466064 | 3.5916 | 0.00016  |
| ENSG00000204217 | BMPR2     | 2  | 2.03E+08 | 2.03E+08 | 310 | 25 | 466064 | 1.841  | 0.03281  |
| ENSG00000204220 | PFDN6     | 6  | 33257079 | 33266178 | 19  | 5  | 466064 | 2.143  | 0.01606  |
| ENSG00000204227 | RING1     | 6  | 33176272 | 33180499 | 7   | 3  | 466064 | 1.8088 | 0.03524  |
| ENSG00000204228 | HSD17B8   | 6  | 33172419 | 33174608 | 9   | 2  | 466064 | 1.9939 | 0.02308  |
| ENSG00000204248 | COL11A2   | 6  | 33130458 | 33160276 | 378 | 18 | 466064 | 2.083  | 0.01862  |
| ENSG00000204252 | HLA-DOA   | 6  | 32971955 | 32977389 | 23  | 11 | 466064 | 2.8527 | 0.00217  |
| ENSG00000204283 | FLJ45079  | 17 | 75875109 | 75878659 | 14  | 3  | 466064 | 1.9342 | 0.02655  |
| ENSG00000204287 | HLA-DRA   | 6  | 32407619 | 32412823 | 55  | 7  | 466064 | 2.51   | 0.00604  |
| ENSG00000204290 | BTNL2     | 6  | 32361740 | 32374905 | 127 | 18 | 466064 | 4.6892 | 1.37E-06 |
| ENSG00000204296 | C6orf10   | 6  | 32256303 | 32339684 | 635 | 19 | 466064 | 2.8536 | 0.00216  |
| ENSG00000204314 | PRRT1     | 6  | 32116136 | 32122150 | 13  | 6  | 466064 | 2.4746 | 0.00667  |
| ENSG00000204344 | STK19     | 6  | 31938868 | 31950598 | 30  | 8  | 466064 | 2.3118 | 0.0104   |
| ENSG00000204348 | DXO       | 6  | 31937587 | 31940069 | 7   | 2  | 466064 | 2.1819 | 0.01456  |
| ENSG00000204351 | SKIV2L    | 6  | 31926857 | 31937532 | 32  | 10 | 466064 | 2.1723 | 0.01492  |
| ENSG00000204366 | ZBTB12    | 6  | 31867384 | 31869769 | 12  | 4  | 466064 | 2.9578 | 0.00155  |
| ENSG00000204371 | EHMT2     | 6  | 31847536 | 31865464 | 45  | 15 | 466064 | 2.9221 | 0.00174  |
| ENSG00000204385 | SLC44A4   | 6  | 31830969 | 31846823 | 50  | 17 | 466064 | 2.7236 | 0.00323  |
| ENSG00000204387 | C6orf48   | 6  | 31802385 | 31807541 | 11  | 6  | 466064 | 2.03   | 0.02118  |
| ENSG00000204388 | HSPA1B    | 6  | 31795512 | 31798031 | 6   | 3  | 466064 | 1.6711 | 0.04735  |
| ENSG00000204389 | HSPA1A    | 6  | 31783291 | 31785723 | 4   | 2  | 466064 | 2.3205 | 0.01016  |
| ENSG00000204390 | HSPA1L    | 6  | 31777396 | 31783437 | 11  | 5  | 466064 | 2.8861 | 0.00195  |
| ENSG00000204392 | LSM2      | 6  | 31765173 | 31774761 | 20  | 8  | 466064 | 2.874  | 0.00203  |
| ENSG00000204394 | VARS      | 6  | 31745295 | 31763730 | 36  | 10 | 466064 | 2.312  | 0.01039  |
| ENSG00000204396 | VWA7      | 6  | 31733367 | 31745108 | 28  | 11 | 466064 | 2.6597 | 0.00391  |
| ENSG00000204410 | MSH5      | 6  | 31707725 | 31732622 | 51  | 13 | 466064 | 2.4617 | 0.00691  |
| ENSG00000204428 | LY6G5C    | 6  | 31644461 | 31651817 | 19  | 8  | 466064 | 2.8719 | 0.00204  |
| ENSG00000204435 | CSNK2B    | 6  | 31633013 | 31638120 | 24  | 7  | 466064 | 1.6608 | 0.04837  |
| ENSG00000204444 | APOM      | 6  | 31620193 | 31625987 | 20  | 6  | 466064 | 1.8952 | 0.02903  |
| ENSG00000204463 | BAG6      | 6  | 31606805 | 31620482 | 43  | 10 | 466064 | 1.863  | 0.03123  |
| ENSG00000204472 | AIF1      | 6  | 31582961 | 31584798 | 5   | 2  | 466064 | 1.7587 | 0.03932  |
| ENSG00000204488 | PRAMEF16  | 1  | 13495254 | 13498260 | 18  | 5  | 466064 | 1.7189 | 0.04281  |
| ENSG00000204495 | PRAMEF13  | 1  | 13447414 | 13452656 | 9   | 2  | 466064 | 2.1842 | 0.01448  |
| ENSG00000204498 | NFKBIL1   | 6  | 31514647 | 31526606 | 88  | 12 | 466064 | 1.7092 | 0.0437   |
| ENSG00000204511 | MCCD1     | 6  | 31496494 | 31498009 | 23  | 3  | 466064 | 2.7006 | 0.00346  |
| ENSG00000204520 | MICA      | 6  | 31371356 | 31383092 | 320 | 18 | 466064 | 3.0669 | 0.00108  |
| ENSG00000204531 | POU5F1    | 6  | 31132119 | 31148508 | 163 | 27 | 466064 | 2.6134 | 0.00448  |
| ENSG00000204536 | CXCHR1    | 6  | 31110216 | 31126015 | 129 | 18 | 466064 | 2.3449 | 0.00952  |
| ENSG00000204560 | DHX16     | 6  | 30620896 | 30640814 | 61  | 11 | 466064 | 1.9109 | 0.02801  |
| ENSG00000204564 | C6orf136  | 6  | 30614816 | 30620987 | 10  | 5  | 466064 | 2.7521 | 0.00296  |
| ENSG00000204568 | MRPS18B   | 6  | 30585486 | 30594172 | 19  | 5  | 466064 | 2.786  | 0.00267  |
| ENSG00000204569 | PPP1R10   | 6  | 30568177 | 30586389 | 41  | 7  | 466064 | 3.721  | 9.92E-05 |
| ENSG00000204574 | ABCF1     | 6  | 30539153 | 30564956 | 42  | 10 | 466064 | 4.3137 | 8.03E-06 |
| ENSG00000204576 | PRR3      | 6  | 30524663 | 30531500 | 21  | 5  | 466064 | 3.986  | 3.36E-05 |
| ENSG00000204577 | LILRB3    | 19 | 54720147 | 54746602 | 72  | 13 | 466064 | 1.7722 | 0.03818  |
| ENSG00000204590 | GNL1      | 6  | 30509154 | 30524951 | 40  | 4  | 466064 | 4.0316 | 2.77E-05 |
| ENSG00000204592 | HLA-E     | 6  | 30457244 | 30461982 | 65  | 7  | 466064 | 2.0746 | 0.01901  |
| ENSG00000204599 | TRIM39    | 6  | 30294256 | 30311506 | 62  | 12 | 466064 | 3.903  | 4.75E-05 |
| ENSG00000204610 | TRIM15    | 6  | 30130993 | 30140473 | 66  | 8  | 466064 | 5.1765 | 1.13E-07 |
| ENSG00000204613 | TRIM10    | 6  | 30119722 | 30128711 | 95  | 6  | 466064 | 2.3626 | 0.00907  |
| ENSG00000204614 | TRIM40    | 6  | 30103885 | 30116512 | 99  | 19 | 466064 | 3.997  | 3.21E-05 |
| ENSG00000204616 | TRIM31    | 6  | 30070674 | 30080883 | 100 | 14 | 466064 | 2.8429 | 0.00224  |
| ENSG00000204618 | RNF39     | 6  | 30038043 | 30043664 | 31  | 8  | 466064 | 4.1233 | 1.87E-05 |
| ENSG00000204619 | PPP1R11   | 6  | 30034486 | 30038110 | 27  | 5  | 466064 | 3.1423 | 0.00084  |
| ENSG00000204642 | HLA-F     | 6  | 29690552 | 29706305 | 230 | 19 | 466064 | 4.1297 | 1.82E-05 |
| ENSG00000204644 | ZFP57     | 6  | 29640169 | 29648887 | 41  | 14 | 466064 | 4.843  | 6.40E-07 |
| ENSG00000204655 | MOG       | 6  | 29624758 | 29640149 | 63  | 14 | 466064 | 3.5432 | 0.0002   |
| ENSG00000204681 | GABBR1    | 6  | 29523406 | 29601753 | 314 | 30 | 466064 | 3.6367 | 0.00014  |
| ENSG00000204682 | CASC10    | 10 | 21781587 | 21786191 | 10  | 3  | 466064 | 1.7261 | 0.04217  |
| ENSG00000204683 | C10orf113 | 10 | 21414692 | 21435488 | 36  | 9  | 466064 | 2.4951 | 0.0063   |
| ENSG00000204695 | OR14J1    | 6  | 29274403 | 29275519 | 2   | 1  | 466064 | 2.4606 | 0.00694  |
| ENSG00000204701 | OR2J3     | 6  | 29079668 | 29080603 | 2   | 1  | 466064 | 2.3751 | 0.00877  |
| ENSG00000204702 | OR2J1     | 6  | 29068386 | 29069658 | 7   | 3  | 466064 | 2.3831 | 0.00858  |

|                 |            |    |          |          |     |    |        |        |         |
|-----------------|------------|----|----------|----------|-----|----|--------|--------|---------|
| ENSG00000204703 | OR2B3      | 6  | 29053985 | 29055090 | 5   | 2  | 466064 | 3.5619 | 0.00018 |
| ENSG00000204704 | OR2W1      | 6  | 29011990 | 29013017 | 3   | 2  | 466064 | 1.9658 | 0.02466 |
| ENSG00000204713 | TRIM27     | 6  | 28870779 | 28891766 | 101 | 19 | 466064 | 2.0289 | 0.02123 |
| ENSG00000204790 | CBWD6      | 9  | 69204538 | 69269662 | 275 | 43 | 466064 | 1.6587 | 0.04859 |
| ENSG00000204822 | MRPL53     | 2  | 74699085 | 74700449 | 3   | 1  | 466064 | 2.1653 | 0.01518 |
| ENSG00000204843 | DCTN1      | 2  | 74588281 | 74619214 | 22  | 7  | 466064 | 1.9006 | 0.02867 |
| ENSG00000204956 | PCDHGA1    | 5  | 1.41E+08 | 1.41E+08 | 353 | 14 | 466064 | 1.802  | 0.03577 |
| ENSG00000205047 | FLJ00104   | 16 | 87731749 | 87739290 | 41  | 5  | 466064 | 1.946  | 0.02583 |
| ENSG00000205138 | SDHAF1     | 19 | 36486090 | 36487220 | 2   | 1  | 466064 | 2.3183 | 0.01022 |
| ENSG00000205336 | GPR56      | 16 | 57644564 | 57698944 | 180 | 38 | 466064 | 1.8015 | 0.03582 |
| ENSG00000205359 | SLCO6A1    | 5  | 1.02E+08 | 1.02E+08 | 453 | 31 | 466064 | 1.733  | 0.04155 |
| ENSG00000205441 | KRTAP10-7  | 21 | 46020497 | 46022091 | 4   | 1  | 466064 | 2.2326 | 0.01279 |
| ENSG00000206260 | PRR23A     | 3  | 1.39E+08 | 1.39E+08 | 4   | 1  | 466064 | 1.7698 | 0.03838 |
| ENSG00000206344 | HCG27      | 6  | 31165537 | 31171745 | 64  | 13 | 466064 | 2.8217 | 0.00239 |
| ENSG00000212643 | ZRSR1      | 5  | 1.12E+08 | 1.12E+08 | 1   | 1  | 466064 | 1.8561 | 0.03172 |
| ENSG00000212900 | KRTAP3-2   | 17 | 39155447 | 39156138 | 2   | 1  | 466064 | 1.7295 | 0.04186 |
| ENSG00000213079 | SCAF8      | 6  | 1.55E+08 | 1.55E+08 | 361 | 36 | 466064 | 3.0787 | 0.00104 |
| ENSG00000213171 | LINGO4     | 1  | 1.52E+08 | 1.52E+08 | 18  | 2  | 466064 | 2.0467 | 0.02034 |
| ENSG00000213337 | ANKRD39    | 2  | 97502348 | 97523832 | 6   | 2  | 466064 | 2.451  | 0.00712 |
| ENSG00000213347 | MXD3       | 5  | 1.77E+08 | 1.77E+08 | 30  | 13 | 466064 | 1.8312 | 0.03353 |
| ENSG00000213619 | NDUFS3     | 11 | 47586888 | 47606114 | 29  | 12 | 466064 | 1.7093 | 0.0437  |
| ENSG00000213654 | GPSM3      | 6  | 32158543 | 32163300 | 14  | 8  | 466064 | 2.3253 | 0.01003 |
| ENSG00000213676 | ATF6B      | 6  | 32065953 | 32096030 | 56  | 17 | 466064 | 2.0587 | 0.01976 |
| ENSG00000213699 | SLC35F6    | 2  | 26987152 | 27004099 | 18  | 3  | 466064 | 2.6666 | 0.00383 |
| ENSG00000213719 | CLIC1      | 6  | 31698358 | 31707540 | 22  | 9  | 466064 | 1.7076 | 0.04386 |
| ENSG00000213799 | ZNF845     | 19 | 53837002 | 53858122 | 56  | 23 | 466064 | 1.9454 | 0.02586 |
| ENSG00000213977 | TAX1BP3    | 17 | 3566196  | 3571976  | 18  | 5  | 466064 | 1.7921 | 0.03656 |
| ENSG00000214050 | FBXO16     | 8  | 28205804 | 28347835 | 467 | 43 | 466064 | 2.022  | 0.02159 |
| ENSG00000214109 | AC008686.1 | 19 | 13890884 | 13900972 | 21  | 3  | 466064 | 1.8229 | 0.03416 |
| ENSG00000214248 | AC010336.1 | 19 | 7963689  | 7968427  | 6   | 3  | 466064 | 1.8924 | 0.02922 |
| ENSG00000214681 | IQCF5      | 3  | 51907737 | 51909600 | 5   | 2  | 466064 | 2.4254 | 0.00765 |
| ENSG00000214841 | AC005493.1 | 7  | 34685709 | 34699772 | 41  | 8  | 466064 | 2.7542 | 0.00294 |
| ENSG00000215020 | AL591684.1 | 10 | 48255279 | 48279199 | 32  | 6  | 466064 | 1.8491 | 0.03222 |
| ENSG00000215183 | MSMP       | 9  | 35752987 | 35756610 | 4   | 2  | 466064 | 2.5405 | 0.00554 |
| ENSG00000215203 | GRXCR1     | 4  | 42895284 | 43032675 | 424 | 32 | 466064 | 2.0791 | 0.01881 |
| ENSG00000215271 | HOMEZ      | 14 | 23741666 | 23768656 | 128 | 17 | 466064 | 1.8438 | 0.0326  |
| ENSG00000215346 | AF131215.5 | 8  | 10983980 | 10987745 | 11  | 3  | 466064 | 2.4114 | 0.00795 |
| ENSG00000215428 | AL354898.1 | 9  | 1.33E+08 | 1.33E+08 | 42  | 9  | 466064 | 1.9483 | 0.02569 |
| ENSG00000215455 | KRTAP10-1  | 21 | 45958864 | 45960078 | 8   | 2  | 466064 | 2.1695 | 0.01502 |
| ENSG00000215717 | TMEM167B   | 1  | 1.1E+08  | 1.1E+08  | 18  | 6  | 466064 | 2.5537 | 0.00533 |
| ENSG00000215784 | FAM72D     | 1  | 1.44E+08 | 1.44E+08 | 3   | 2  | 466064 | 3.224  | 0.00063 |
| ENSG00000217825 | AC099552.4 | 7  | 1.55E+08 | 1.55E+08 | 4   | 2  | 466064 | 1.7913 | 0.03662 |
| ENSG00000217930 | PAM16      | 16 | 4381550  | 4405608  | 59  | 13 | 466064 | 1.9274 | 0.02697 |
| ENSG00000219073 | CELA3B     | 1  | 22303514 | 22325135 | 54  | 18 | 466064 | 2.2927 | 0.01093 |
| ENSG00000220201 | ZGLP1      | 19 | 10415479 | 10420556 | 8   | 4  | 466064 | 1.923  | 0.02724 |
| ENSG00000221914 | PPP2R2A    | 8  | 26149007 | 26230196 | 348 | 32 | 466064 | 1.8668 | 0.03097 |
| ENSG00000221926 | TRIM16     | 17 | 15531274 | 15587625 | 97  | 12 | 466064 | 2.5047 | 0.00613 |
| ENSG00000221931 | OR6X1      | 11 | 1.24E+08 | 1.24E+08 | 5   | 2  | 466064 | 2.9796 | 0.00144 |
| ENSG00000221963 | APOL6      | 22 | 36044442 | 36064456 | 57  | 11 | 466064 | 2.2765 | 0.01141 |
| ENSG00000221970 | OR2A1      | 7  | 1.44E+08 | 1.44E+08 | 3   | 1  | 466064 | 1.6904 | 0.04547 |
| ENSG00000221988 | PPT2       | 6  | 32121218 | 32134011 | 27  | 12 | 466064 | 1.9388 | 0.02626 |
| ENSG00000223501 | VPS52      | 6  | 33218049 | 33239824 | 63  | 19 | 466064 | 2.007  | 0.02237 |
| ENSG00000223865 | HLA-DPB1   | 6  | 33043703 | 33054978 | 111 | 10 | 466064 | 2.4691 | 0.00677 |
| ENSG00000225556 | C2CD4D     | 1  | 1.52E+08 | 1.52E+08 | 8   | 3  | 466064 | 2.3285 | 0.00994 |
| ENSG00000226979 | LTA        | 6  | 31539831 | 31542101 | 15  | 6  | 466064 | 2.4016 | 0.00816 |
| ENSG00000227057 | WDR46      | 6  | 33246885 | 33257304 | 27  | 7  | 466064 | 2.5113 | 0.00601 |
| ENSG00000228144 | TMBIM4     | 12 | 66517697 | 66563765 | 185 | 22 | 466064 | 2.2429 | 0.01245 |
| ENSG00000228278 | ORM2       | 9  | 1.17E+08 | 1.17E+08 | 9   | 4  | 466064 | 1.9906 | 0.02326 |
| ENSG00000229314 | ORM1       | 9  | 1.17E+08 | 1.17E+08 | 12  | 6  | 466064 | 1.6918 | 0.04534 |
| ENSG00000230510 | PPP5D1     | 19 | 46984053 | 47104457 | 277 | 46 | 466064 | 1.9545 | 0.02532 |
| ENSG00000231360 | AL592284.1 | 1  | 1.44E+08 | 1.45E+08 | 83  | 18 | 466064 | 3.4063 | 0.00033 |
| ENSG00000231500 | RPS18      | 6  | 33239787 | 33244287 | 7   | 3  | 466064 | 2.2662 | 0.01172 |
| ENSG00000231925 | TAPBP      | 6  | 33267471 | 33282164 | 40  | 7  | 466064 | 1.8003 | 0.03591 |
| ENSG00000232040 | SCAND3     | 6  | 28539407 | 28583989 | 95  | 18 | 466064 | 2.25   | 0.01222 |
| ENSG00000232056 | AC092687.4 | 2  | 10987703 | 10995081 | 29  | 10 | 466064 | 2.2845 | 0.01117 |
| ENSG00000232810 | TNF        | 6  | 31543344 | 31546113 | 12  | 6  | 466064 | 2.2558 | 0.01204 |
| ENSG00000233280 | CRYBG3     | 3  | 97540884 | 97594132 | 76  | 6  | 466064 | 2.1901 | 0.01426 |
| ENSG00000234127 | TRIM26     | 6  | 30152232 | 30181204 | 158 | 15 | 466064 | 3.4307 | 0.0003  |
| ENSG00000234438 | KBTBD13    | 15 | 65369154 | 65372276 | 8   | 4  | 466064 | 1.6649 | 0.04797 |
| ENSG00000234829 | IFNA17     | 9  | 21227242 | 21228221 | 5   | 1  | 466064 | 2.1884 | 0.01432 |
| ENSG00000235863 | B3GALT4    | 6  | 33244917 | 33252609 | 20  | 7  | 466064 | 2.6164 | 0.00444 |
| ENSG00000236104 | ZBTB22     | 6  | 33282183 | 33285719 | 11  | 5  | 466064 | 3.0542 | 0.00113 |
| ENSG00000236637 | IFNA4      | 9  | 21186617 | 21187598 | 3   | 1  | 466064 | 1.7093 | 0.0437  |

|                 |                |    |          |          |      |     |        |        |          |
|-----------------|----------------|----|----------|----------|------|-----|--------|--------|----------|
| ENSG00000237330 | RNF223         | 1  | 1006346  | 1009687  | 6    | 2   | 466064 | 1.8446 | 0.03255  |
| ENSG00000237441 | RGL2           | 6  | 33259431 | 33267101 | 16   | 5   | 466064 | 2.2658 | 0.01173  |
| ENSG00000237515 | SHISA9         | 16 | 12995477 | 13334272 | 1326 | 108 | 466064 | 1.8272 | 0.03384  |
| ENSG00000237541 | HLA-DQA2       | 6  | 32709119 | 32714992 | 166  | 10  | 466064 | 2.1361 | 0.01634  |
| ENSG00000237649 | KIFC1          | 6  | 33359313 | 33377701 | 40   | 9   | 466064 | 2.7242 | 0.00322  |
| ENSG00000239305 | RNF103         | 2  | 86830516 | 86850989 | 58   | 9   | 466064 | 2.7343 | 0.00313  |
| ENSG00000239665 | RP11-295P9.3   | 10 | 13652047 | 13710299 | 258  | 37  | 466064 | 2.8216 | 0.00239  |
| ENSG00000239732 | TLR9           | 3  | 52255096 | 52273183 | 31   | 8   | 466064 | 1.7365 | 0.04123  |
| ENSG00000239779 | WBP1           | 2  | 74685456 | 74688018 | 6    | 1   | 466064 | 2.4969 | 0.00627  |
| ENSG00000240053 | LY6G5B         | 6  | 31637944 | 31641553 | 14   | 7   | 466064 | 2.1986 | 0.01395  |
| ENSG00000240065 | PSMB9          | 6  | 32811913 | 32827362 | 140  | 16  | 466064 | 1.8095 | 0.03519  |
| ENSG00000240184 | PCDHGC3        | 5  | 1.41E+08 | 1.41E+08 | 54   | 11  | 466064 | 2.3757 | 0.00876  |
| ENSG00000240764 | PCDHGC5        | 5  | 1.41E+08 | 1.41E+08 | 33   | 9   | 466064 | 2.5642 | 0.00517  |
| ENSG00000241186 | TDGF1          | 3  | 46616045 | 46668033 | 177  | 19  | 466064 | 2.3187 | 0.01021  |
| ENSG00000241322 | CDRT1          | 17 | 15468798 | 15522826 | 182  | 21  | 466064 | 1.689  | 0.04561  |
| ENSG00000241370 | RPP21          | 6  | 30312908 | 30314661 | 9    | 3   | 466064 | 2.7985 | 0.00257  |
| ENSG00000241553 | ARPC4          | 3  | 9834179  | 9849410  | 33   | 10  | 466064 | 2.1606 | 0.01536  |
| ENSG00000241837 | ATP5O          | 21 | 35275757 | 35288284 | 44   | 8   | 466064 | 1.6956 | 0.04498  |
| ENSG00000242419 | PCDHGC4        | 5  | 1.41E+08 | 1.41E+08 | 39   | 10  | 466064 | 2.5062 | 0.0061   |
| ENSG00000242498 | C15orf38       | 15 | 90443159 | 90456188 | 33   | 6   | 466064 | 2.056  | 0.01989  |
| ENSG00000243649 | CFB            | 6  | 31895475 | 31919861 | 61   | 19  | 466064 | 2.152  | 0.0157   |
| ENSG00000243729 | OR5V1          | 6  | 29323007 | 29399744 | 334  | 27  | 466064 | 2.6776 | 0.00371  |
| ENSG00000243749 | ZMYM6NB        | 1  | 35447136 | 35450954 | 4    | 2   | 466064 | 1.9848 | 0.02358  |
| ENSG00000244255 | CFB            | 6  | 31895475 | 31919825 | 61   | 19  | 466064 | 2.152  | 0.0157   |
| ENSG00000244482 | LILRA6         | 19 | 54720737 | 54746649 | 72   | 13  | 466064 | 1.7722 | 0.03818  |
| ENSG00000244731 | C4A            | 6  | 31949801 | 31970458 | 64   | 19  | 466064 | 2.2961 | 0.01084  |
| ENSG00000248167 | TRIM39-RPP21   | 6  | 30297359 | 30314631 | 61   | 12  | 466064 | 3.904  | 4.73E-05 |
| ENSG00000249624 | AP000295.9     | 21 | 34619079 | 34655517 | 111  | 19  | 466064 | 1.8997 | 0.02874  |
| ENSG00000249693 | THEGL          | 4  | 57396775 | 57469673 | 272  | 20  | 466064 | 1.7104 | 0.0436   |
| ENSG00000249852 | AC145676.2     | 7  | 227554   | 229557   | 15   | 4   | 466064 | 2.2523 | 0.01215  |
| ENSG00000249915 | PDCD6          | 5  | 271736   | 353971   | 256  | 16  | 466064 | 1.7228 | 0.04246  |
| ENSG00000250021 | C15orf38-AP3S2 | 15 | 90377540 | 90456114 | 238  | 18  | 466064 | 2.5469 | 0.00543  |
| ENSG00000250151 | ARPC4-TTLL3    | 3  | 9834766  | 9877085  | 110  | 25  | 466064 | 2.0425 | 0.02055  |
| ENSG00000250506 | CDK3           | 17 | 73996987 | 74002080 | 20   | 8   | 466064 | 1.8535 | 0.03191  |
| ENSG00000251380 | C5orf20        | 5  | 1.35E+08 | 1.35E+08 | 3    | 2   | 466064 | 1.7414 | 0.04081  |
| ENSG00000251537 | RP11-385D13.1  | 17 | 15474805 | 15554967 | 216  | 18  | 466064 | 2.1    | 0.01787  |
| ENSG00000253159 | PCDHGA12       | 5  | 1.41E+08 | 1.41E+08 | 107  | 16  | 466064 | 2.1109 | 0.01739  |
| ENSG00000253305 | PCDHGB6        | 5  | 1.41E+08 | 1.41E+08 | 167  | 15  | 466064 | 1.8876 | 0.02954  |
| ENSG00000253426 | RP11-10A14.4   | 8  | 9009252  | 9025646  | 59   | 9   | 466064 | 2.3839 | 0.00856  |
| ENSG00000253485 | PCDHGA5        | 5  | 1.41E+08 | 1.41E+08 | 284  | 15  | 466064 | 1.8004 | 0.0359   |
| ENSG00000253537 | PCDHGA7        | 5  | 1.41E+08 | 1.41E+08 | 212  | 14  | 466064 | 1.8273 | 0.03383  |
| ENSG00000253731 | PCDHGA6        | 5  | 1.41E+08 | 1.41E+08 | 248  | 14  | 466064 | 1.7824 | 0.03734  |
| ENSG00000253767 | PCDHGA8        | 5  | 1.41E+08 | 1.41E+08 | 195  | 14  | 466064 | 1.8195 | 0.03442  |
| ENSG00000253846 | PCDHGA10       | 5  | 1.41E+08 | 1.41E+08 | 152  | 16  | 466064 | 1.925  | 0.02712  |
| ENSG00000253873 | PCDHGA11       | 5  | 1.41E+08 | 1.41E+08 | 142  | 15  | 466064 | 1.9542 | 0.02534  |
| ENSG00000253910 | PCDHGB2        | 5  | 1.41E+08 | 1.41E+08 | 298  | 16  | 466064 | 1.8208 | 0.03432  |
| ENSG00000253953 | PCDHGB4        | 5  | 1.41E+08 | 1.41E+08 | 198  | 14  | 466064 | 1.8227 | 0.03418  |
| ENSG00000254019 | RP11-10J21.3   | 8  | 1.42E+08 | 1.42E+08 | 13   | 4   | 466064 | 2.3415 | 0.0096   |
| ENSG00000254122 | PCDHGB7        | 5  | 1.41E+08 | 1.41E+08 | 145  | 16  | 466064 | 1.9493 | 0.02563  |
| ENSG00000254221 | PCDHGB1        | 5  | 1.41E+08 | 1.41E+08 | 329  | 15  | 466064 | 1.7818 | 0.03739  |
| ENSG00000254245 | PCDHGA3        | 5  | 1.41E+08 | 1.41E+08 | 340  | 15  | 466064 | 1.7946 | 0.03636  |
| ENSG00000254415 | SIGLEC14       | 19 | 52145806 | 52150054 | 6    | 3   | 466064 | 2.5504 | 0.00538  |
| ENSG00000254656 | RTL1           | 14 | 1.01E+08 | 1.01E+08 | 8    | 3   | 466064 | 2.9414 | 0.00163  |
| ENSG00000254870 | ATP6V1G2-DDX3  | 6  | 31497996 | 31514385 | 176  | 21  | 466064 | 2.9713 | 0.00148  |
| ENSG00000255152 | MSH5-SAPCD1    | 6  | 31707797 | 31732628 | 51   | 13  | 466064 | 2.4617 | 0.00691  |
| ENSG00000255423 | EBLN2          | 3  | 73110810 | 73112488 | 4    | 2   | 466064 | 2.2615 | 0.01187  |
| ENSG00000255529 | POLR2M         | 15 | 57884231 | 58074960 | 625  | 26  | 466064 | 1.8263 | 0.0339   |
| ENSG00000255833 | TIFAB          | 5  | 1.35E+08 | 1.35E+08 | 3    | 2   | 466064 | 1.7414 | 0.04081  |
| ENSG00000255940 | REXO1L10P      | 8  | 86756718 | 86758745 | 4    | 2   | 466064 | 2.1496 | 0.01579  |
| ENSG00000256043 | CTSO           | 4  | 1.57E+08 | 1.57E+08 | 59   | 11  | 466064 | 2.075  | 0.019    |
| ENSG00000257327 | RP11-650K20.3  | 12 | 1.04E+08 | 1.04E+08 | 14   | 6   | 466064 | 1.7575 | 0.03942  |
| ENSG00000257726 | RP11-116D17.1  | 12 | 1.16E+08 | 1.16E+08 | 20   | 4   | 466064 | 1.6971 | 0.04484  |
| ENSG00000257949 | TEN1           | 17 | 73975301 | 73996667 | 90   | 25  | 466064 | 2.8954 | 0.00189  |
| ENSG00000258839 | MC1R           | 16 | 89978527 | 89987385 | 44   | 11  | 466064 | 2.5835 | 0.00489  |
| ENSG00000258947 | TUBB3          | 16 | 89987800 | 90005169 | 64   | 13  | 466064 | 2.5945 | 0.00474  |
| ENSG00000260001 | TGFBR3L        | 19 | 7981030  | 7983982  | 10   | 5   | 466064 | 3.023  | 0.00125  |
| ENSG00000261147 | RP11-697E2.6   | 15 | 90792788 | 90815440 | 140  | 11  | 466064 | 1.742  | 0.04075  |
| ENSG00000261934 | PCDHGA9        | 5  | 1.41E+08 | 1.41E+08 | 177  | 14  | 466064 | 1.8622 | 0.03129  |
| ENSG00000262039 | RP11-81K2.1    | 17 | 47448102 | 47554350 | 266  | 16  | 466064 | 2.5517 | 0.00536  |
| ENSG00000262209 | PCDHGB3        | 5  | 1.41E+08 | 1.41E+08 | 265  | 16  | 466064 | 1.8254 | 0.03397  |
| ENSG00000262246 | CORO7          | 16 | 4404543  | 4475706  | 185  | 16  | 466064 | 3.0682 | 0.00108  |
| ENSG00000262576 | PCDHGA4        | 5  | 1.41E+08 | 1.41E+08 | 318  | 15  | 466064 | 1.781  | 0.03746  |
| ENSG00000263020 | CSNK2B-LY6G5E  | 6  | 31633879 | 31641323 | 30   | 11  | 466064 | 2.2814 | 0.01126  |

|                 |               |    |          |          |      |    |        |        |         |
|-----------------|---------------|----|----------|----------|------|----|--------|--------|---------|
| ENSG00000263136 | PAGR1         | 16 | 29827832 | 29831438 | 6    | 1  | 466064 | 1.9813 | 0.02378 |
| ENSG00000263155 | MYZAP         | 15 | 57884139 | 57977562 | 330  | 21 | 466064 | 1.7514 | 0.03994 |
| ENSG00000264324 | RP11-287D1.3  | 2  | 74438731 | 74590504 | 129  | 16 | 466064 | 2.2061 | 0.01369 |
| ENSG00000265690 | RP11-5A19.5   | 16 | 67197288 | 67199718 | 5    | 2  | 466064 | 2.4818 | 0.00654 |
| ENSG00000266953 | RP11-618P17.4 | 19 | 34887220 | 34900269 | 35   | 4  | 466064 | 1.8189 | 0.03446 |
| ENSG00000267748 | CTB-102L5.4   | 19 | 38779791 | 38795550 | 61   | 8  | 466064 | 1.9306 | 0.02677 |
| ENSG00000267857 | PRED58        | 21 | 46520728 | 46534873 | 39   | 11 | 466064 | 2.602  | 0.00463 |
| ENSG00000267918 | AL117190.2    | 14 | 1.01E+08 | 1.01E+08 | 4    | 2  | 466064 | 3.0314 | 0.00122 |
| ENSG00000268154 | AL591806.1    | 1  | 1.61E+08 | 1.61E+08 | 1    | 1  | 466064 | 1.7536 | 0.03975 |
| ENSG00000268461 | AC007204.1    | 19 | 20047769 | 20048639 | 2    | 1  | 466064 | 1.9908 | 0.02325 |
| ENSG00000268805 | PRED57        | 21 | 46511596 | 46515493 | 21   | 4  | 466064 | 1.8554 | 0.03177 |
| ENSG00000268818 | AL049747.1    | 22 | 36023040 | 36031181 | 15   | 5  | 466064 | 1.8739 | 0.03047 |
| ENSG00000268821 | AC068039.1    | 2  | 1.73E+08 | 1.73E+08 | 13   | 5  | 466064 | 2.6001 | 0.00466 |
| ENSG00000268885 | AC026740.1    | 5  | 667759   | 668839   | 4    | 2  | 466064 | 2.4068 | 0.00805 |
| ENSG00000269094 | AC006449.1    | 17 | 36884086 | 36884451 | 4    | 2  | 466064 | 2.3676 | 0.00895 |
| ENSG00000269308 | AL645608.2    | 1  | 818043   | 819983   | 9    | 2  | 466064 | 2.365  | 0.00901 |
| ENSG00000269554 | AL590822.2    | 1  | 2121237  | 2123179  | 1    | 1  | 466064 | 1.768  | 0.03853 |
| ENSG00000269781 | FLJ20306      | 7  | 6522922  | 6524873  | 4    | 2  | 466064 | 1.8691 | 0.0308  |
| ENSG00000270617 | URGCP-MRPS24  | 7  | 43906157 | 43946188 | 121  | 16 | 466064 | 2.3316 | 0.00986 |
| ENSG00000270898 | ASB3          | 2  | 53897430 | 54087297 | 521  | 24 | 466064 | 1.6737 | 0.04709 |
| ENSG00000272410 | RP11-438J1.1  | 3  | 10291056 | 10327480 | 102  | 14 | 466064 | 1.645  | 0.04999 |
| ENSG00000273079 | GRIN2B        | 12 | 13693165 | 14133053 | 1388 | 89 | 466064 | 2.0661 | 0.01941 |
| ENSG00000273266 | HOXC4         | 12 | 54447661 | 54449814 | 1    | 1  | 466064 | 1.8351 | 0.03324 |



|                   |   |           |                    |   |             |   |         |          |         |          |          |         |          |          |         |          |          |          |    |
|-------------------|---|-----------|--------------------|---|-------------|---|---------|----------|---------|----------|----------|---------|----------|----------|---------|----------|----------|----------|----|
| ENSG00000183625   | 3 | COCR3     | 46256646 rs138860  | 3 | 46276878 A  | T | 0.33698 | -0.20255 | 0.08211 | 1.38E-02 | 0.59902  | 0.00775 | #####    | -0.33813 | 0.13715 | 1.37E-02 | 6.76E-03 | 4.74E-02 | 20 |
| ENSG00000184068   | 3 | RNF123    | 49742947 rs485888  | 3 | 49715354 G  | A | 0.166   | 0.246242 | 0.11505 | 3.27E-02 | 0.1053   | 0.01075 | 1.23E-22 | 2.3384   | 1.11833 | 3.65E-02 | 3.65E-02 | 4.38E-02 | 20 |
| ENSG00000184042   | 3 | CANX2D2   | 50479954 rs622608  | 3 | 50474624 A  | G | 0.10835 | 0.45544  | 0.12604 | 3.72E-04 | 0.14247  | 0.0128  | 9.98E-29 | -3.19759 | 19.9435 | 7.01E-04 | 7.01E-04 | 8.53E-01 | 20 |
| ENSG00000114735   | 3 | HEMK      | 50614474 rs223224  | 3 | 50606807 G  | G | 0.12425 | 0.348696 | 0.11207 | 1.52E-03 | -0.21539 | 0.01238 | 7.80E-68 | -1.61893 | 5.2033  | 8.69E-03 | 1.87E-01 | 8.53E-02 | 20 |
| ENSG0000041880    | 3 | PARR3     | 51979622 rs622603  | 3 | 51163444 G  | T | 0.166   | 0.222777 | 0.09847 | 2.37E-02 | 0.07132  | 0.01247 | 1.06E-08 | 3.12364  | 1.48468 | 3.54E-02 | 3.54E-02 | 9.50E-01 | 6  |
| ENSG00000162244   | 3 | RPL29     | 52028787 rs116538  | 3 | 51907243 C  | A | 0.01193 | 1.32137  | 0.58184 | 2.31E-02 | -0.71998 | 0.011   | 1.01E-12 | -1.83528 | 0.84815 | 3.05E-02 | 1.52E-01 | 2.22E-01 | 18 |
| ENSG00000164807   | 3 | POCIA1    | 52148987 rs352150  | 3 | 52029995 G  | A | 0.09443 | -0.20353 | 0.10378 | 4.77E-02 | 0.32554  | 0.01528 | #####    | -0.63137 | 0.32018 | 4.78E-02 | 4.08E-01 | 9.99E-01 | 20 |
| ENSG00000114841   | 3 | PCNA      | 52317052 rs622608  | 3 | 52317052 G  | G | 0.1437  | 0.31043  | 0.1437  | 0.00000  | 0.00000  | 0.00000 | #####    | 0.00000  | 0.00000 | 0.00000  | 0.00000  | 0.00000  | 20 |
| ENSG00000168297   | 3 | PXK       | 58365177 rs763555  | 3 | 58402336 C  | C | 0.27734 | 0.193941 | 0.01737 | 6.85E-03 | 0.31048  | 0.00928 | #####    | 0.624645 | 0.23064 | 6.76E-02 | 3.00E-01 | 5.56E-01 | 20 |
| ENSG00000144744   | 3 | UBA3      | 69116720 rs676689  | 3 | 69120074 C  | T | 0.39861 | -0.1786  | 0.07344 | 1.46E-02 | 0.1149   | 0.01198 | 8.81E-22 | -1.55442 | 0.65683 | 1.80E-02 | 6.27E-02 | 1.21E-01 | 17 |
| ENSG00000144736   | 3 | SHQ1      | 72854746 rs622616  | 3 | 72811827 T  | C | 0.2326  | -0.19554 | 0.07717 | 1.18E-02 | 0.09213  | 0.00961 | 5.13E-24 | -2.0131  | 0.62207 | 1.43E-02 | 3.24E-02 | 1.53E-01 | 20 |
| ENSG00000163320   | 3 | CGGBP1    | 88150064 rs126295  | 3 | 88117228 C  | C | 0.12227 | -0.28942 | 0.10078 | 4.48E-03 | 0.56512  | 0.0116  | #####    | -0.50683 | 0.17863 | 4.55E-03 | 1.07E-02 | 2.51E-01 | 17 |
| ENSG00000184220   | 3 | PCNA      | 92542419 rs622608  | 3 | 92542419 G  | T | 0.1437  | 0.15423  | 0.1437  | 0.00000  | 0.00000  | 0.00000 | #####    | 0.00000  | 0.00000 | 0.00000  | 0.00000  | 0.00000  | 20 |
| ENSG00000360504   | 3 | TBC1D23   | 100011968 rs492106 | 3 | 100034849 A | T | 0.44036 | 0.145767 | 0.01762 | 4.18E-02 | 0.09668  | 0.0117  | 1.93E-15 | -1.0575  | 0.76477 | 4.87E-02 | 4.87E-02 | 3.28E-01 | 20 |
| ENSG00000114439   | 3 | BBX       | 10738597 rs169768  | 3 | 107262113 A | G | 0.10437 | -0.21784 | 0.10406 | 3.63E-02 | -0.27184 | 0.01271 | #####    | 0.801363 | 0.38464 | 3.72E-02 | 2.02E-01 | 3.88E-01 | 20 |
| ENSG00000196776   | 3 | CD47      | 107786008 rs326361 | 3 | 107819041 A | G | 0.4493  | -0.15169 | 0.07284 | 3.73E-02 | 0.31123  | 0.00778 | #####    | -0.38783 | 0.1864  | 3.75E-02 | 7.52E-01 | 3.26E-01 | 20 |
| ENSG00000121570   | 3 | PDP4A     | 10950703 rs118365  | 3 | 109446621 A | G | 0.0696  | -0.39294 | 0.19037 | 3.90E-02 | 0.37195  | 0.01494 | #####    | -1.05643 | 0.51358 | 3.97E-02 | 1.19E-01 | 2.00E-01 | 20 |
| ENSG00000163617   | 3 | CDC191    | 14272892 rs370793  | 3 | 11276860 T  | G | 0.34118 | 0.25577  | 0.06255 | 5.47E-03 | 0.40852  | 0.00929 | 1.30E-22 | -1.18957 | 0.47865 | 6.00E-03 | 6.00E-02 | 6.00E-01 | 20 |
| ENSG00000181722   | 3 | ZBTB20    | 114461529 rs798285 | 3 | 114448655 G | C | 0.02286 | 0.58204  | 0.20626 | 1.16E-02 | -0.38671 | 0.04698 | 1.80E-16 | -1.50511 | 0.62381 | 1.58E-02 | 1.05E-02 | 5.32E-02 | 12 |
| ENSG00000144847   | 3 | IGSF11    | 118742159 rs678420 | 3 | 118931389 C | T | 0.0338  | 0.503689 | 0.21589 | 1.98E-02 | 0.46941  | 0.01973 | #####    | 1.07303  | 0.46213 | 2.02E-02 | 9.53E-02 | 5.67E-01 | 20 |
| ENSG000001176142  | 3 | TMEM39A   | 119168012 rs117143 | 3 | 119129803 C | G | 0.36581 | -0.15423 | 0.07167 | 3.14E-02 | -0.09589 | 0.00838 | 2.52E-30 | 1.60837  | 0.76048 | 3.04E-02 | 5.44E-02 | 8.50E-01 | 20 |
| ENSG00000082701   | 3 | GSK3B     | 11967871 rs1697648 | 3 | 119827508 T | A | 0.22167 | -0.18743 | 0.09484 | 4.87E-02 | 0.30276  | 0.00891 | #####    | -0.55302 | 0.27853 | 4.71E-02 | 1.61E-01 | 8.11E-01 | 20 |
| ENSG00000249864   | 3 | LINC02021 | 120633971 rs407121 | 3 | 120629623 A | G | 0.47424 | -0.24865 | 0.09698 | 3.97E-02 | -0.62261 | 0.01202 | #####    | 0.226419 | 1.01515 | 4.01E-02 | 8.09E-02 | 6.94E-01 | 20 |
| ENSG00000196353   | 3 | CPNE4     | 131628326 rs130777 | 3 | 131563648 T | A | 0.26243 | -0.16234 | 0.09542 | 4.12E-02 | -0.07567 | 0.00879 | 1.74E-18 | 2.14534  | 1.0995  | 4.70E-02 | 1.38E-01 | 4.04E-01 | 20 |
| ENSG00000240890   | 3 | GZE3P1    | 142106627 rs677693 | 3 | 132102933 C | G | 0.45726 | -0.19352 | 0.07319 | 1.89E-03 | 0.09958  | 0.01007 | 4.60E-23 | -1.94332 | 0.7608  | 1.06E-02 | 6.40E-02 | 1.39E-01 | 18 |
| ENSG00000163755   | 3 | CPA3      | 148599013 rs176480 | 3 | 148619410 T | T | 0.38966 | 0.181146 | 0.07319 | 1.33E-02 | 0.15680  | 0.00813 | 3.92E-46 | 1.56345  | 0.64111 | 1.47E-02 | 9.03E-02 | 1.25E-01 | 20 |
| ENSG00000163755   | 3 | HPS3      | 148989445 rs342914 | 3 | 148818651 T | C | 0.02485 | 0.482063 | 0.2278  | 3.43E-02 | 0.53335  | 0.02231 | #####    | 0.903837 | 0.42876 | 3.50E-02 | 7.01E-01 | 2.26E-01 | 20 |
| ENSG00000163681   | 3 | CPNE4     | 15384973 rs130777  | 3 | 15384973 G  | T | 0.2733  | 0.24201  | 0.09255 | 5.47E-03 | 0.40852  | 0.01192 | #####    | 0.634567 | 0.15824 | 4.44E-02 | 1.58E-02 | 1.98E-01 | 20 |
| ENSG00000117121   | 3 | KN3MB3    | 178971160 rs617964 | 3 | 178930079 A | C | 0.19483 | 0.245554 | 0.06621 | 1.03E-02 | 0.11347  | 0.01142 | 2.99E-23 | 2.16403  | 0.87461 | 1.34E-02 | 4.08E-02 | 3.37E-01 | 20 |
| ENSG000001175193  | 3 | PARL      | 183574947 rs764474 | 3 | 183596184 T | C | 0.45129 | 0.188315 | 0.07097 | 7.97E-03 | -0.16292 | 0.00801 | 5.74E-92 | -1.15588 | 0.43929 | 8.51E-02 | 3.42E-01 | 2.94E-02 | 20 |
| ENSG00000213139   | 3 | CRYGS     | 186260360 rs109372 | 3 | 186260740 G | A | 0.44732 | 0.163897 | 0.02172 | 2.31E-02 | 0.13546  | 0.00797 | 8.70E-65 | 1.20991  | 0.53713 | 2.53E-03 | 9.24E-02 | 2.65E-01 | 20 |
| ENSG00000173890   | 3 | XXYL1T    | 194980452 rs62270  | 3 | 194992240 G | A | 0.2167  | 0.217562 | 0.06875 | 8.45E-03 | -0.19502 | 0.01038 | 9.54E-79 | -1.11559 | 0.43394 | 1.01E-02 | 3.98E-01 | 4.28E-01 | 20 |
| ENSG000001954805  | 3 | XXYL1     | 194980452 rs62270  | 3 | 194992240 G | A | 0.2167  | 0.217562 | 0.06875 | 8.45E-03 | -0.19502 | 0.01038 | 9.54E-79 | -1.11559 | 0.43394 | 1.01E-02 | 3.98E-01 | 4.28E-01 | 20 |
| ENSG00000072840   | 3 | EVC       | 5771848 rs229115   | 3 | 5721021 G   | C | 0.09543 | -0.39044 | 0.16283 | 1.65E-02 | 0.1287   | 0.01461 | 1.24E-18 | -0.3338  | 3.1099  | 2.07E-02 | 4.60E-02 | 1.42E-01 | 20 |
| ENSG00000013288   | 3 | MAN2B2    | 6006995 rs117307   | 3 | 6145945 A   | T | 0.16899 | -0.19829 | 0.09747 | 4.19E-02 | -0.61024 | 0.0114  | #####    | 0.324929 | 0.15984 | 4.21E-02 | 2.74E-01 | 1.13E-01 | 20 |
| ENSG00000109743   | 3 | BST1      | 15722254 rs345599  | 3 | 15730146 G  | T | 0.43738 | 0.151751 | 0.07235 | 3.98E-02 | 0.48273  | 0.00752 | #####    | 0.314358 | 0.14995 | 3.60E-02 | 3.01E-01 | 7.63E-01 | 20 |
| ENSG00000153012   | 3 | LGJ2      | 25016485 rs168785  | 3 | 25000060 G  | A | 0.1332  | -0.22736 | 0.09675 | 1.78E-02 | -0.16928 | 0.0113  | 1.00E-50 | 1.34309  | 0.57267 | 1.90E-02 | 3.77E-02 | 4.43E-01 | 16 |
| ENSG0000025117020 | 3 | LINC02506 | 32033971 rs407121  | 3 | 32033971 G  | T | 0.29125 | -0.18103 | 0.07658 | 1.81E-02 | -0.12098 | 0.00836 | 2.21E-98 | 1.75915  | 0.73853 | 2.05E-02 | 0.9500   | 1.98E-01 | 20 |
| ENSG00000109790   | 3 | KLHL5     | 39087588 rs306073  | 3 | 38953128 C  | T | 0.40159 | -0.15141 | 0.07316 | 3.85E-02 | -0.44089 | 0.00776 | #####    | 0.343425 | 0.16603 | 3.86E-02 | 3.37E-01 | 8.87E-01 | 20 |
| ENSG00000163694   | 3 | RBM47     | 40529082 rs131401  | 3 | 40735334 A  | G | 0.36779 | -0.15169 | 0.07391 | 4.01E-02 | 0.20728  | 0.00893 | #####    | -0.7318  | 0.35797 | 4.09E-02 | 3.20E-01 | 5.65E-01 | 20 |
| ENSG00000179299   | 3 | NSUN7     | 40781958 rs352426  | 3 | 40734812 G  | C | 0.36978 | -0.15169 | 0.07391 | 4.01E-02 | 0.20728  | 0.00893 | #####    | -0.7318  | 0.35797 | 4.09E-02 | 3.20E-01 | 5.65E-01 | 20 |
| ENSG00000204870   | 3 | ARL4A2    | 40788427 rs257318  | 3 | 40735769 T  | C | 0.37873 | -0.1479  | 0.07392 | 3.54E-02 | 0.29582  | 0.02083 | 9.11E-46 | -0.49995 | 0.25235 | 4.76E-02 | 5.00E-02 | 7.42E-01 | 20 |
| ENSG00000164042   | 3 | LINC114   | 413630726 rs622608 | 3 | 413630726 G | T | 0.39653 | 0.15895  | 0.07392 | 3.25E-02 | -0.11299 | 0.00925 | 2.43E-47 | 1.05426  | 0.6384  | 4.33E-02 | 1.95E-02 | 4.85E-01 | 20 |
| ENSG00000151806   | 3 | GUF1      | 44691693 rs345471  | 3 | 44678287 T  | C | 0.53877 | 0.160855 | 0.07952 | 4.24E-02 | 0.33619  | 0.00893 | #####    | 0.478466 | 0.22411 | 3.28E-02 | 9.07E-02 | 7.19E-01 | 20 |
| ENSG00000163281   | 3 | GNDPA2    | 44716248 rs117243  | 3 | 44725334 C  | G | 0.24453 | 0.2034   | 0.0936  | 2.98E-02 | 0.16907  | 0.00946 | 1.98E-71 | 1.20268  | 0.5577  | 3.10E-02 | 9.97E-02 | 6.44E-02 | 20 |
| ENSG00000109189   | 3 | USP46     | 53492921 rs999454  | 3 | 53578213 C  | G | 0.13121 | -0.24235 | 0.10986 | 2.74E-02 | 0.14024  | 0.01225 | 2.49E-30 | -1.72805 | 0.79779 | 3.03E-02 | 1.48E-01 | 1.30E-02 | 20 |
| ENSG00000226950   | 3 | DANCR     | 53582557 rs732486  | 3 | 53570498 A  | C | 0.13121 | -0.24235 | 0.10986 | 2.74E-02 | 0.14024  | 0.01225 | #####    | -0.35167 | 0.15785 | 2.59E-02 | 1.01E-01 | 1.95E-02 | 20 |
| ENSG00000181381   | 3 | LINC114   | 54422119 rs622608  | 3 | 54422119 G  | T | 0.21869 | -0.23073 | 0.10915 | 2.17E-02 | 0.48832  | 0.01599 | #####    | 0.763348 | 0.33398 | 2.23E-02 | 3.16E-01 | 5.59E-01 | 20 |
|                   |   |           |                    |   |             |   |         |          |         |          |          |         |          |          |         |          |          |          |    |



|                 |    |           |                    |    |           |   |   |         |          |         |          |          |         |          |          |          |           |          |          |          |    |
|-----------------|----|-----------|--------------------|----|-----------|---|---|---------|----------|---------|----------|----------|---------|----------|----------|----------|-----------|----------|----------|----------|----|
| ENSG00000114005 | 11 | PIK3C22A  | 17164403 rs511119  | 11 | 17215117  | A | G | 0.49702 | 0.152259 | 0.07162 | 3.32E-02 | 0.48758  | 0.00891 | #####    | 0.31283  | 0.14699  | 3.33E-02  | 7.95E-02 | 1.95E-01 | 20       |    |
| ENSG00000170081 | 11 | NUCB2     | 17300610 rs214081  | 11 | 17299564  | A | T | 0.42842 | 0.158553 | 0.02711 | 2.79E-02 | 0.41385  | 0.01151 | #####    | 0.383115 | 0.17455  | 2.82E-02  | 2.28E-02 | 6.97E-01 | 20       |    |
| ENSG00000179102 | 11 | CSTF3     | 33141323 rs103360  | 11 | 33198260  | A | G | 0.2333  | 0.22662  | 0.07949 | 3.07E-03 | 0.1664   | 0.20679 | #####    | 8.93E-00 | -1.24166 | 4.803E-03 | 9.74E-03 | 9.22E-02 | 1.12E-01 | 20 |
| ENSG00000166352 | 11 | ITFAP     | 36655437 rs375887  | 11 | 36655089  | G | A | 0.3236  | -0.27698 | 0.12731 | 3.01E-02 | 0.14941  | 0.01221 | 1.23E-02 | #####    | 8.5382   | 0.8865    | 2.82E-02 | 1.03E-01 | 4.52E-01 | 20 |
| ENSG00000109919 | 11 | MTCH2     | 47651521 rs143001  | 11 | 47722571  | A | G | 0.06362 | 0.46068  | 0.1827  | 1.17E-02 | -0.23929 | 0.01974 | 7.9E-34  | -1.92519 | 0.77986  | 1.36E-02  | 1.04E-01 | 2.72E-01 | 20       |    |
| ENSG00000134780 | 11 | DAGLA     | 61481189 rs169212  | 11 | 61417472  | G | A | 0.54672 | -0.17082 | 0.07275 | 1.89E-02 | -0.12002 | 0.00797 | 3.31E-51 | 1.42322  | 0.61344  | 2.03E-02  | 1.38E-01 | 7.65E-01 | 20       |    |
| ENSG00000089897 | 11 | GANAB     | 62403201 rs118903  | 11 | 62413673  | T | G | 0.16103 | -0.2996  | 0.1068  | 5.03E-03 | -0.28793 | 0.01789 | 2.73E-58 | 1.04052  | 0.3765   | 5.72E-03  | 4.44E-03 | 8.60E-01 | 20       |    |
| ENSG00000165688 | 11 | TRAF3     | 62519233 rs193669  | 11 | 62519233  | G | A | 0.35587 | 0.19179  | 0.07629 | 3.07E-03 | 0.1664   | 0.20679 | #####    | 8.93E-00 | -1.24166 | 4.803E-03 | 9.74E-03 | 9.22E-02 | 1.12E-01 | 20 |
| ENSG00000185475 | 11 | TIEM17B9  | 62565382 rs14034   | 11 | 62565382  | G | A | 0.36481 | 0.17708  | 0.07321 | 1.55E-02 | -0.11392 | 0.00823 | 1.48E-43 | 1.55549  | 0.65234  | 1.71E-02  | 1.00E-01 | 1.71E-01 | 20       |    |
| ENSG00000162231 | 11 | NXF1      | 62566864 rs4693    | 11 | 62564009  | T | C | 0.37674 | 0.176458 | 0.07686 | 1.54E-02 | 0.20261  | 0.00809 | #####    | 0.870916 | 0.36126  | 1.59E-02  | 1.12E-01 | 2.74E-01 | 20       |    |
| ENSG00000168070 | 11 | MAJIN     | 64722273 rs161030  | 11 | 64712696  | A | G | 0.24752 | -0.18715 | 0.08685 | 3.12E-02 | -0.06519 | 0.01112 | 4.63E-09 | 2.87086  | 1.41944  | 4.31E-02  | 4.31E-02 | 2.43E-01 | 12       |    |
| ENSG00000149806 | 11 | FAU       | 64889022 rs769440  | 11 | 64889414  | G | A | 0.51093 | 0.183477 | 0.06949 | 8.29E-03 | -0.09061 | 0.01182 | 1.76E-14 | -2.02485 | 0.81113  | 1.25E-02  | 1.25E-02 | 8.32E-01 | 17       |    |
| ENSG00000198121 | 11 | GNPFL21   | 66839520 rs163043  | 11 | 66839520  | G | A | 0.3002  | 0.1507   | 0.06506 | 3.07E-03 | 0.1664   | 0.20679 | #####    | 8.93E-00 | -1.24166 | 4.803E-03 | 9.74E-03 | 9.22E-02 | 1.12E-01 | 20 |
| ENSG00000132740 | 11 | IIGHMP22  | 66879860 rs496616  | 11 | 66872800  | C | G | 0.29521 | -0.15083 | 0.07419 | 4.21E-02 | 0.05534  | 0.00762 | #####    | 0.23045  | 1.1324   | 2.41E-02  | 8.34E-01 | 9.74E-01 | 20       |    |
| ENSG00000256518 | 11 | FOLR1P1   | 71870385 rs301830  | 11 | 71852122  | G | A | 0.46521 | -0.14481 | 0.07181 | 4.37E-02 | -0.41927 | 0.02095 | 5.52E-89 | 0.345376 | 0.17244  | 1.48E-02  | 3.18E-01 | 9.54E-01 | 20       |    |
| ENSG00000149243 | 11 | LKLH35    | 75137556 rs301810  | 11 | 75141762  | T | C | 0.42346 | 0.17669  | 0.06994 | 1.81E-02 | -0.36211 | 0.0078  | #####    | -0.48651 | 0.19344  | 1.19E-02  | 3.97E-02 | 6.79E-01 | 20       |    |
| ENSG00000151366 | 11 | NDJUF2C   | 77783037 rs657727  | 11 | 77774736  | T | C | 0.168   | 0.24932  | 0.09672 | 1.16E-02 | -0.3501  | 0.01104 | #####    | -0.71215 | 0.28287  | 1.18E-02  | 8.35E-02 | 7.94E-01 | 20       |    |
| ENSG00000198997 | 11 | KCTD21    | 77891081 rs510318  | 11 | 77808818  | C | T | 0.17296 | 0.264367 | 0.07983 | 4.73E-03 | -0.26987 | 0.01273 | 1.52E-99 | -0.98032 | 0.36939  | 9.96E-03  | 3.54E-01 | 6.70E-01 | 20       |    |
| ENSG00000151376 | 11 | ME3       | 86267914 rs170371  | 11 | 86383876  | A | C | 0.12724 | -0.20664 | 0.10415 | 4.75E-02 | 0.64985  | 0.01121 | #####    | -0.31799 | 0.16037  | 1.47E-02  | 1.68E-01 | 1.44E-01 | 20       |    |
| ENSG00000137714 | 11 | FDX1      | 110318106 rs108911 | 11 | 110331848 | G | C | 0.28032 | -0.20304 | 0.07314 | 1.05E-02 | 0.3205   | 0.00884 | #####    | -0.6335  | 0.24816  | 1.70E-02  | 9.66E-02 | 5.58E-01 | 20       |    |
| ENSG00000137371 | 11 | FXVD2     | 11768529 rs112165  | 11 | 11769397  | T | C | 0.44831 | 0.144098 | 0.07128 | 4.59E-02 | -0.10799 | 0.0081  | 1.41E-40 | -1.33437 | 0.67588  | 4.84E-02  | 4.62E-01 | 1.40E-02 | 20       |    |
| ENSG00000254528 | 11 | RYDB-AS1  | 11770345 rs127903  | 11 | 11770345  | T | C | 0.14016 | 0.28927  | 0.17496 | 4.59E-02 | 0.55433  | 0.01063 | #####    | 0.238691 | 0.23496  | 1.52941   | 4.39E-02 | 3.82E-01 | 7.95E-01 | 20 |
| ENSG00000064309 | 11 | CDON      | 125879460 rs46725  | 11 | 125917325 | A | G | 0.14414 | -0.35828 | 0.12513 | 8.02E-03 | 0.11665  | 0.0112  | 2.20E-25 | -3.07155 | 1.9545   | 1.02E-02  | 2.70E-02 | 2.27E-01 | 20       |    |
| ENSG00000134954 | 11 | ETS1      | 128393046 rs58369  | 11 | 128186631 | A | C | 0.19185 | 0.178837 | 0.08303 | 3.25E-02 | -0.07898 | 0.00944 | 5.74E-17 | -2.26443 | 1.08552  | 3.70E-02  | 2.30E-01 | 4.65E-01 | 16       |    |
| ENSG00000134909 | 11 | ARGHAP32  | 128992807 rs112216 | 11 | 129207859 | A | C | 0.23758 | -0.22989 | 0.10703 | 1.22E-02 | 0.24128  | 0.00976 | #####    | -0.95278 | 0.41926  | 2.31E-02  | 1.81E-01 | 6.83E-01 | 20       |    |
| ENSG00000080854 | 11 | IGSF8B    | 133806302 rs329673 | 11 | 133798999 | C | T | 0.20179 | 0.248744 | 0.08802 | 4.71E-02 | -0.2257  | 0.01377 | 1.14E-87 | -1.10217 | 0.39391  | 5.14E-03  | 5.31E-02 | 6.19E-01 | 20       |    |
| ENSG00000109586 | 11 | ALLEC     | 13413169 rs793768  | 11 | 134211367 | A | C | 0.12127 | 0.229401 | 0.10310 | 3.72E-02 | 0.72161  | 0.00276 | #####    | 0.27757  | 3.76E-03 | 2.29E-02  | 1.37E-01 | 3.91E-01 | 20       |    |
| ENSG00000255545 | 11 | BGSAT1-DT | 134340961 rs877605 | 11 | 134281313 | G | C | 0.12127 | 0.229401 | 0.10310 | 3.72E-02 | -0.72161 | 0.00276 | #####    | -1.02611 | 0.15493  | 7.95E-02  | 4.83E-01 | 6.65E-01 | 20       |    |
| ENSG00000102645 | 11 | IQSEC3    | 231778 rs573719    | 11 | 238901    | C | G | 0.33897 | 0.170687 | 0.07831 | 2.08E-02 | 0.5802   | 0.01436 | #####    | 0.284186 | 0.12742  | 2.10E-02  | 9.73E-02 | 8.69E-01 | 20       |    |
| ENSG00000177406 | 11 | NIJN2-AS1 | 756464 rs558009    | 11 | 752360    | A | G | 0.13022 | 0.24604  | 0.0731  | 1.01E-02 | 0.94098  | 0.01272 | #####    | 0.238691 | 0.09283  | 1.01E-02  | 9.91E-01 | 9.52E-01 | 20       |    |
| ENSG00000047621 | 11 | C12orf4   | 4622284 rs108490   | 11 | 4597481   | C | A | 0.1839  | -0.25309 | 0.09867 | 1.03E-02 | -0.20071 | 0.01095 | 5.34E-75 | 1.26998  | 0.4964   | 1.11E-02  | 5.10E-01 | 2.01E-01 | 20       |    |
| ENSG00000159076 | 11 | CHD1      | 7851324 rs504587   | 11 | 7851324   | A | C | 0.14016 | 0.28927  | 0.17496 | 4.59E-02 | 0.55433  | 0.01063 | #####    | 0.238691 | 0.23496  | 1.52941   | 4.39E-02 | 3.82E-01 | 7.95E-01 | 20 |
| ENSG00000116642 | 11 | CHD4      | 6697945 rs796917   | 11 | 6719280   | A | G | 0.1342  | 0.22413  | 0.09624 | 2.04E-02 | -0.14847 | 0.01094 | 6.25E-42 | -1.50984 | 0.6064   | 2.23E-02  | 1.28E-01 | 9.10E-01 | 20       |    |
| ENSG00000164574 | 11 | LPAR5     | 6736807 rs729441   | 11 | 6689866   | T | A | 0.1332  | 0.222726 | 0.09663 | 1.22E-02 | -0.38806 | 0.01209 | #####    | -0.57395 | 0.24964  | 1.85E-02  | 2.71E-01 | 6.36E-01 | 20       |    |
| ENSG00000066115 | 11 | TM7SF3    | 27146747 rs487578  | 11 | 27115395  | C | T | 0.15805 | 0.247651 | 0.10643 | 1.73E-02 | -0.25875 | 0.01199 | #####    | -0.95799 | 0.40485  | 1.80E-02  | 4.91E-01 | 1.83E-01 | 20       |    |
| ENSG00000067542 | 11 | TUBA1A    | 49580483 rs111868  | 11 | 49515130  | T | C | 0.02783 | -0.64116 | 0.3817  | 3.97E-02 | 0.4493   | 0.04688 | 1.07E-26 | -1.28413 | 0.63571  | 3.44E-02  | 1.26E-01 | 2.31E-01 | 19       |    |
| ENSG00000198876 | 11 | RAN       | 54194844 rs19484   | 11 | 54194844  | G | T | 0.20775 | -0.2317  | 0.07985 | 8.67E-03 | 0.26705  | 0.01106 | 8.98E-78 | 1.26939  | 0.48303  | 9.35E-03  | 4.17E-02 | 6.80E-01 | 20       |    |
| ENSG00000063636 | 11 | EIF4B     | 53417967 rs795744  | 11 | 53408580  | A | G | 0.16799 | -0.17598 | 0.08247 | 3.29E-02 | 0.4451   | 0.01728 | #####    | -0.38753 | 0.18221  | 3.34E-02  | 1.34E-01 | 4.22E-01 | 20       |    |
| ENSG00000167778 | 11 | SPRYD3    | 53465796 rs730263  | 11 | 53471929  | C | T | 0.17594 | 0.171526 | 0.06642 | 4.72E-02 | 0.18961  | 0.01024 | 1.32E-76 | 0.904648 | 0.45839  | 4.84E-02  | 1.43E-01 | 2.96E-02 | 20       |    |
| ENSG00000135414 | 11 | GDF11     | 56143987 rs730220  | 11 | 56449435  | A | C | 0.32704 | 0.186879 | 0.07855 | 1.73E-02 | -0.06746 | 0.00682 | 4.93E-15 | -2.77021 | 1.21692  | 2.28E-02  | 4.55E-02 | 9.91E-01 | 19       |    |
| ENSG00000139531 | 11 | SUXO      | 56395694 rs187391  | 11 | 56379042  | G | C | 0.39065 | 0.172038 | 0.07397 | 2.90E-02 | -0.33661 | 0.00787 | #####    | -0.93109 | 0.22008  | 2.02E-02  | 1.40E-01 | 9.58E-01 | 20       |    |
| ENSG00000197728 | 11 | RFX5      | 56438459 rs151319  | 11 | 56438459  | G | T | 0.40855 | 0.18089  | 0.07923 | 2.90E-02 | 0.34927  | 0.00854 | #####    | 0.20883  | 0.519691 | 2.02E-02  | 7.67E-01 | 7.95E-01 | 20       |    |
| ENSG00000065545 | 11 | ERBB3     | 56484635 rs111717  | 11 | 56470625  | C | G | 0.41451 | 0.157359 | 0.07249 | 2.09E-02 | -0.16793 | 0.01015 | 2.05E-94 | -0.93707 | 0.43398  | 3.08E-02  | 4.72E-02 | 8.66E-01 | 20       |    |
| ENSG00000111537 | 11 | IFNG      | 68551037 rs287096  | 11 | 68426626  | T | C | 0.28827 | -0.15421 | 0.07576 | 4.18E-02 | -0.09155 | 0.00851 | 2.9E-27  | 1.68433  | 0.84217  | 4.55E-02  | 2.21E-02 | 9.47E-01 | 20       |    |
| ENSG00000179941 | 11 | BBS10     | 76740238 rs344921  | 11 | 76804493  | C | T | 0.23459 | -0.17165 | 0.08634 | 4.68E-02 | -0.24131 | 0.00898 | #####    | 0.71132  | 0.38976  | 4.74E-02  | 2.83E-01 | 3.47E-02 | 20       |    |
| ENSG00000179104 | 11 | TMTC2     | 83304664 rs111197  | 11 | 83523857  | A | C | 0.333   | -0.16394 | 0.13712 | 2.50E-02 | -0.10466 | 0.00824 | 4.9E-37  | 1.56847  | 0.70948  | 2.72E-02  | 1.75E-01 | 2.74E-01 | 20       |    |
| ENSG00000198107 | 11 | RAN       | 8503933 rs58369    | 11 | 85089320  | C | T | 0.14016 | 0.28927  | 0.17496 | 4.59E-02 | 0.55433  | 0.01063 | #####    | 0.238691 | 0.23496  | 1.52941   | 4.39E-02 | 3.82E-01 | 7.95E-01 | 20 |
| ENSG00000193324 | 11 | TMTC3     | 88564868 rs111054  | 11 | 88490111  | T | C | 0.01292 | -0.23288 | 0.23529 | 4.02E-02 | 0.46462  | 0.04275 | 1.65E-27 | -1.13722 | 0.5176   | 2.80E-02  | 2.80E-02 | 5.74E-01 | 20       |    |
| ENSG00000257345 | 11 | LINC02413 | 93403295 rs476050  | 11 | 93349509  | T | A | 0.11133 | 0.228142 | 0.09885 | 2.06E-02 | 0.28559  | 0.02964 | 5.66E-22 | 0.798858 | 0.3549   | 2.24E-02  | 1.21E-01 | 1.72E-01 | 20       |    |
| ENSG00000173598 | 11 | NUDT4     | 93784341 rs322880  | 11 | 93796613  | A | C | 0.14215 | 0.217963 | 0.09867 | 2.72E-02 | -0.14369 | 0.01137 | 1.24E-36 | -1.19619 | 0.69712  | 2.96E-02  | 1.31E-01 | 1.85E-01 | 20       |    |
| ENSG00000111142 | 11 | METAP2    | 95888455 rs301037  | 11 | 95877531  | C | C | 0.08847 | 0.241394 | 0.10624 | 2.31E-02 | 0.26054  | 0.01247 | 5.90E-97 | 0.926517 | 0.41015  | 2.39E-02  | 1.83E-01 | 9.49E-01 | 20       |    |
| ENSG00000117145 | 11 | TRAF3     | 9617996 rs47       |    |           |   |   |         |          |         |          |          |         |          |          |          |           |          |          |          |    |

|                 |    |           |          |          |    |          |   |   |         |          |         |          |          |         |           |          |          |          |          |          |    |
|-----------------|----|-----------|----------|----------|----|----------|---|---|---------|----------|---------|----------|----------|---------|-----------|----------|----------|----------|----------|----------|----|
| ENSG00000132600 | 16 | PRMT7     | 68368671 | rs795430 | 16 | 68387341 | T | C | 0.11332 | 0.215577 | 0.10124 | 3.32E-02 | 0.42025  | 0.01308 | #####     | 0.512972 | 0.24143  | 3.36E-02 | 2.73E-02 | 3.58E-01 | 20 |
| ENSG00000184939 | 16 | ZFP90     | 68588884 | rs805831 | 16 | 68584151 | G | A | 0.20875 | -0.24184 | 0.09449 | 1.05E-02 | -0.8445  | 0.00824 | #####     | 0.266371 | 0.11193  | 1.05E-02 | 7.16E-02 | 7.66E-02 | 20 |
| ENSG00000157423 | 16 | HYDIN     | 7102593  | rs764605 | 16 | 71037121 | G | A | 0.0169  | 0.50024  | 0.29222 | 2.91E-02 | 0.0293   | 0.2459  | #####     | 0.9655   | -1.30174 | 0.80227  | 3.37E-02 | 2.98E-01 | 24 |
| ENSG00000103196 | 16 | CRISPLD2  | 84839882 | rs805743 | 16 | 84839854 | C | A | 0.27435 | 0.167226 | 0.07875 | 3.32E-02 | -0.56417 | 0.00817 | #####     | -0.2393  | 0.13963  | 3.93E-02 | 4.07E-01 | 1.58E-01 | 17 |
| ENSG00000225614 | 16 | ZNF469    | 86500522 | rs726314 | 16 | 86002342 | C | G | 0.19384 | 0.2053   | 0.08306 | 1.34E-02 | -0.0827  | 0.01165 | 1.26E-12  | -2.48237 | 1.06344  | 1.96E-02 | 6.06E-02 | 1.97E-01 | 20 |
| ENSG00000167515 | 16 | TRAPPC2L  | 88205861 | rs382606 | 16 | 88927221 | T | G | 0.34493 | -0.23275 | 0.06785 | 2.46E-03 | -0.27369 | 0.00956 | #####     | 0.850406 | 0.28236  | 2.60E-03 | 4.82E-02 | 3.65E-01 | 20 |
| ENSG00000167523 | 16 | SPATA33   | 89730945 | rs164749 | 16 | 89776824 | C | G | 0.48509 | 0.150493 | 0.07127 | 3.88E-02 | 0.12599  | 0.00892 | 2.29E-47  | 1.19449  | 0.58348  | 4.06E-02 | 5.60E-03 | 6.26E-01 | 20 |
| ENSG00000167530 | 16 | SOX2      | 9052364  | rs707772 | 17 | 9052364  | G | T | 0.22664 | 0.19491  | 0.05773 | 4.02E-02 | 0.03429  | 0.00824 | #####     | 0.7665   | 2.23E-02 | 0.38227  | 3.07E-02 | 2.99E-01 | 24 |
| ENSG00000066320 | 17 | NTN1      | 9036088  | rs721919 | 17 | 91493922 | C | G | 0.26504 | -0.18275 | 0.08278 | 2.46E-02 | -0.11096 | 0.00901 | 4.33E-29  | 1.64896  | 0.74716  | 2.75E-02 | 2.57E-02 | 1.26E-01 | 20 |
| ENSG00000006744 | 17 | ARHGAP44  | 12793908 | rs2523   | 17 | 12895815 | C | T | 0.39364 | -0.14658 | 0.07348 | 4.61E-02 | 0.16198  | 0.00896 | 5.39E-73  | -0.90493 | 0.4564   | 4.74E-02 | 1.78E-01 | 6.49E-01 | 20 |
| ENSG00000239704 | 17 | CDRT4     | 15373127 | rs238815 | 17 | 15468444 | A | C | 0.32604 | -0.22801 | 0.07369 | 1.97E-03 | -0.27925 | 0.00873 | #####     | 0.816942 | 0.2651   | 2.07E-03 | 1.70E-02 | 6.12E-01 | 20 |
| ENSG00000223878 | 17 | PPIAIP5   | 15410424 | rs293817 | 17 | 15452008 | C | G | 0.32704 | -0.22324 | 0.07369 | 1.97E-03 | -0.27925 | 0.00873 | #####     | 0.816942 | 0.2651   | 2.07E-03 | 1.70E-02 | 6.12E-01 | 20 |
| ENSG00000187607 | 17 | ZNF286A   | 15621882 | rs124535 | 17 | 15613384 | G | C | 0.37078 | -0.15864 | 0.07476 | 3.99E-02 | -0.7025  | 0.01616 | #####     | 0.225816 | 1.0655   | 3.41E-02 | 6.40E-03 | 3.23E-01 | 20 |
| ENSG00000141027 | 17 | NCOR1     | 16028108 | rs108528 | 17 | 16174506 | C | C | 0.4831  | 0.155919 | 0.07182 | 2.99E-02 | -0.31537 | 0.00779 | #####     | -0.4944  | 0.22806  | 3.02E-02 | 1.04E-02 | 7.73E-01 | 20 |
| ENSG00000108474 | 17 | PIGL      | 16186319 | rs116519 | 17 | 16234462 | G | A | 0.50698 | -0.15388 | 0.07182 | 3.97E-02 | 0.20276  | 0.00798 | #####     | -0.79302 | 0.35586  | 3.43E-02 | 1.95E-02 | 7.66E-01 | 20 |
| ENSG00000169376 | 17 | LRRF5     | 16370179 | rs129387 | 17 | 16344100 | C | T | 0.45527 | 0.14411  | 0.07626 | 4.30E-02 | 0.40775  | 0.00638 | #####     | -0.35349 | 0.17651  | 4.44E-02 | 1.49E-02 | 7.40E-01 | 20 |
| ENSG00000181350 | 17 | LRRF75A   | 16370179 | rs129387 | 17 | 16344100 | C | T | 0.45527 | 0.14411  | 0.07626 | 4.30E-02 | 0.40775  | 0.00638 | #####     | -0.35349 | 0.17651  | 4.44E-02 | 1.49E-02 | 7.40E-01 | 20 |
| ENSG00000128438 | 17 | TBC1D27P  | 16832191 | rs602654 | 17 | 16837274 | A | G | 0.167   | 0.26483  | 0.09847 | 7.28E-03 | 0.11572  | 0.01236 | 7.55E-21  | 2.28373  | 0.88513  | 1.88E-03 | 8.35E-02 | 6.22E-01 | 20 |
| ENSG00000240505 | 17 | TNFRSF13B | 16854140 | rs557701 | 17 | 16841424 | A | C | 0.18688 | 0.225941 | 0.08016 | 6.72E-03 | -0.06101 | 0.01013 | 1.69E-09  | -3.7031  | 0.95179  | 1.83E-02 | 1.83E-02 | 4.66E-01 | 20 |
| ENSG00000008711 | 17 | PIGS      | 26889645 | rs633274 | 17 | 26882994 | T | A | 0.17893 | -0.24949 | 0.09738 | 1.04E-02 | -0.11565 | 0.01089 | 2.39E-26  | 2.1572   | 0.86614  | 1.28E-02 | 6.28E-02 | 6.25E-01 | 20 |
| ENSG00000109147 | 17 | LINCOC    | 26922607 | rs221979 | 17 | 27004305 | C | A | 0.2033  | -0.16869 | 0.07626 | 2.71E-02 | -0.26757 | 0.00697 | #####     | 0.636841 | 0.28393  | 2.75E-02 | 4.17E-01 | 1.83E-01 | 20 |
| ENSG00000161395 | 17 | PGAP3     | 37840122 | rs292155 | 17 | 37832735 | T | C | 0.31809 | 0.190414 | 0.07740 | 4.02E-02 | 0.35466  | 0.00823 | #####     | 0.536442 | 0.21861  | 1.41E-02 | 2.67E-01 | 4.82E-01 | 20 |
| ENSG00000141736 | 17 | ERBB2     | 37865423 | rs903506 | 17 | 37879762 | G | A | 0.32803 | 0.22144  | 0.07241 | 2.23E-03 | 0.06866  | 0.00843 | 3.68E-16  | 3.22495  | 1.2624   | 4.20E-03 | 2.57E-02 | 6.54E-01 | 20 |
| ENSG00000161405 | 17 | IKZF3     | 37907819 | rs907901 | 17 | 37921742 | C | G | 0.48907 | 0.166469 | 0.07255 | 2.18E-02 | -0.3593  | 0.00771 | #####     | -0.46331 | 0.20215  | 2.19E-02 | 4.46E-01 | 6.21E-01 | 20 |
| ENSG00000173605 | 17 | GSDMB     | 38068477 | rs129362 | 17 | 38029120 | C | G | 0.48509 | 0.150493 | 0.07231 | 2.89E-02 | 0.83389  | 0.00643 | #####     | 1.1895   | 0.08672  | 2.89E-02 | 2.03E-01 | 2.25E-01 | 20 |
| ENSG00000172057 | 17 | SRFBP2    | 4391381  | rs123636 | 17 | 4391381  | G | C | 0.48509 | 0.150493 | 0.07231 | 2.89E-02 | 0.83389  | 0.00643 | #####     | 1.1895   | 0.08672  | 2.89E-02 | 2.03E-01 | 2.25E-01 | 20 |
| ENSG00000131095 | 17 | GFAP      | 42988340 | rs991649 | 17 | 42987524 | C | G | 0.26243 | -0.15854 | 0.07421 | 4.06E-02 | -0.06202 | 0.00803 | 3.96E-18  | 1.97426  | 0.99102  | 6.64E-02 | 9.75E-02 | 7.24E-01 | 20 |
| ENSG00000228782 | 17 | MRPL45P2  | 45484896 | rs585129 | 17 | 45523858 | C | T | 0.4831  | 0.21111  | 0.06961 | 2.42E-03 | -0.43373 | 0.01682 | #####     | -0.48674 | 0.1616   | 2.62E-03 | 8.98E-03 | 3.34E-01 | 20 |
| ENSG00000141279 | 17 | NPEPPS    | 45650474 | rs104320 | 17 | 45624934 | C | A | 0.47515 | -0.18985 | 0.07604 | 6.72E-03 | -0.22098 | 0.00846 | #####     | 0.85912  | 0.31868  | 7.02E-03 | 1.99E-02 | 3.82E-01 | 20 |
| ENSG00000263766 | 17 | KPNB1-DT  | 45740006 | rs390896 | 17 | 45750596 | G | A | 0.46223 | -0.17398 | 0.07013 | 1.04E-02 | -0.11187 | 0.01907 | 4.47E-09  | 1.6072   | 0.68412  | 1.88E-02 | 1.48E-02 | 4.27E-01 | 20 |
| ENSG00000198632 | 17 | SPRY2     | 4712466  | rs112882 | 17 | 4712466  | C | A | 0.42346 | 0.24991  | 0.07626 | 4.30E-02 | 0.35049  | 0.01154 | #####     | 0.24584  | 0.24587  | 4.98E-02 | 8.41E-02 | 7.68E-01 | 20 |
| ENSG00000173888 | 17 | PHOSPHO1  | 47304428 | rs116509 | 17 | 47345552 | C | C | 0.24354 | 0.175476 | 0.08043 | 3.68E-02 | 0.18384  | 0.0092  | 3.98E-89  | 0.95453  | 0.45959  | 7.98E-02 | 1.79E-01 | 5.17E-01 | 20 |
| ENSG00000108821 | 17 | COL1A1    | 48268291 | rs989818 | 17 | 48278507 | C | T | 0.20676 | -0.20224 | 0.09849 | 4.00E-02 | 0.08405  | 0.01046 | 1.8E-16   | -2.40631 | 1.20945  | 4.66E-02 | 4.66E-02 | 2.03E-01 | 20 |
| ENSG00000136449 | 17 | MYCBPAP   | 48597303 | rs650466 | 17 | 48580257 | C | T | 0.43738 | -0.14324 | 0.07129 | 4.72E-02 | -0.29367 | 0.00792 | #####     | 0.487749 | 0.24619  | 4.76E-02 | 2.58E-01 | 8.87E-01 | 20 |
| ENSG00000183691 | 17 | NOG       | 54672005 | rs287776 | 17 | 54712328 | G | A | 0.07058 | -0.41508 | 0.16123 | 1.00E-02 | -0.26928 | 0.01728 | 1.00E-54  | 1.54145  | 0.60867  | 1.11E-02 | 1.44E-02 | 2.22E-02 | 20 |
| ENSG00000175156 | 17 | ITP2      | 5812466  | rs105392 | 17 | 5806393  | T | G | 0.44233 | 0.19777  | 0.07626 | 4.30E-02 | 0.11058  | 0.01552 | 2.02E-13  | 1.36879  | 0.7688   | 3.94E-02 | 3.15E-02 | 5.98E-01 | 20 |
| ENSG00000108950 | 17 | FAM20A    | 66563492 | rs118548 | 17 | 66575174 | G | A | 0.18329 | -0.22101 | 0.09304 | 1.70E-02 | -0.15325 | 0.01013 | 9.99E-52  | -1.44925 | 0.61461  | 1.84E-02 | 5.38E-02 | 3.24E-01 | 20 |
| ENSG00000109066 | 17 | TMEM104   | 72804270 | rs349861 | 17 | 72773115 | A | C | 0.44036 | 0.183631 | 0.0695  | 8.24E-03 | -0.0619  | 0.00795 | 6.98E-15  | -2.96637 | 1.18651  | 1.24E-02 | 1.47E-02 | 4.57E-01 | 14 |
| ENSG00000108479 | 17 | GALK1     | 73754733 | rs110634 | 17 | 73818872 | A | G | 0.19483 | 0.241121 | 0.09811 | 4.0E-02  | -0.26016 | 0.01041 | #####     | -0.92682 | 0.37893  | 1.44E-02 | 2.81E-02 | 5.06E-01 | 20 |
| ENSG00000220506 | 17 | CDK3      | 73996533 | rs116522 | 17 | 73969667 | C | T | 0.17992 | -0.20931 | 0.10474 | 5.78E-03 | -0.07917 | 0.01133 | 2.74E-12  | 3.65164  | 1.42241  | 1.03E-02 | 3.03E-02 | 3.09E-02 | 20 |
| ENSG00000161547 | 17 | SRFBP2    | 74173196 | rs123636 | 17 | 74173196 | C | T | 0.48509 | 0.150493 | 0.07231 | 2.89E-02 | 0.83389  | 0.00643 | #####     | 1.1895   | 0.08672  | 2.89E-02 | 2.03E-01 | 2.25E-01 | 20 |
| ENSG00000141582 | 17 | CBX4      | 77810091 | rs128525 | 17 | 77869802 | C | T | 0.39662 | -0.29467 | 0.08095 | 1.15E-02 | -0.14916 | 0.00929 | 4.98E-137 | 1.91701  | 0.54935  | 1.25E-02 | 2.19E-02 | 7.24E-01 | 20 |
| ENSG00000173821 | 17 | RNF213    | 78303625 | rs807902 | 17 | 78274186 | T | A | 0.31412 | 0.170407 | 0.07608 | 2.51E-02 | 0.05661  | 0.00929 | 1.09E-09  | 3.10123  | 1.43179  | 3.55E-02 | 7.79E-02 | 5.44E-01 | 20 |
| ENSG00000171246 | 17 | NPTX1     | 78446295 | rs341779 | 17 | 78669798 | T | G | 0.18092 | -0.22134 | 0.10699 | 3.88E-02 | -0.34104 | 0.0102  | #####     | 0.849021 | 0.31432  | 3.89E-02 | 6.72E-02 | 4.22E-01 | 20 |
| ENSG00000141954 | 17 | RPTOR     | 78729395 | rs406217 | 17 | 78676905 | C | T | 0.18092 | -0.22134 | 0.10699 | 3.88E-02 | -0.34104 | 0.0102  | #####     | 0.849021 | 0.31432  | 3.89E-02 | 6.72E-02 | 4.22E-01 | 20 |
| ENSG00000207736 | 17 | MIR1250   | 79121035 | rs496940 | 17 | 79121035 | C | T | 0.48933 | 0.18767  | 0.06944 | 6.72E-03 | -0.13058 | 0.01552 | 2.02E-13  | 1.36879  | 0.7688   | 3.94E-02 | 3.15E-02 | 5.98E-01 | 20 |
| ENSG00000181409 | 17 | AATK      | 79115486 | rs496940 | 17 | 79123135 | T | C | 0.39364 | 0.182821 | 0.06998 | 8.89E-03 | -0.05213 | 0.00998 | #####     | -0.34036 | 1.3025   | 8.97E-03 | 5.06E-02 | 2.53E-01 | 20 |
| ENSG00000186765 | 17 | FSCN2     | 79499789 | rs563242 | 17 | 79463324 | A | G | 0.36183 | 0.217318 | 0.07179 | 2.47E-03 | 0.06378  | 0.00937 | 2.76E-11  | -3.48364 | 1.26419  | 8.86E-03 | 5.86E-03 | 1.96E-01 | 20 |
| ENSG00000178927 | 17 | CYBC1     | 80044585 | rs375191 | 17 | 80406552 | C | G | 0.12624 | 0.206231 | 0.09417 | 3.20E-02 | -0.45289 | 0.01136 | #####     | -0.45537 | 0.21265  | 3.22E-02 | 7.98E-01 | 8.23E-02 | 20 |
| ENSG00000142458 | 17 | FNBP3     | 80053381 | rs224655 | 17 | 80060393 | T | A | 0.40054 | -0.15393 | 0.07626 | 4.30E-02 | -0.80463 | 0.00679 | 2.99E-02  | 1.00857  | 0.98857  | 3.14E-02 | 3.32E-02 | 1.11E-01 | 20 |
| ENSG00000141556 | 17 | TBCD      | 80085332 | rs807258 | 17 | 80083822 | A | G |         |          |         |          |          |         |           |          |          |          |          |          |    |

|                 |             |                   |               |   |         |          |         |          |          |         |          |          |         |          |          |          |    |
|-----------------|-------------|-------------------|---------------|---|---------|----------|---------|----------|----------|---------|----------|----------|---------|----------|----------|----------|----|
| ENSG00000211658 | 22 IGLV3-27 | 23011017 rs287706 | 22 23013171 C | T | 0.05964 | -0.30242 | 0.14382 | 3.55E-02 | 0.72368  | 0.04631 | 4.74E-55 | -0.41789 | 0.20053 | 3.72E-02 | 7.57E-03 | 8.82E-01 | 20 |
| ENSG00000253234 | 22 IGLV2-5  | 23199075 rs390407 | 22 23258231 C | T | 0.24354 | 0.155208 | 0.07448 | 3.72E-02 | -0.34048 | 0.0215  | 1.72E-56 | -0.45586 | 0.22063 | 3.88E-02 | 5.36E-02 | 7.93E-01 | 20 |
| ENSG00000211672 | 22 IGLV4-3  | 23213950 rs455941 | 22 23256260 G | T | 0.24752 | 0.149271 | 0.07457 | 4.53E-02 | -0.26249 | 0.02165 | 8.14E-34 | -0.56868 | 0.28795 | 4.83E-02 | 4.83E-02 | 8.70E-01 | 20 |
| ENSG00000211678 | 22 IGLJ3    | 23247117 rs285409 | 22 23249040 T | C | 0.4841  | 0.158123 | 0.07442 | 3.36E-02 | 0.2992   | 0.02233 | 6.26E-41 | 0.528494 | 0.25185 | 3.59E-02 | 1.88E-01 | 8.43E-01 | 20 |
| ENSG00000099974 | 22 DDTL     | 24311905 rs573897 | 22 24312629 G | C | 0.10437 | 0.272789 | 0.11518 | 1.79E-02 | 0.59283  | 0.06357 | 1.10E-20 | 0.460146 | 0.20045 | 2.17E-02 | 9.43E-02 | 6.65E-01 | 20 |
| ENSG00000180957 | 22 PITPNB   | 28281889 rs575266 | 22 28339350 T | C | 0.05666 | 0.381561 | 0.17284 | 2.73E-02 | 0.38978  | 0.02555 | 1.51E-52 | 0.978912 | 0.44804 | 2.89E-02 | 1.24E-02 | 1.89E-01 | 20 |
| ENSG00000100220 | 22 RTCB     | 32795905 rs12530  | 22 32783904 C | T | 0.14811 | -0.2144  | 0.08941 | 1.65E-02 | -0.16488 | 0.01101 | 1.12E-50 | 1.30033  | 0.54917 | 1.79E-02 | 2.73E-02 | 9.45E-01 | 20 |
| ENSG00000100336 | 22 APOL4    | 36593029 rs132735 | 22 36597891 T | G | 0.27038 | 0.256808 | 0.07198 | 3.60E-04 | 0.13569  | 0.00874 | 2.19E-54 | 1.89267  | 0.54432 | 5.07E-04 | 4.23E-03 | 2.17E-01 | 20 |
| ENSG00000100201 | 22 DDX17    | 38891555 rs226739 | 22 38889657 T | C | 0.30418 | 0.191242 | 0.07544 | 1.12E-02 | 0.23051  | 0.00846 | #####    | 0.82965  | 0.32869 | 1.16E-02 | 5.08E-02 | 9.69E-01 | 20 |
| ENSG00000100216 | 22 TOMM22   | 39079385 rs575719 | 22 39038790 C | A | 0.29523 | 0.163325 | 0.0763  | 3.23E-02 | -0.11556 | 0.009   | 9.34E-38 | -1.41335 | 0.66938 | 3.47E-02 | 2.38E-01 | 2.72E-01 | 20 |
| ENSG00000100221 | 22 JOSD1    | 39089554 rs575066 | 22 39080638 A | T | 0.29324 | 0.156356 | 0.07637 | 4.06E-02 | -0.2491  | 0.00891 | #####    | -0.62769 | 0.30739 | 4.12E-02 | 4.37E-02 | 6.48E-01 | 20 |
| ENSG00000183741 | 22 CBX6     | 39262887 rs729207 | 22 39266451 A | C | 0.17197 | 0.196992 | 0.09888 | 2.84E-02 | -0.4063  | 0.00968 | #####    | -0.48485 | 0.22151 | 2.86E-02 | 3.12E-01 | 3.66E-01 | 20 |
| ENSG00000100401 | 22 RANGAP1  | 41661935 rs565585 | 22 41700361 G | A | 0.43339 | -0.14928 | 0.07192 | 3.79E-02 | 0.10472  | 0.00796 | 1.52E-39 | -1.42551 | 0.69527 | 4.03E-02 | 6.69E-02 | 3.89E-02 | 20 |
| ENSG00000093000 | 22 NUP50    | 45571807 rs729082 | 22 45527815 T | C | 0.27932 | 0.197705 | 0.08099 | 1.46E-02 | -0.26679 | 0.0088  | #####    | -0.74106 | 0.30456 | 1.50E-02 | 7.12E-03 | 9.17E-02 | 20 |
| ENSG00000196576 | 22 PLXNB2   | 50729732 rs622412 | 22 50747507 A | G | 0.43042 | -0.1847  | 0.0725  | 1.08E-02 | -0.28094 | 0.01021 | #####    | 0.657445 | 0.25917 | 1.12E-02 | 6.38E-01 | 6.48E-01 | 20 |
| ENSG00000205593 | 22 DENND6B  | 50757940 rs622412 | 22 50753973 C | T | 0.34493 | -0.15431 | 0.0745  | 3.83E-02 | -0.30089 | 0.01001 | #####    | 0.512863 | 0.2482  | 3.88E-02 | 1.32E-01 | 8.81E-01 | 20 |

Supplementary Table S4 Primer sequences used for quantitative real-time PCR (qPCR)

| Primer Name               | Primer Sequence (5' to 3') |
|---------------------------|----------------------------|
| Human TAPBP forward       | CCTGGAGGTAGCAGGTCTTTC      |
| Human TAPBP reverse       | ATCCTTGCAGGTGGACAGGTA □    |
| Human HLA class I forward | AAAAGGAGGGAGTTACACTCAGG    |
| Human HLA class I reverse | GCTGTGAGGGACACATCAGAG      |
| Human ACTB forward        | CATGTACGTTGCTATCCAGGC □    |
| Human ACTB reverse        | CTCCTTAATGTCACGCACGAT □    |

# APC Subgroups

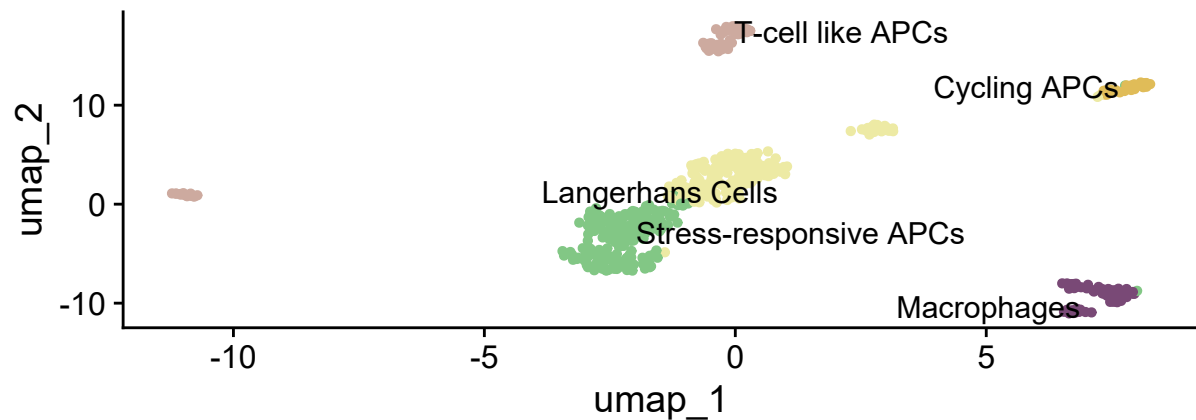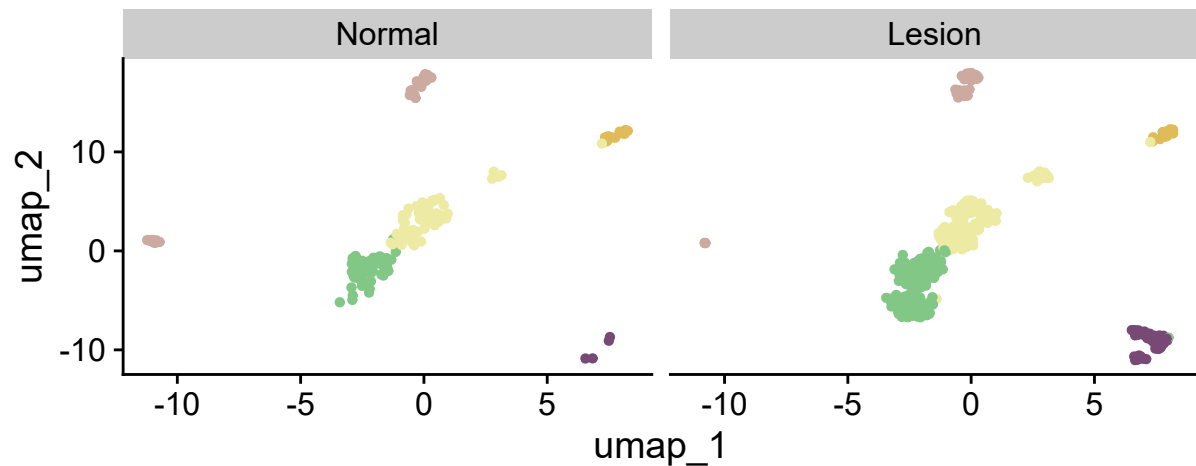

# APC Subgroup Infiltration

## Stress-responsive APCs

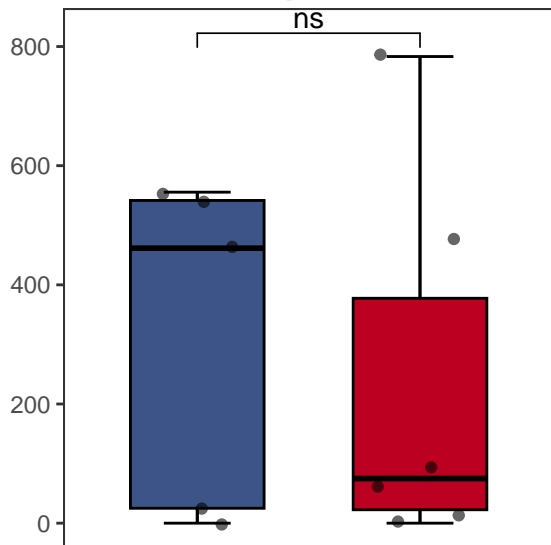

## Langerhans Cells

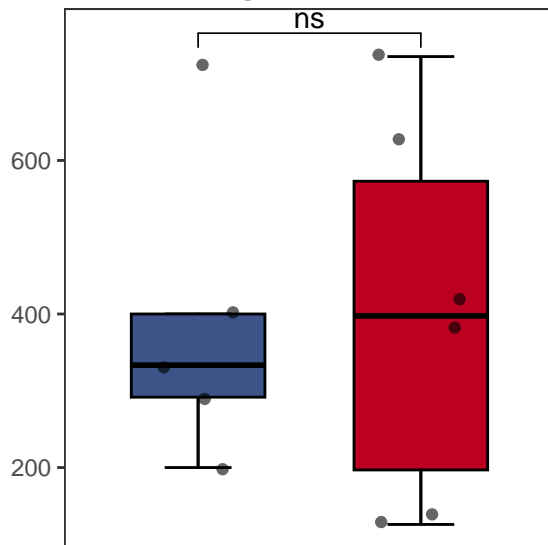

## T-cell like APCs

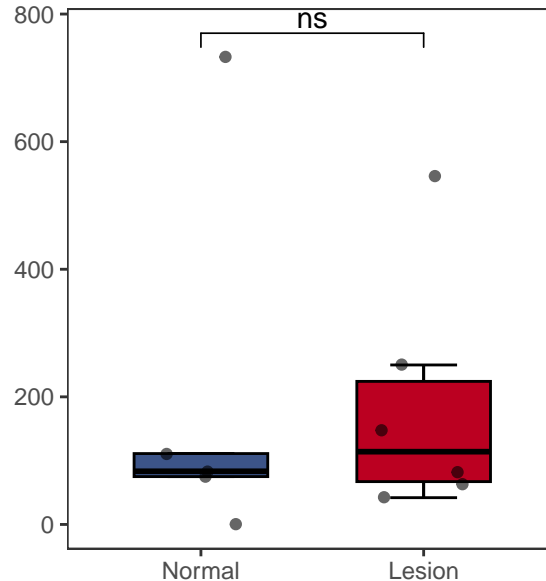

## Macrophages

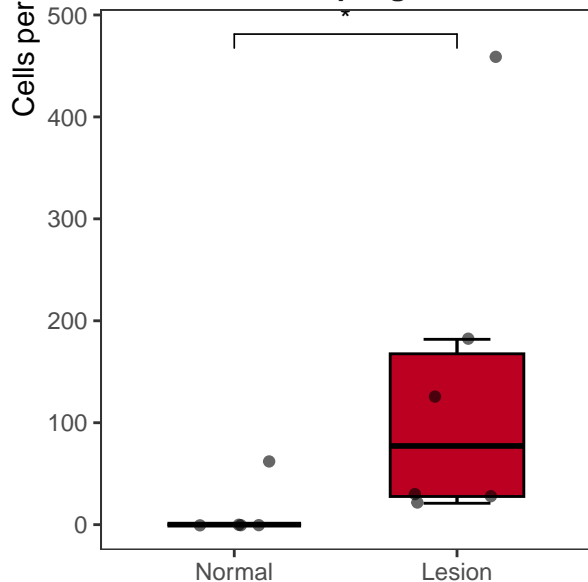

## Cycling APCs

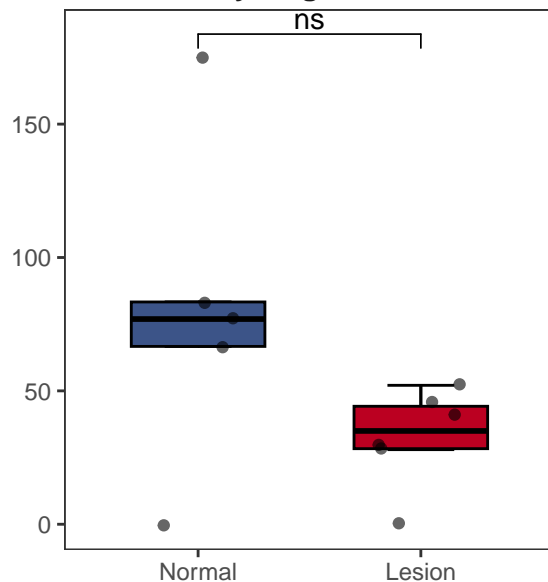

group

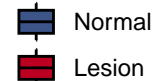

Supplement: Supplementary file 1 [file 577486%20Revised%20Supplementary%20Material.pdf]
